# A stochastic model of hippocampal synaptic plasticity with geometrical readout of enzyme dynamics

Yuri E. Rodrigues<sup>1,2,3,\*</sup>, Cezar M. Tigaret<sup>4</sup>, H el ene Marie<sup>1,3,6</sup>, Cian O'Donnell<sup>5,6</sup>, and Romain Veltz<sup>2,6,\*</sup>

<sup>1</sup>Universit e C te d'Azur, Nice 06108, Alpes-Maritimes, France

<sup>2</sup>Institut national de recherche en informatique et en automatique (INRIA), Sophia Antipolis 06901, Alpes-Maritimes, France

<sup>3</sup>Institut de Pharmacologie Mol culaire et Cellulaire (IPMC), Valbonne 06560, Alpes-Maritimes, France

<sup>4</sup>Neuroscience and Mental Health Research Institute, Division of Psychological Medicine and Clinical Neurosciences, School of Medicine, Cardiff University, Cardiff, CF24 4HQ, UK

<sup>5</sup>Computational Neuroscience Unit, School of Computer Science, Electrical and Electronic Engineering, and Engineering Mathematics, University of Bristol, Bristol BS8 1UB, UK

<sup>6</sup>Co-last authors

\*Corresponding authors: [yuri.rodriques@inria.fr](mailto:yuri.rodriques@inria.fr), [romain.veltz@inria.fr](mailto:romain.veltz@inria.fr)

## SUMMARY

Synaptic plasticity rules used in current computational models of learning are generally insensitive to physiological factors such as spine voltage, animal age, extracellular fluid composition, and body temperature, limiting their predictive power. Here, we built a biophysically detailed synapse model inclusive of electrical dynamics, calcium-dependent signaling via CaMKII and Calcineurin (CaN) activities. The model combined multi-timescale variables, milliseconds to minutes, and intrinsic noise from stochastic ion channel gating. Analysis of the trajectories of joint CaMKII and CaN activities yielded an interpretable geometrical readout that fitted the synaptic plasticity outcomes of nine published *ex vivo* experiments covering various spike-timing and frequency-dependent plasticity induction protocols, animal ages, and experimental conditions. Using this new approach, we then generated maps predicting plasticity outcomes across the space of these stimulation conditions. Finally, we tested the model's robustness to *in vivo*-like spike time irregularity, showing that it significantly alters plasticity outcomes.

## INTRODUCTION

To understand how brains learn, we need to identify the rules governing how synapses change their strength in neural circuits. What determines whether each synapse strengthens, weakens, or stays the same? The dominant principle at the basis of current models of synaptic plasticity is the Hebb postulate (Hebb, 1949) which states that neurons with correlated electrical activity strengthen their synaptic connections, while neurons active at different times weaken their connections. In particular, spike-timing-dependent plasticity (STDP) models (Blum and Abbott, 1996; Gerstner et al., 1996; Eurich et al., 1999) were formulated based on experimental observations that precise timing of pre- and post-synaptic spiking determines whether synapses are strengthened or weakened (Debanne et al., 1996; Tsodyks and Markram, 1997; Bi and Poo, 1998; Markram et al., 2011). However experiments also found that plasticity induction depends on the rate and number

of stimuli presented to the synapse (Dudek and Bear, 1992; Sj ostr om et al., 2001), and the level of dendritic spine depolarisation (Artola et al., 1990; Magee and Johnston, 1997; Sj ostr om and H ausser, 2006; Golding et al., 2002; Hardie and Spruston, 2009). The lack of satisfactory plasticity models based solely on neural spiking prompted researchers to consider more elaborate models based on synapse biochemistry (Shouval et al., 2010). Following a proposed role for postsynaptic calcium (Ca<sup>2+</sup>) signalling in synaptic plasticity (Lisman, 1989), previous models assumed that the amplitude of postsynaptic calcium controls long-term alterations in synaptic strength, with moderate levels of calcium causing long-term depression (LTD) and high calcium causing long-term potentiation (LTP) (Shouval et al., 2002; Karmarkar and Buonomano, 2002). Recent experimental data suggests that calcium dynamics is also important (Yang et al., 1999; Mizuno et al., 2001; Wang et al., 2005; Nevian and Sakmann, 2006; Tigaret et al., 2016).

As a result, subsequent phenomenological models of plasticity incorporated slow variables that integrate the fast synaptic input signals, loosely modelling calcium and its downstream effectors (Abarbanel et al., 2003; Rubin et al., 2005; Rackham et al., 2010; Clopath and Gerstner, 2010; Kumar and Mehta, 2011; Graupner and Brunel, 2012; Standage et al., 2014; De Pittà and Brunel, 2016).

However, even these models do not account for data showing that plasticity is highly sensitive to physiological conditions such as the developmental age of the animal (Dudek and Bear, 1993; Meredith et al., 2003; Cao and Harris, 2012; Cizeron et al., 2020), extracellular calcium and magnesium concentrations (Mulkey and Malenka, 1992; Inglebert et al., 2020) and tissue temperature (Volgushev et al., 2004; Wittenberg and Wang, 2006; Klyachko and Stevens, 2006). The fundamental issue is that the components of these phenomenological models do not directly map to biological components of synapses, so they cannot automatically model alterations due to physiological and experimental conditions. This absence limits the predictive power of existing plasticity models.

To tackle this problem, we took a bottom-up, data-driven approach by building a biologically-grounded model of plasticity induction at a single rat hippocampal CA3–CA1 synapse. We focus on this synapse type because of the abundant published experimental data that can be used to quantitatively constrain the model parameters. Compared to previous models in the literature, we aimed for an intermediate level of detail: enough biophysical components to capture the key dynamical processes underlying plasticity induction, but not the full molecular cascade underlying plasticity expression; much of which is poorly quantified (Heil et al., 2018). Our model centred on dendritic spine electrical dynamics, calcium signalling and immediate downstream molecules, which we then mapped to synaptic strength change via a conceptually new dynamical, geometric readout mechanism. Crucially, the model also captures intrinsic noise based on the stochastic switching of synaptic receptors and ion channels (Yuste et al., 1999; Ribault et al., 2011). We found that the model can account for published data from spike-timing and frequency-dependent plasticity experiments, and variations in physiological parameters influencing plasticity outcomes. We also tested how the model responded to *in vivo*-like spike timing jitter and spike failures, and found that the plasticity rules were highly sensitive to these subtle input alterations.

## RESULTS

### A multi-timescale model of synaptic plasticity induction

We built a computational model of plasticity induction at a single CA3–CA1 rat glutamatergic synapse (Fig-

ure 1). Our goal was to reproduce results on synaptic plasticity that explored the effects of several experimental parameters: fine timing differences between pre and postsynaptic spiking (Figures 2–3); stimulation frequency (Figure 4); animal age (Figure 5); external calcium and magnesium (Figure 6); stochasticity in the firing structure (Figure 7), temperature and experimental conditions variations (Supplemental Information). Where possible, we set parameters to values previously estimated from experiments, and tuned the remainder within physiologically plausible ranges to reproduce our target plasticity experiments (Methods).

The model components are schematized in Figure 1A (full details in Methods). For glutamate release, we used a two-pool vesicle depletion and recycling system, which accounts for short-term presynaptic depression and facilitation. When glutamate is released from vesicles, it can bind to the postsynaptic  $\alpha$ -amino-3-hydroxy-5-methyl-4-isoxazolepropionic acid and N-methyl-D-aspartate receptors (AMPA receptors and NMDA receptors, respectively). When dendritic spine voltage depolarises, it activates voltage-gated calcium channels (VGCCs) and removes magnesium ( $Mg^{2+}$ ) block from NMDA receptors. Back-propagating action potentials (BaP) can also cause spine depolarisation. As an inhibitory component, we modelled a gamma-aminobutyric acid receptor (GABA receptor) synapse on the dendrite shaft (Destexhe et al., 1998). Calcium ions influx through VGCCs and NMDA receptors can activate hyperpolarising SK potassium channels (Adelman et al., 2012; Griffith et al., 2016), bind to calmodulin (CaM) or to a generic calcium buffer. Calcium-bound calmodulin activates two major signalling molecules immediately downstream of Ca/CaM enzymes (Fujii et al., 2013):  $Ca^{2+}$ /calmodulin-dependent protein kinase II (CaMKII) or calcineurin (CaN) phosphatase, also known as PP2B (Saraf et al., 2018). We included these two proteins because CaMKII activation is necessary for Schaffer-collateral LTP Giese et al. (1998); Chang et al. (2017), while CaN activation is necessary for LTD (O'Connor et al., 2005; Otmakhov et al., 2015). Later, we show how we map the joint activity of CaMKII and CaN to LTP and LTD.

Synaptic receptors and ion channels have an inherent random behavior, stochastically switching between open and closed states (Ribault et al., 2011). If the number of receptors or channels is large, then the variability of the total population activity becomes negligible relative to the mean (O'Donnell and van Rossum, 2014). However individual hippocampal synapses contain only small numbers of receptors and ion channels, for example  $\sim 10$  NMDA receptors and  $< 15$  VGCCs (Takumi et al., 1999; Sabatini and Svoboda, 2000; Nimchinsky et al., 2004), making their total activation highly stochastic. Therefore, we modelled AMPA receptor, NMDA receptor, VGCCs and GABA receptor as stochastic processes. Presynaptic vesicle release events were also stochastic: glutamate

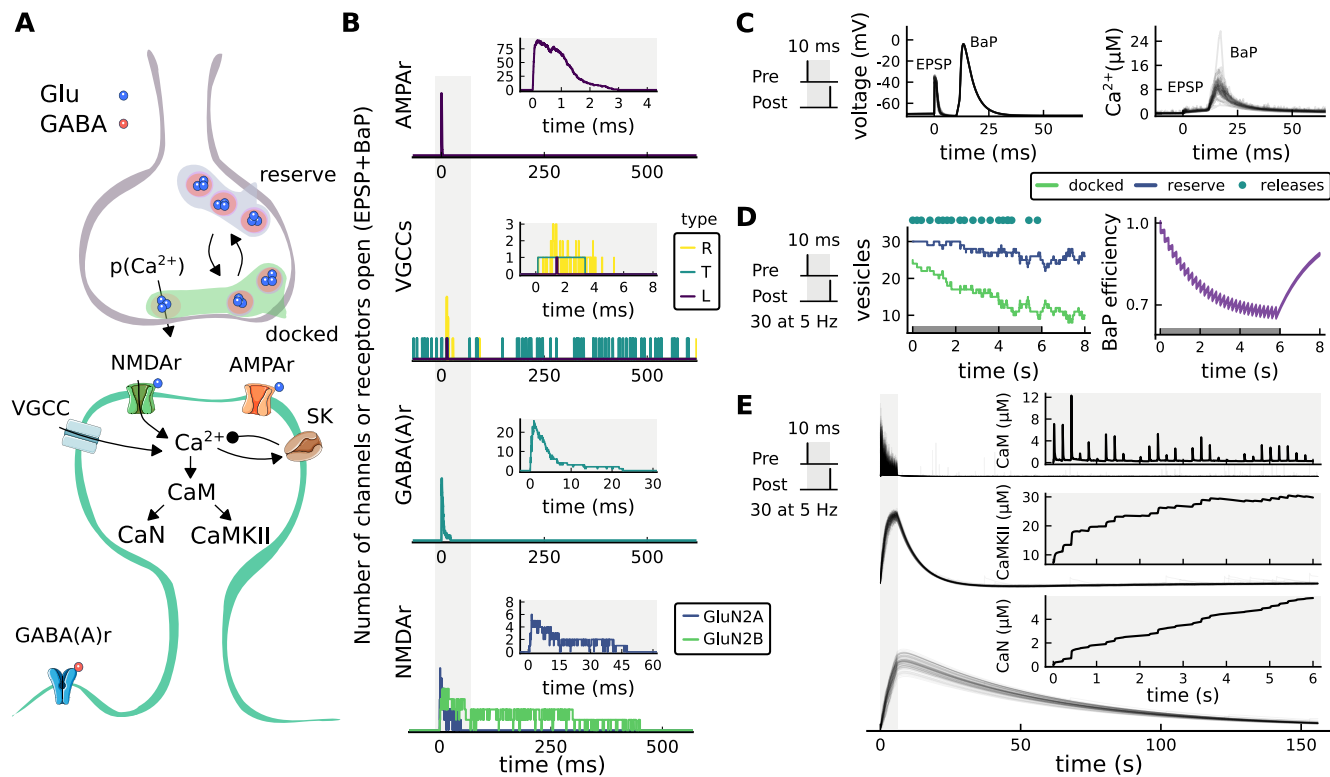

**Figure 1. The synapse model, its timescales and mechanisms.** A) Model diagram with the synaptic components, the pre and postsynaptic compartments. Inhibitory receptor bottom left. B) Stochastic dynamics of the different receptors and channels. Plots show the total number of open channels/receptors as a function of time. AMPARs and NMDARs are activated by glutamate, VGCC are activated by membrane potential, and GABA(A)r are activated by GABA. The timescale of variable response increases from top to bottom panels. C) Dendritic spine membrane potential (left) and calcium concentration (right) as function of time for a single causal (1Pre1Post10) stimulus. D) Left: depletion of vesicle pools (reserve and docked) induced by 30 pairing repetitions delivered at 5 Hz (Sterratt et al., 2011) (Methods). The same vesicle depletion rule is applied to both glutamate and GABA. Right: BaP efficiency as function of time. BaP efficiency controls the axial resistance between soma and dendrite in order to phenomenologically capture the distance-dependent BaP attenuation (Buchanan and Mellor, 2007; Golding et al., 2001) (Methods). E) Activated enzyme concentration for CaM, CaN and CaMKII, as function of time for the stimulus 1Pre1Post10, 30 pairing repetitions delivered at 5 Hz. Note that the vertical grey bar is the duration of the stimuli, 6 s.

release was an all-or-nothing event, and the amplitude of each glutamate pulse was drawn randomly, modelling heterogeneity in vesicle size (Liu et al., 1999). The inclusion of stochastic processes to account for an intrinsic noise in synaptic activation (Deperrois and Graupner, 2020) contrasts with most previous models in the literature, which either represent all variables as continuous and deterministic or add an external generic noise source (although see Bhalla, 2004; Antunes and De Schutter, 2012; Bartol et al., 2015).

The synapse model showed nonlinear dynamics across multiple timescales. For illustration, we stimulated the synapse with single simultaneous glutamate and GABA vesicle releases (Figure 1B). AMPARs and VGCCs open rapidly but close again within a few milliseconds. The dendritic GABA(A)r closes more slowly, on a timescale of  $\sim 10$  ms. NMDARs, the major calcium source, closes on timescales of  $\sim 50$  ms and  $\sim 250$  ms for the GluN2A and GluN2B subtypes, respectively.

To show the typical responses of the spine head voltage and  $Ca^{2+}$ , we stimulated the synapse with a single presynaptic pulse (EPSP) paired 10 ms later with a single BaP (1Pre1Post10) (Figure 1C, left). For this pairing, when BaP is triggered immediately after an EPSP, it

leads to a large  $Ca^{2+}$  transient aligned with the BaP due to the NMDARs first being bound by glutamate then unblocked by the BaP depolarisation (Figure 1C, right).

Single pre or postsynaptic stimulation pulses did not cause depletion of vesicle reserves or substantial activation of the enzymes. To illustrate these slower-timescale processes, we stimulated the synapse with a prolonged protocol: one presynaptic pulse followed by one postsynaptic pulse 10 ms later, repeated 30 times at 5 Hz (Figure 1D, E). The number of vesicles in both the docked and reserve pools decreased substantially over the course of the stimulation train (Figure 1D, left), which in turn causes decreased vesicle release probability. Similarly, by the 30th pulse, the dendritic BaP amplitude had attenuated to  $\sim 85\%$  ( $\sim 70\%$  BaP efficiency; Figure 1D, right) of its initial amplitude, modelling the effects of slow dendritic sodium channel inactivation (Colbert et al., 1997; Golding et al., 2001). CaM concentration rose rapidly in response to calcium transients but also decayed back to baseline on a timescale of  $\sim 500$  ms (Figure 1E top). In contrast, the concentration of active CaMKII and CaN accumulated over a timescale of seconds, reaching a sustained peak during the stimulation train, then decayed back to baseline on a timescale of

~10 and ~120 s respectively, in line with experimental data (Quintana et al., 2005; Fujii et al., 2013; Chang et al., 2017) (Figure 1E middle and bottom).

The effects of the stochastic variables can be seen in Figure 1B–D. The synaptic receptors and ion channels open and close randomly (Figure 1B). Even though spine voltage, calcium, and downstream molecules were modelled as continuous and deterministic, they inherited some randomness from the upstream stochastic variables. As a result, there was substantial trial-to-trial variability in the voltage and calcium responses to identical pre and postsynaptic spike trains (grey traces in Figure 1D). This variability was also passed on to the downstream enzymes CaM, CaMKII and CaN, but was filtered and therefore attenuated by the slow dynamics of CaMKII and CaN. In summary, the model contained stochastic nonlinear variables acting over five different orders of magnitude of timescale, from ~1 ms to ~1 min, making it sensitive to both fast and slow components of input signals.

### Distinguishing between stimulation protocols using the CaMKII and CaN joint response

It has proven difficult for simple models of synaptic plasticity to capture the underlying rules and explain why some stimulation protocols induce plasticity while others do not. We tested the model's sensitivity by simulating its response to a set of protocols used by Tigaret et al. (2016) in a recent *ex vivo* experimental study on adult (P50-55) rat hippocampus with blocked GABA<sub>A</sub>. We focused on three pairs of protocols (three rows in Figure 2). In each case in Tigaret et al. (2016)'s experiments, one of the pair induced LTP or LTD, while the other subtly different protocol caused no change (NC) in synaptic strength. We asked if the model's joint CaMKII-CaN activity could distinguish between each pair of protocols.

The first pair of protocols differed in intensity. A protocol which caused no plasticity consisted of 1 presynaptic spike followed 10 ms later by one postsynaptic spike repeated at 5 Hz for one minute (1Pre1Post10, 300 at 5Hz). The other protocol induced LTP, but differed only in that it included a postsynaptic doublet instead of a single spike (1Pre2Post10, 300 at 5Hz), implying a slightly stronger BaP amplitude initially. For the plots in Figure 2A, it was not possible to set a single concentration threshold on either CaMKII or CaN that would discriminate between the protocols.

To achieve better separability, we combined the activity of the two enzymes, plotting the joint CaMKII and CaN responses against each other on a 2D plane (Figure 2B). In this geometric plot, the two protocol's trajectories can be seen to overlap for the initial part of the transient, but then diverge. To quantify trial to trial variability, we also calculated contour maps showing the mean fraction of time the trajectories spent in each part of the plane during the stimulation (Figure 2C). Importantly,

both the trajectories and contour maps were substantially non-overlapping between the two protocols, implying that they can be separated based on the joint CaN-CaMKII activity. We found that the 1Pre2Post10 protocol leads to a weaker response in both CaMKII and CaN, corresponding to the lower blue traces Figure 2 B. The decreased response to the doublet protocol was due to the enhanced attenuation of dendritic BaP amplitude over the course of the simulation (Golding et al., 2001), leading to less calcium influx through NMDARs and VGCCs (data not shown).

The second pair of protocols we explored differed in sequencing. We stimulated the synapse model with one causal (EPSP-BaP) protocol involving a single presynaptic spike followed 50 ms later by a doublet of postsynaptic spikes (1Pre2Post50, 300 at 5Hz), repeated at 5 Hz for one minute, which Tigaret et al. (2016) found caused LTP. The other anticausal protocol involved the same total number of pre and postsynaptic spikes, but with the pre-post order reversed (2Post1Pre50, 300 at 5Hz). Experimentally this anticausal (BaP-EPSP) protocol did not induce plasticity. Notably, the only difference was the sequencing of whether the pre or postsynaptic neuron fired first, over a short time gap of 50 ms. Despite the activations being apparently difficult to distinguish (Figure 2D), we found that the LTP-inducing protocol caused greater CaN activation than the protocol that did not trigger plasticity. Indeed, this translated to a horizontal offset in both the trajectory and contour map (Figure 2E,F), demonstrating that another pair of protocols can be separated in the joint CaN-CaMKII plane.

The third pair of protocols differed in both duration and intensity. In line with previous studies, Tigaret et al. (2016) found that a train of doublets of presynaptic spikes separated by 50 ms repeated at a low frequency of 3 Hz for 5 minutes (2Pre50, 900 at 3Hz) induced LTD, while a slightly more intense but shorter duration protocol of presynaptic spike doublets separated by 10 ms repeated at 5 Hz for one minute (2Pre10, 300 at 5Hz) did not cause plasticity. When we simulated both protocols in the model (Figure 2G–I), both caused similar initial responses in CaMKII and CaN. In the shorter protocol, this activation decayed to baseline within 100 s of the end of the stimulation. However the slower and longer-duration 2Pre50 3Hz 900p protocol caused an additional sustained, stochastically fluctuating, plateau of activation of both enzymes (Figure 2G). This resulted in the LTD-inducing protocol having a downward and leftward-shifted CaN-CaMKII trajectory and contour plot, relative to the other protocol (Figure 2 H, I). These results again showed that the joint CaN-CaMKII activity may be useful to predict plasticity changes.

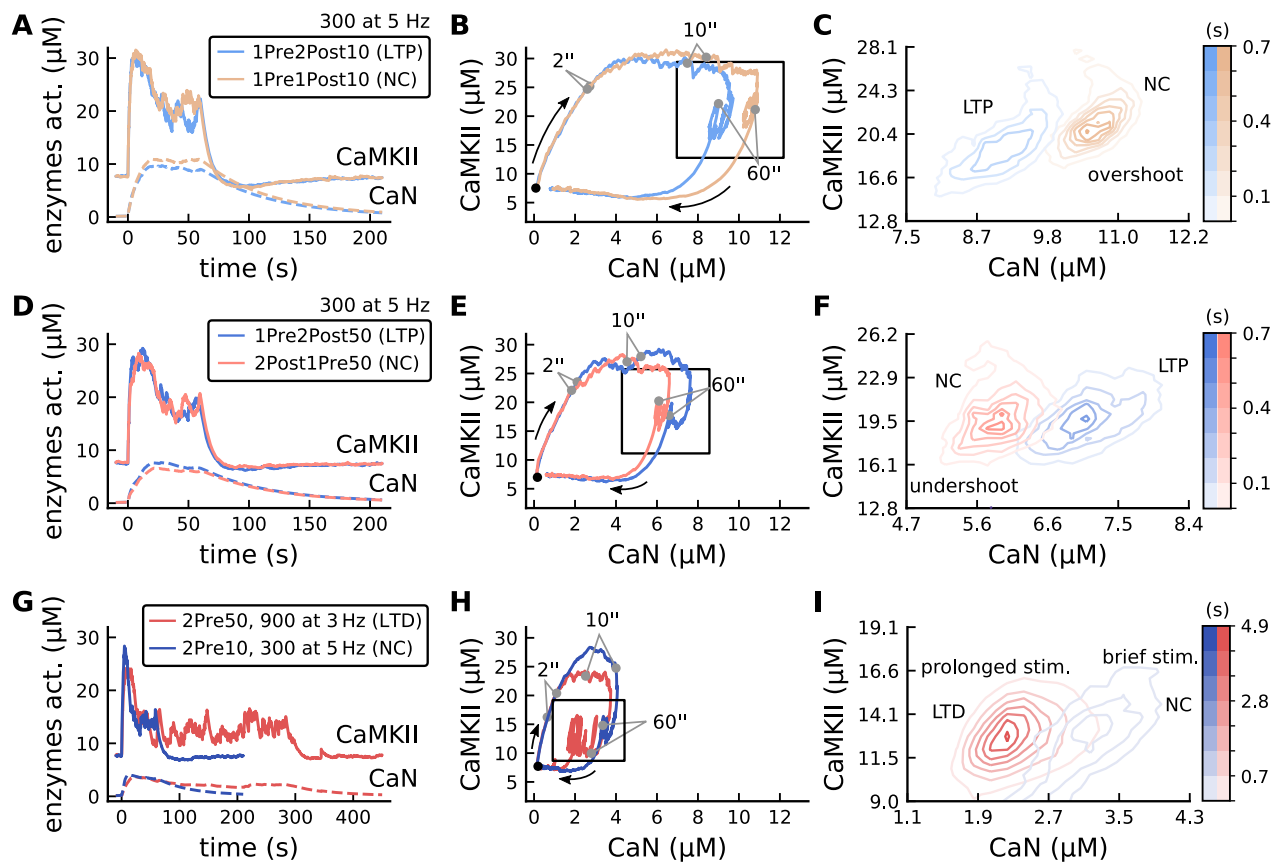

**Figure 2. The duration and amplitude of the joint CaN-CaMKII activity differentiates plasticity protocols.** A) Activity of CaMKII (solid line) and CaN (dashed line) ( $\mu\text{M}$ ) for two protocols. Experimentally the 1Pre2Post10 produces LTP, and 1Pre1Post10 produces no change (NC). Both are composed of 300 pairing repetitions delivered at 5 Hz. B) Joint enzymatic activity (CaN-CaMKII) for the protocols in panel A. The black dot indicates the initial resting activity and the arrows show the trajectory direction as function of time. The grey points mark the time position (x-axis in panel A) for both protocols at 2, 10 and 60 s (when the stimulation stops). The black square is the zoomed region in panel C. C) The mean time spent (colorbar) for each protocol in panel B (100 samples for each protocol for panels C, F and I). D) Same as in panel A, but for the LTP protocol, 1Pre2Post50 and, the NC protocol, 2Post1Pre50. Both are composed of 300 pairing repetitions at 5 Hz. E) Same as in panel B for protocols in panel D. F) The mean time spent (colorbar) for each protocol in panel E. G) Same as in panel A and D, but for two protocols with different frequencies and pulse repetitions. The LTD protocol, 2Pre50 900 at 3 Hz and, the NC protocol 2Pre10 300 at 5 Hz. H) Same as in panel B and E for protocols in panel G. I) The mean time spent (colorbar) for each protocol in panel H.

### A geometrical readout mapping joint enzymatic activity to plasticity outcomes

We found that the simulated CaN-CaMKII trajectories from the two LTP-inducing protocols (1Pre2Post10 and 1Pre2Post50, at Figure 2A and 2D respectively) spent a large fraction of time near  $\sim 20 \mu\text{M}$  CaMKII and 7–10  $\mu\text{M}$  CaN. In contrast, protocols that failed to trigger LTP had either lower (2Post1Pre50 and 2Pre10, Figure 2D and 2G respectively), or higher CaMKII and CaN activation (1Pre1Post10, Figure 2A). The LTD-inducing protocol, by comparison, spent a longer period in a region of sustained but lower  $\sim 12 \mu\text{M}$  CaMKII and  $\sim 2 \mu\text{M}$  CaN and activation. The plots in Figure 2C, F and G show contour maps of histograms of the joint CaMKII-CaN activity, indicating where in the plane the trajectories spent most time. Figures 2C and F indicate this measure can be used to predict plasticity, because the NC and LTP protocol histograms are largely non-overlapping. In Figure 2C, the NC protocol response ‘overshoots’ the LTP protocol response, whereas in Figure 2F the NC protocol response ‘undershoots’ the LTP

protocol response. In contrast, when we compared the response histograms for LTD and NC protocols, we found a greater overlap (Figure 2I). This suggested that in this case the histogram alone was not sufficient to separate the protocols, and that protocol duration is also important. LTD induction (2Pre50) required a more prolonged activation than NC (2Pre10).

To design a geometrical readout mechanism to map the enzyme activity to plasticity outcomes, we first drew non-overlapping boxes of LTP and LTD “plasticity regions” in the CaN-CaMKII plane (Figure 3A). We positioned these regions over the parts of the phase space where the enzyme activities corresponding to the LTP- and LTD-inducing protocols were most different, as shown by trajectories in Figure 2. We then fixed these regions for all subsequent parts of this study. When a trajectory enters in one of these plasticity regions, it activates LTD or LTP indicator variables (Methods) which encode the joint enzyme activities (trajectories in the phase plots) transitions across the LTP and LTD regions over time (Figure 3B). These indicator variable drove

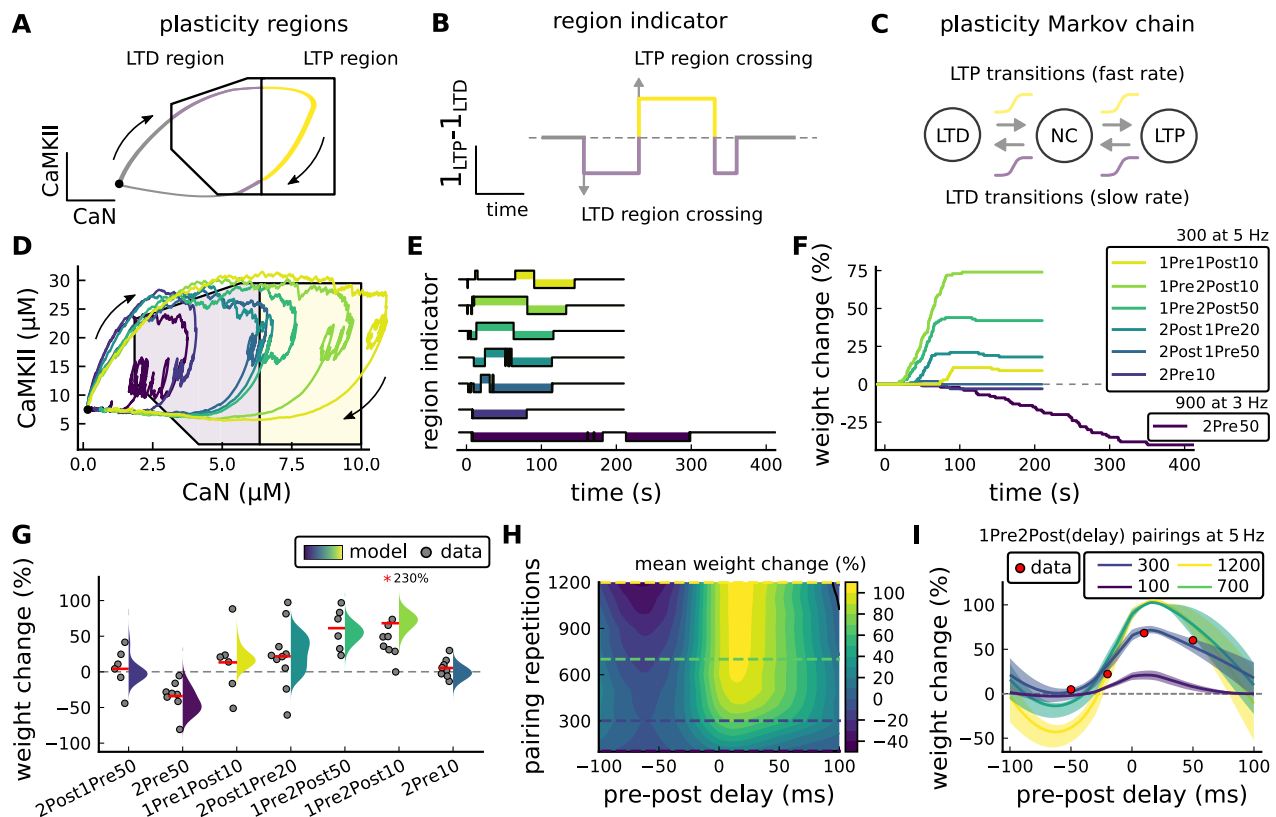

**Figure 3. Read-out strategy an Tigaret et al. (2016) experiment.** **A)** Illustration of the joint CaMKII and CaN activities crossing the plasticity regions. Arrows indicate the flow of time, starting at the black dot. Note that here time is hidden and one can only see the changes in enzyme concentrations. **B)** Region indicator showing when CaN and CaMKII crosses the LTD or LTP regions in panel A. Leaving the region activates a leaking mechanism that keeps track of the accumulated time inside the region. Such leaking mechanism drives the transition rates used to predict plasticity (Methods). **C)** Plasticity Markov chain with three states: LTD, LTP and NC. There are only two transition rates which are functions of the plasticity region indicator (Methods). The LTP transition is fast whereas the transition LTD is slow, meaning that LTD change requires longer time inside the LTD region (panel A). The NC state starts with 100 processes. **D)** Joint CaMKII and CaN activity for all Tigaret protocols (labelled in F). The stimulus ends when the trajectory becomes smooth. Corresponds to Figure 2B,E,H, at 60 s. **E)** Region indicator for the protocols labelled in F. The upper square bumps are caused by the protocol crossing the LTP region, the lower square bumps when the protocol crosses the LTD region (as in panel D). **F)** Synaptic weight (%) as function of time for each protocol. The weight change is defined as the number (out of 100) of states in the LTP state minus the number of states in the LTD state (panel C). The trajectories correspond to the median of the simulations in panel G. **G)** Synaptic weight change (%) predicted by the model compared to data (EPSC amplitudes) from Tigaret et al. (2016) (100 samples for each protocol, also for panel H and I). The data (grey dots) was provided by Tigaret et al. (2016) (note an 230% outlier as the red asterisk), red bands indicate data means. **H)** Predicted mean synaptic weight change (%) as function of delay (ms) and number of pairing repetitions (pulses) for the protocol 1Pre2Post(delay), for delay between -100 and 100. LTD is induced by 2Post1Pre50 after at least 500 pulses. The mean weight change along each dashed line is reported in the STDP curves in panel I. **I)** Synaptic weight change (%) as function of pre-post delay. Each plot corresponds to a different pairing repetition number (legend). The solid line shows the mean, and the ribbons are the 2nd and 4th quantiles. The red dots are the data means estimated in Tigaret et al. (2016), also shown in panel G.

transition rates in a plasticity Markov chain used to predict LTP or LTD (Figure 3C), see Methods. The LTD transition rates were slower than the LTP transition rates, to reflect studies showing that LTD requires sustained synaptic stimulation (Yang et al., 1999; Mizuno et al., 2001; Wang et al., 2005). The parameters for this plasticity Markov chain (Methods) were fit to the plasticity induction outcomes from different protocols (Table M1). In the beginning of the simulation, the plasticity Markov chain starts with 100 processes (Destexhe et al., 1998) in the state NC, with each variable representing 1% weight change, an abstract measure of synaptic strength that can be either EPSP, EPSC, or field EPSP slope depending on the experiment. Each process can transit stochastically between NC, LTP and LTD states. At the end of the protocol, the plasticity outcome is given by the difference between the number of processes in the LTP and the LTD states (Methods).

This readout mechanism acts as a parsimonious model of the complex signalling cascade linking CaMKII and CaN activation to expression of synaptic plasticity (He et al., 2015). It can be considered as a two-dimensional extension of previous computational studies that applied analogous 1D threshold functions to dendritic spine calcium concentration (Shouval et al., 2002; Karmarkar and Buonomano, 2002; Graupner and Brunel, 2012; Standage et al., 2014). Our model is scalable, as it gives the possibility for the readout to be extended to dynamics of  $n$  different molecules, using  $n$ -dimensional closed regions.

In Figure 3D, we plot the model's responses to seven different plasticity protocols used by Tigaret et al. (2016) by overlaying example CaMKII-CaN trajectories for each protocol with the LTP and LTD regions. The corresponding region occupancies are plotted as function of time in 3E, and long-term alterations in the synaptic

strength are plotted as function of time in 3F. The three protocols that induced LTP in the Tigaret et al. (2016) experiments spent substantial time in the LTP region, and so triggered potentiation. In contrast, the 1Pre1Post10 (yellow trace) overshoots both regions, crossing them only briefly on its return to baseline, and so resulted in little weight change. The protocol that induced LTD (2Pre50, purple trace) is five times longer than other protocols, spending sufficient time inside the LTD region (Figure 3F). In contrast, two other protocols that spent time in the same LTD region of the CaN-CaMKII plane (2Post1Pre50 and 2Pre10) were too brief to induce LTD. These protocols were also not strong enough to reach the LTP region, so resulted in no net plasticity, again consistent with Tigaret et al. (2016)'s experiments.

We observed run-to-run variability in the amplitude of the predicted plasticity, due to the inherent stochasticity in the model. In Figure 3G, we plot the distribution of the predicted plasticity from each protocol (colours) alongside the data from Tigaret et al. (2016)'s study, finding a good correspondence.

Experimentally, LTP can be induced by few pulses while LTD usually requires longer-duration stimulation (Yang et al., 1999; Mizuno et al., 2001; Wang et al., 2005). We incorporated this effect into the readout model by letting LTP have faster transition rates than LTD (Figure 3C). Tigaret et al. (2016) found that 300 repetitions of anticausal post-before-pre pairings did not cause LTD, in contrast to the canonical spike-timing-dependent plasticity curve (Bi and Poo, 1998). We hypothesized that LTD might indeed appear with the anticausal Tigaret et al. (2016) protocol (Table M1) if stimulation duration was increased. To explore this possibility in the model, we systematically varied the number of paired repetitions from 100 to 1200, and also co-varied the pre-post delay from -100 to 100 ms. Figure 3H shows a contour plot of the predicted mean synaptic strength change across for the 1Pre2Post(delay) stimulation protocol for different numbers of pairing repetitions. A LTD window appears after ~500 pairing repetitions for some anticausal pairings, in line with our hypothesis. The magnitude of LTP also increases with pulse number, for causal positive pairings. For either 100 or 300 pairing repetitions, only LTP or NC is induced (Figure 3I). The model also made other plasticity predictions by varying Tigaret et al. (2016)'s experimental conditions (Figure S1). In summary, our model readout reveals that the direction and magnitude of the change in synaptic strength can be predicted from the joint CaMKII-CaN activity in the LTP and LTD regions.

### Frequency-dependent plasticity

The stimulation protocols used by Tigaret et al. (2016) explored how subtle variations in pre and postsynaptic spike timing influenced the direction and magnitude of plasticity (see Table M1 for experimental differences).

In contrast, traditional synaptic plasticity protocols exploring the role of presynaptic stimulation frequency did not measure the timing of co-occurring postsynaptic spikes (Dudek and Bear, 1992; Wang and Wagner, 1999; Kealy and Commins, 2010). These studies found that long-duration low-frequency stimulation induces LTD, whereas short-duration high-frequency stimulation induces LTP, with a cross-over point of zero change at intermediate stimulation frequencies. In addition to allowing us to explore frequency-dependent plasticity (FDP), this stimulation paradigm also gives us further constraints for LTD in the model since in Tigaret et al. (2016), only one LTD case was available. For FDP, we focused on modelling the experiments from Dudek and Bear (1992), who stimulated Schaffer collateral projections to pyramidal CA1 neurons with 900 pulses in frequencies ranging from 1 Hz to 50 Hz. In addition to presynaptic stimulation patterns, the experimental conditions differed from Tigaret et al. (2016) in two other aspects: animal age and control of postsynaptic spiking activity (see Table M1 legend). We incorporated both age-dependence and EPSP-evoked-BaPs (Methods). Importantly, the read-out mechanism mapping joint CaMKII-CaN activity to plasticity is the same for all experiments in this work.

Figure 4A shows the joint CaMKII-CaN activity when we stimulated the model with 900 presynaptic spikes at 1, 3, 5, 10 and 50 Hz (Dudek and Bear, 1992). Higher stimulation frequencies drove stronger responses in both CaN and CaMKII activities (Figure 4A). Figure 4B and C show the corresponding plasticity region indicator for the LTP/LTD region threshold crossings (panel B) and the eventual synaptic strength change (panel C). From this set of five protocols, only the 50 Hz stimulation drove a response strong enough to reach the LTP region of the plane (Figure 4A and D). Although the remaining four protocols drove responses primarily in the LTD region, only the 3 and 5 Hz stimulations resulted in substantial LTD. The 1 Hz and 10 Hz stimulations resulted in negligible LTD, but for two distinct reasons. Although the 10 Hz protocol's joint CaMKII-CaN activity passed through the LTD region of the plane (Figure 4A,D), it was too brief to activate the slow LTD mechanism built into the readout (Methods). The 1 Hz stimulation, on the other hand, was prolonged, but its response was mostly too weak to reach the LTD region, crossing the threshold only intermittently (Figure 4B, bottom trace). Overall the model matched well the mean plasticity response found by Dudek and Bear (Figure 4E), following a classic BCM-like curve as function of stimulation frequency (Abraham et al., 2001; Bi-ennenstock et al., 1982).

We then used the model to explore the stimulation space in more detail by varying the stimulation frequency from 0.5 Hz to 50 Hz, and varying the number of presynaptic pulses from 50 to 1200. Figure 4F shows

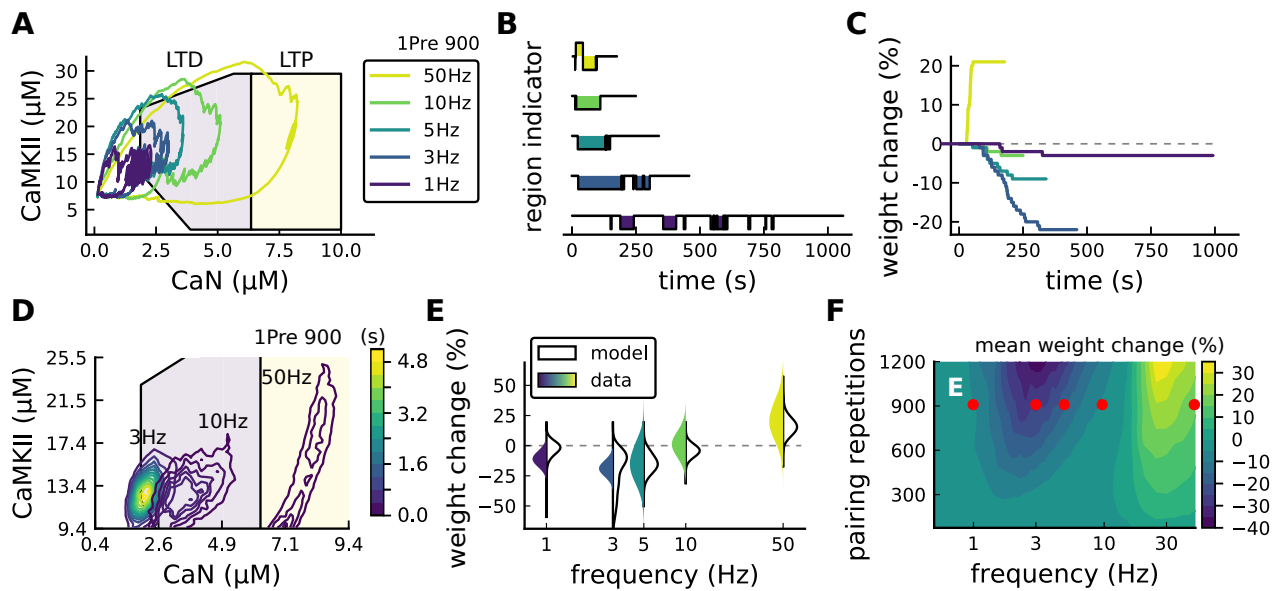

**Figure 4. Frequency dependent plasticity, Dudek and Bear (1992) dataset.** **A**) Example traces of joint CaMKII-CaN activity for each of Dudek and Bear (1992)'s protocols. **B**) Region indicator showing when the joint CaMKII-CaN activity crosses the LTD or LTP regions for each protocol in panel A. **C**) Synaptic weight change (%) as function of time for each protocol, analogous to Figure 3C. Trace colours correspond to panel A. The trajectories displayed were chosen to match the medians in panel E. **D**) Mean (100 samples) time spent (s) for protocols 1Pre 900 for 900 pairing repetitions at 3, 10 and 50 Hz. **E**) Comparison between data from Dudek and Bear (1992) and our model (1Pre 900p, 300 samples per frequency, Table M1). Data are represented as normal distributions with the mean and variance extracted from Dudek and Bear (1992). Note that data from Dudek and Bear are given in field EPSP slope change. **F**) Prediction for the mean weight change (%) varying the stimulation frequency and pulse number (24x38x100 data points, respectively pulse x frequency x samples). The red dots show the Dudek and Bear (1992) protocol parameters, the corresponding results are shown in panel E.

a contour map of the mean synaptic strength change (%) in this 2D frequency–pulse number space. Under Dudek and Bear (1992)'s experimental conditions, we found that LTD induction required at least ~300 pulses, at frequencies between 1Hz and 3Hz. In contrast, LTP could be induced using ~50 pulses at ~20Hz or greater. The contour map also showed that increasing the number of pulses (vertical axis in Figure 4E) increases the magnitude of both LTP and LTD. This was paralleled by a widening of the LTD frequency range, whereas the LTP frequency threshold remained around ~20Hz, independent of pulse number. The pulse dependence amplitude increase predicted in Figure 4 is also valid for Tigaret et al. (2016) experiment shown in Figures S1F.

Dudek and Bear (1992)'s *ex vivo* experiments were done at 35°C. However, lower temperatures are more widely used *ex vivo* because they extend brain slice viability. We performed further simulations testing temperature modifications for Dudek and Bear (1992)'s experiment, finding that it had a strong effect on plasticity outcomes (Figure S2D–F).

### Variations in plasticity induction with developmental age

The rules for induction of LTP and LTD change during development (Dudek and Bear, 1993; Cao and Harris, 2012), so a given plasticity protocol can produce different outcomes when delivered to synapses from young animals versus mature animals. For example, when Dudek and Bear (1993) tested the effects of low-frequency stimulation (1 Hz) on CA3-CA1 synapses

from rats of different ages, they found that the magnitude of LTD decreases steeply with age from P7 until becoming minimal in mature animals >P35 (Figure 5A, circles). Across the same age range, they found that a theta-burst stimulation protocol induced progressively greater LTP magnitude with developmental age (Figure 5B, circles). Paralleling this, multiple properties of neurons change during development: the NMDAR switches its dominant subunit expression from GluN2B to GluN2A (Sheng et al., 1994; Popescu et al., 2004; Iacobucci and Popescu, 2017), the reversal potential of the receptor (GABA<sub>A</sub>) switches from depolarising to hyperpolarising (Rivera et al., 1999; Meredith et al., 2003; Rinetti-Vargas et al., 2017), and the action potential back-propagates more efficiently with age (Buchanan and Mellor, 2007). These mechanisms have been proposed to underlie the developmental changes in synaptic plasticity rules because they are key regulators of synaptic calcium signalling (Meredith et al., 2003; Buchanan and Mellor, 2007; Sanz-Clemente et al., 2013). However, their sufficiency and individual contributions to the age-related plasticity changes are unclear. We incorporated these mechanisms in the model (Methods) by parameterizing each of the three components to vary with the animal's postnatal age, to test if they could account for the age-dependent plasticity data.

We found that elaborating the model with age-dependent changes in NMDAR composition, GABA<sub>A</sub> reversal potential, and BaP efficiency, while keeping the same plasticity readout parameters, was sufficient to



account for the developmental changes in LTD and LTP observed by [Dudek and Bear \(1993\)](#) (Figure 5A,B). We then explored the model's response to protocols of various stimulation frequencies, from 0.5 to 50 Hz, across ages from P5 to P80 (Figure 5C,E). Figure 5C shows the synaptic strength change as function of stimulation frequency for ages P15, P25, P35 and P45. The magnitude of LTD decreases with age, while the magnitude of LTP increases with age. Figure 5E shows a contour plot of the same result, covering the age-frequency space.

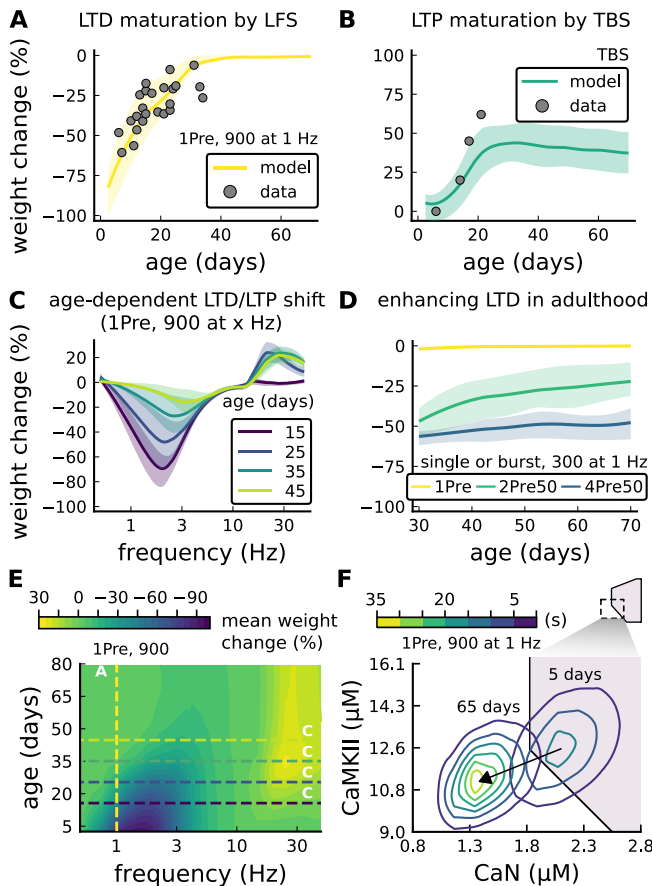

**Figure 5. Age-dependent plasticity, [Dudek and Bear \(1993\)](#) dataset** **A)** Synaptic weight change for 1Pre, 900 at 1 Hz as in [Dudek and Bear \(1993\)](#). The solid line is the mean and the ribbons are the 2nd and 4th quantiles predicted by our model (same for panel B, C and F). **B)** Synaptic weight change for Theta Burst Stimulation (TBS - 4Pre at 100 Hz repeated 10 times at 5Hz given in 6 epochs at 0.1Hz (Table M1) and [Dudek and Bear \(1993\)](#). **C)** Synaptic weight change as function of frequency for different ages. BCM-like curves showing that, during adulthood, the same LTD protocol becomes less efficient. It also shows that high-frequencies are inefficient at inducing LTP before P15. **D)** Synaptic weight change as function of age. Proposed protocol using presynaptic bursts to recover LTD at  $\geq$  P35 with less pulses, 300 instead of the original 900 from [Dudek and Bear \(1993\)](#). This effect is more pronounced for young rats. Figure S3 shows a 900 pulses comparison. **E)** Mean synaptic strength change (%) as function of frequency and age for 1Pre 900 pulses (32x38x100, respectively, for frequency, age and samples). The protocols in [Dudek and Bear \(1993\)](#) (panel A) are marked with the yellow vertical line. The horizontal lines represent the experimental conditions of panel C. Note the P35 was used for [Dudek and Bear \(1992\)](#) experiment in Figure 4E,F. **F)** Mean time spent for the 1Pre 1Hz 900 pulses protocol showing how the trajectories are left-shifted as rat age increases.

The 1Hz presynaptic stimulation protocol in [Dudek and Bear \(1993\)](#) did not induce LTD in adult animals ([Dudek and Bear, 1992](#)). We found that the joint CaN-

CaMKII activity trajectories for this stimulation protocol underwent an age-dependent leftward shift beyond the LTD region (Figure 5F). This implies that LTD is not induced in mature animals by this conventional LFS protocol due to insufficient activation of enzymes. In contrast, [Tigaret et al. \(2016\)](#) and [Isaac et al. \(2009\)](#) were able to induce LTD in adult rat tissue by combining LFS with presynaptic spike pairs repeated 900 times at 3 Hz. Given these empirical findings and our modelling results, we hypothesized that LTD induction in adult animals requires that the stimulation protocol: 1) causes CaMKII and CaN activity to stay more in the LTD region than the LTP region, and 2) is sufficiently long to activate the LTD readout mechanism. With experimental parameters used by [Dudek and Bear \(1993\)](#), this may be as short as 300 pulses when multi-spike presynaptic protocols are used since the joint CaMKII-CaN activity can reach the LTD region more quickly than for single spike protocols. We simulated two such potential protocols as predictions: doublet and quadruplet spike groups delivered 300 times at 1 Hz, with 50 ms between each pair of spikes in the group (Figure 5D). The model predicted that both these protocols induce LTD in adults (green and blue curves), whereas as shown above, the single pulse protocol did not cause LTD (yellow curve). These findings suggest that the temporal requirements for inducing LTD may not be as prolonged as previously assumed, since they can be reduced by varying stimulation intensity. See Figure S3 for frequency versus age maps for presynaptic bursts.

[Dudek and Bear \(1993\)](#) also performed theta-burst stimulation (TBS, Table M1) at different developmental ages, and found that LTP is not easily induced in young rats (Figure 5B), see also ([Cao and Harris, 2012](#)). The model qualitatively matches this trend, and also predicts that TBS induces maximal LTP around P21, before declining further during development (Figure 5B, green curve). Similarly, we found that high-frequency stimulation induces LTP only for ages  $>$ P15, peaks at P35, then gradually declines at older ages (Figure 5E). Note that in Figure 5B, we used 6 epochs instead of 4 used by [Dudek and Bear \(1993\)](#) to increase LTP outcome which is known to washout after one hour for young rats ([Cao and Harris, 2012](#)).

In contrast to [Dudek and Bear \(1993\)](#)'s findings, other studies have found that LTP can be induced in hippocampus in young animals ( $<$ P15) with STDP. For example, [Meredith et al. \(2003\)](#) found that at room temperature, 1Pre1Post10 induces LTP in young rats, whereas 1Pre2Post10 induces NC. This relationship was inverted for adults, with 1Pre1Post inducing no plasticity and 1Pre2Post10 inducing LTP (Figure S5).

Together, these results suggest that not only do the requirements for LTP/LTD change with age, but also that these age-dependencies are different for different stimulation patterns. Finally, we explore which mecha-

nisms are responsible for plasticity induction changes across development in the FDP protocol (Figure S3) by fixing each parameter to young or adult values for the FDP paradigm. Our model analysis suggests that the NMDAR switch (Iacobucci and Popescu, 2017) (Methods) is a dominant factor affecting LTD induction, but the maturation of BaP (Buchanan and Mellor, 2007) is the dominant factor affecting LTP induction, with GABA<sub>r</sub> shift having only a weak influence on LTD induction for Dudek and Bear (1993)'s FDP.

Plasticity requirements during development do not necessarily follow the profile in Dudek and Bear (1993) as shown by Meredith et al. (2003)'s STDP experiment. Our model shows that multiple developmental profiles are possible when experimental conditions vary within the same stimulation paradigm. This is illustrated in Figure S5A-C by varying the age of STDP experiments done in different conditions.

### Effects of extracellular calcium and magnesium concentration on plasticity

The canonical STDP rule (Bi and Poo, 1998) measured in cultured neurons, high  $[Ca^{2+}]_o$ , and at room temperature, was recently found not to be reproducible at physiological  $[Ca^{2+}]_o$  in CA1 brain slices (Inglebert et al., 2020). Instead, by varying the  $[Ca^{2+}]_o$  and  $[Mg^{2+}]_o$  they found a spectrum of STDP rules with either no plasticity or full-LTD for physiological  $[Ca^{2+}]_o$  conditions ( $[Ca^{2+}]_o < 1.8$  mM) and a bidirectional rule for high  $[Ca^{2+}]_o$  ( $[Ca^{2+}]_o > 2.5$  mM), shown in Figure 6A-C (data).

We attempted to reproduce Inglebert et al. (2020)'s findings by varying  $[Ca^{2+}]_o$  and  $[Mg^{2+}]_o$  with the following consequences for the model mechanisms (Methods). On the presynaptic side,  $[Ca^{2+}]_o$  modulates vesicle release probability. On the postsynaptic side, high  $[Ca^{2+}]_o$  reduces NMDAR conductance (Maki and Popescu, 2014), whereas  $[Mg^{2+}]_o$  affects the NMDAR  $Mg^{2+}$  block (Jahr and Stevens, 1990). Furthermore, spine  $[Ca^{2+}]_o$  influx activates SK channels, which hyperpolarize the membrane and indirectly modulate NMDAR activity (Ngo-Anh et al., 2005; Griffith et al., 2016).

Figure 6A-C compares our model to Inglebert et al. (2020)'s STDP data at different  $[Ca^{2+}]_o$  and  $[Mg^{2+}]_o$ . Note that Inglebert et al. (2020) used 150 (100) pairing repetitions for the anti-causal (causal) both delivered at 0.3 Hz. At  $[Ca^{2+}]_o=1.3$  mM, Figure 6A shows the STDP rule induced weak LTD for brief causal delays. At  $[Ca^{2+}]_o=1.8$  mM, in Figure 6B, the model predicted a full-LTD window. At  $[Ca^{2+}]_o=3$  mM, in Figure 6C, it predicted a bidirectional rule with a second LTD window for long pre-before-post pairings, previously theorized by Rubin et al. (2005).

Figure 6D illustrates the time spent by the joint CaN-CaMKII activity for 1Pre1Post10 using Inglebert et al. (2020)'s experimental conditions. Each density plot cor-

responds to a different panel in Figure 6 with the respective Ca/Mg. The response under low  $[Ca^{2+}]_o$  spent most time inside the LTD region, but high  $[Ca^{2+}]_o$  shifts the trajectory to the LTP region. Figure S4A presents density plots for the anticausal post-before-pre protocols.

Inglebert et al. (2020) fixed the Ca/Mg ratio at 1.5, although aCSF formulations in the literature differ (see Table M1). Figure S4D shows that varying Ca/Mg ratio and  $[Ca^{2+}]_o$  for Inglebert et al. (2020)'s experiments restrict LTP to  $Ca/Mg > 1.5$  and  $[Ca^{2+}]_o > 1.8$  mM.

Our model can also identify the transitions between LTD and LTP depending on Ca/Mg. Figure 6E shows a map of plasticity as function of pre-post delay and Ca/Mg concentrations and the parameters where LTP is induced for the 1Pre1Post10 protocol. Since plasticity rises steeply at around  $[Ca^{2+}]_o=2.2$  mM, small fluctuations in  $[Ca^{2+}]_o$  near this boundary could cause qualitative transitions in plasticity outcomes. For anticausal pairings, increasing  $[Ca^{2+}]_o$  increases the magnitude of LTD (Figure S4B illustrates this with Inglebert et al. (2020)'s data).

Inglebert et al. (2020) also found that increasing the pairing frequency to 5 or 10 Hz results in a transition from LTD to LTP for 1Pre1Post10 at  $[Ca^{2+}]_o=1.8$  mM (Figure S4C), similar frequency-STDP behaviour has been reported in cortex (Sjöström et al., 2001). In Figure 6F, we varied both the pairing frequencies and  $[Ca^{2+}]_o$  and we observe similar transitions to Inglebert et al. (2020). However, the model's transition for  $[Ca^{2+}]_o=1.8$  mM was centred around 0.5 Hz, which was untested by Inglebert et al. (2020). The model predicted no plasticity at higher frequencies, unlike the data, that shows scattered LTP and LTD (see Figure S4C). Figure S1D and S4E shows that Tigaret et al. (2016)'s burst-STDP and Inglebert et al. (2020)'s STDP share a similar transition structure, but not Dudek and Bear (1992)'s FDP.

In contrast to Inglebert et al. (2020)'s results, we found that setting low  $[Ca^{2+}]_o$  for Tigaret et al. (2016)'s burst-STDP abolishes LTP, and does not induce strong LTD (Figure S1D).

For Dudek and Bear (1992)'s experiment, Figure S2A  $[Mg^{2+}]_o$  controls a sliding threshold between LTD and LTP but not  $[Ca^{2+}]_o$  (Figure S2B). For another direct stimulation experiment, Figure S4C shows that in an Mg-free medium, LTP expression requires fewer pulses (Mizuno et al., 2001).

Despite exploring physiological  $[Ca^{2+}]_o$  and  $[Mg^{2+}]_o$  Inglebert et al. (2020) use a non-physiological temperature (30°C) which extends T-type VGCC closing times and modifies the CaN-CaMKII baseline (Figure S5I). Figure S5G,H shows comparable simulations for physiological temperatures. Overall our model predicts that temperature can change STDP rules in a similar fashion to  $[Ca^{2+}]_o$  (Figure S4A,B). In summary, plasticity is highly sensitive to variations in extracellular calcium,

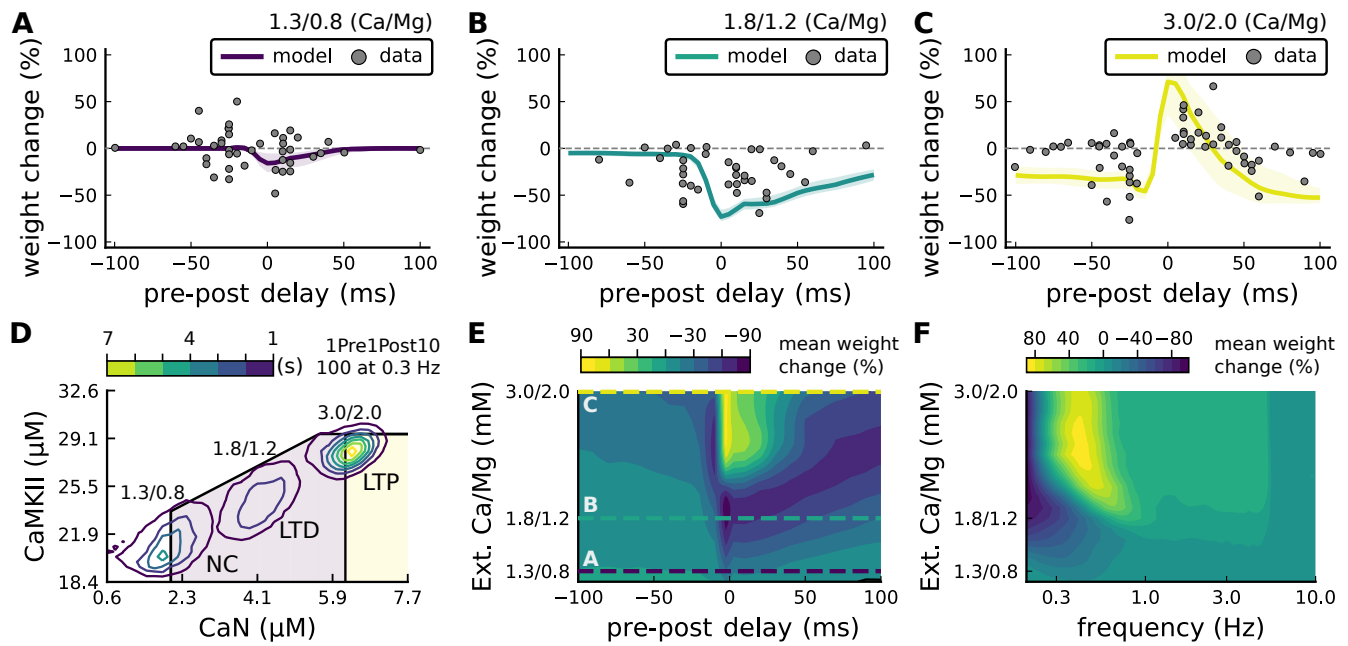

**Figure 6. Effects of extracellular calcium and magnesium concentrations on plasticity** A) Synaptic weight (%) for a STDP rule with  $[\text{Ca}^{2+}]_o = 1.3 \text{ mM}$  (fixed ratio,  $\text{Ca}/\text{Mg}=1.5$ ). According to the data extracted from Inglebert et al. (2020), the number of pairing repetitions for positive (negative) delays is 100 (150), both delivered at 0.3 Hz (Inglebert et al., 2020). The solid line is the mean, and the ribbons are the 2nd and 4th quantiles predicted by our model (all panels use 100 samples). B) Same as A, but for  $[\text{Ca}^{2+}]_o = 1.8 \text{ mM}$  ( $\text{Ca}/\text{Mg}$  ratio = 1.5). C) Same as A, but for  $[\text{Ca}^{2+}]_o = 3 \text{ mM}$  ( $\text{Ca}/\text{Mg}$  ratio = 1.5). D) Mean time spent for causal pairing, 1Pre1Post10, at different Ca/Mg concentrations. The contour plots are associated with the panels A, B and C. E) STDP and extracellular Ca/Mg. Synaptic weight change (%) for causal (1Pre1Post10, 100 at 0.3 Hz) and anticausal (1Post1Pre10, 150 at 0.3 Hz) pairings varying extracellular Ca from 1.0 to 3 mM ( $\text{Ca}/\text{Mg}$  ratio = 1.5). The dashed lines represent the experiments in the panel A, B and C. We used  $21 \times 22 \times 100$  data points, respectively calcium x delay x samples. F) Varying frequency and extracellular Ca/Mg for the causal pairing 1Pre1Post10, 100 at 0.3 Hz. Contour plot showing the mean synaptic weight (%) for a single causal pairing protocol (1Pre1Post10, 100 samples) varying frequency from 0.1 to 10 Hz and  $[\text{Ca}^{2+}]_o$  from 1.0 to 3 mM ( $\text{Ca}/\text{Mg}$  ratio = 1.5). We used  $21 \times 18 \times 100$  data points, respectively calcium x frequency x samples.

magnesium, and temperature (Figure S1A, Figure S5D-F; Wittenberg and Wang (2006)).

### In vivo-like spike variability affects plasticity

In the above sections, we used highly regular and stereotypical stimulation protocols to replicate typical *ex vivo* plasticity experiments. In contrast, neural spiking in hippocampus *in vivo* is irregular and variable (Fenton and Muller, 1998; Isaac et al., 2009). It is unclear how natural firing variability affects the rules of plasticity induction (Rackham et al., 2010; Graupner et al., 2016; Bittner et al., 2017; Cui et al., 2018). We explored this question using model simulations by adding three distinct types of variability: 1) spike time jitter, 2) failures induced by dropping spikes, 3) independent pre and postsynaptic Poisson spike trains (Graupner et al., 2016).

We introduced spike timing jitter by adding zero-mean Gaussian noise (s.d.  $\sigma$ ) to pre and postsynaptic spikes, changing spike pairs inter-stimulus interval (ISI). In Figure 7A, we plot the LTP magnitude as function of jitter magnitude (controlled by  $\sigma$ ) for protocols taken from Tigaret et al. (2016). With no jitter,  $\sigma = 0$ , these protocols have different LTP magnitudes (corresponding to Figure 3) and become similar once  $\sigma$  increases. The three protocols with a postsynaptic spike doublet gave identical plasticity for  $\sigma = 50 \text{ ms}$ .

To understand the effects of jittering, we plotted the trajectories of CaN-CaMKII activity (Figure 7C).

2Post1Pre50 which "undershoots" the LTP region shifted into the LTP region for jitter  $\sigma = 50 \text{ ms}$ . In contrast, 1Pre1Post10 which "overshoots" the LTP region shifted to the opposite direction towards the LTP region.

Why does jitter cause different spike timing protocols to yield similar plasticity magnitudes? Increasing jitter causes a fraction of pairings to invert causality. Therefore, the jittered protocols became a mixture of causal and anticausal pairings (Figure 7C). This situation occurs for all paired protocols. So any protocol with the same number spikes will become mixed if the jitter is large enough. Note that despite noise the mean frequency was conserved at  $5 \pm 13.5 \text{ Hz}$  (see Figure 7E).

Next, we studied the effect of spike removal. In the previous sections, synaptic release probability was  $\sim 60\%$  (for  $[\text{Ca}^{2+}]_o = 2.5 \text{ mM}$ ) or lower, depending on the availability of docked vesicles (Methods). However, baseline presynaptic vesicle release probability is heterogeneous across CA3-CA1 synapses, ranging from  $\sim 10 - 90\%$  (Dobrunz et al., 1997; Enoki et al., 2009) and likely lower on average *in vivo* (Borst, 2010). BaPs are also heterogeneous with random attenuation profiles (Golding et al., 2001) and spike failures (Short et al., 2017). To test the effects of pre and postsynaptic failures on plasticity induction, we performed simulations where we randomly removed spikes, altering the previously regular attenuation in Tigaret et al. (2016)'s proto-

cols.

In Figure 7B we plot the plasticity magnitude as function of sparsity (percentage of removed spikes). The sparsity had different specific effects for each protocol. 1Pre2Post10 and 1Pre2Post50 which originally produced substantial LTP were robust to spike removal until ~60% sparsity. In contrast, the plasticity magnitude from both 1Pre1Post10 and 2Post1Pre50 showed a non-monotonic dependence on sparsity, first increasing then decreasing, with maximal LTP at ~40% sparsity.

To understand how sparsity causes this non-monotonic effect on plasticity magnitude, we plotted the histograms of time spent in the CaN-CaMKII plane for 2Post1Pre50 for three levels of sparsity: 0%, 30% and 80% (Figure 7D). For 0% sparsity, the activation spent most time at the border between the LTP and LTD regions, resulting in no plasticity. Increasing sparsity to 30% caused the activation to shift rightward into the LTP region because there was less attenuation of pre and postsynaptic resources. In contrast, at 80% sparsity, the activation moved into the LTD region because there were not enough events to substantially activate CaMKII and CaN. Since LTD is a slow process and the protocol duration is short (60s), there was no net plasticity. Therefore for this protocol, high and low sparsity caused no plasticity for distinct reasons, whereas intermediate sparsity enabled LTP by balancing resource depletion with enzyme activation.

Next we tested the interaction of jitter and spike removal. Figure 7F shows a contour map of weight change as function of jitter and sparsity for the 2Post1Pre50 protocol, which originally induced no plasticity (Figure 2). Increasing spike jitter enlarged the range of sparsity inducing LTP. In summary, these simulations (Figure 7A,B, F and H) show that different STDP protocols have different degrees of sensitivity to noise in the firing structure, suggesting that simple plasticity rules derived from regular *ex vivo* experiments may not predict plasticity *in vivo*.

How does random spike timing affect rate-dependent plasticity? We stimulated the model with pre and postsynaptic Poisson spike trains for 10s, under Dudek and Bear (1992)'s experimental conditions. We systematically varied both the pre and postsynaptic rates (Figure 7H). The 10s stimulation protocols induced only LTP, since LTD requires a prolonged stimulation (Mizuno et al., 2001). LTP magnitude monotonically increased with the presynaptic rate (Figure 7G,H). In contrast, LTP magnitude varied non-monotonically as function of postsynaptic rate, initially increasing until a peak at 10 Hz, then decreasing with higher stimulation frequencies. This non-monotonic dependence on post-synaptic rate is inconsistent with classic rate-based models of Hebbian plasticity. We also investigated how this plasticity dependence on pre- and post-synaptic

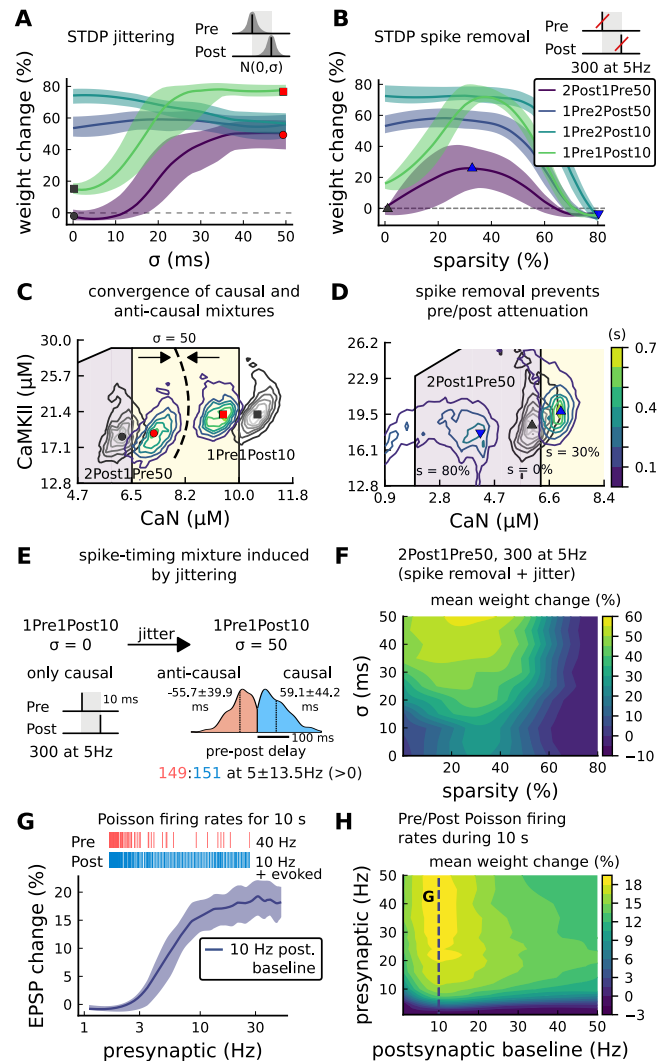

**Figure 7. Jitter and spike dropping effects on STDP, and pre and postsynaptic Poisson spike trains.** A) Synaptic weight (%) for the four STDP protocols used in Tigaret et al. (2016) varying jittering (normally distributed,  $N(0, \sigma)$ ). Burst pulses are jittered together. The solid line is the mean, and the ribbons are the 2nd and 4th quantiles predicted by our model estimated using 100 samples (same sample number for all panels). B) Synaptic weight (%) for the same Tigaret et al. (2016) protocols used at panel A subjected to random spike removal (sparsity %). (100 samples for each). C) Mean time spent (s) varying jittering. Contour plot in grey showing 2Post1Pre50 and 1Pre1Post10 (both 300 at 5 Hz) without jittering ( $\sigma=0$  ms, same as in Figure 2C and F), and with jittering ( $\sigma=50$  ms, coloured contour plot). The circles and squares correspond to the same marks in panel A. D) Mean time spent (s) (100 samples for each protocol) varying sparsity. Contour plot in grey showing 0% sparsity for 2Post1Pre50 300 at 5Hz (as in Figure 2F). The coloured contour plots show the original protocol with two different spike removal sparsities: 30% of the spikes removed at right inducing LTP, and 80% of the spikes removed at left inducing NC. The triangles correspond to the same marks in panel B. E) Schematic showing one example of 50 ms jittering applied to the causal protocol 1Pre1Post10, 300 at 5 Hz in which nearly half of the pairs turned into anticausal. The mean frequency is the same (mean of 1000/ISI),  $5 \pm 13.5$  Hz. After the jitter is applied, the causal pairings will have a delay of  $58 \pm 46.7$  ms, whereas the anticausal  $-56.6 \pm 46.7$  ms. The protocol 2Post1Pre50 will have nearly half of the pairings turning into causal, making them have a similar firing structure and position inside the LTP region. F) Mean weight change (%) combining both sparsity (panel B) and jittering (panel A) for 2Post1Pre50, 300 at 5 Hz. We used  $21 \times 17 \times 100$  data points, respectively sparsity  $\times$  jitter  $\times$  samples. G) Synaptic weight (%) of pre and postsynaptic Poisson spike train delivered simultaneously for 10 s. The plot shows the plasticity outcome for different presynaptic firing rate (1000/ frequency) for a fixed postsynaptic baseline at 10Hz. The upper raster plot depicts the released vesicles at 40 Hz and the postsynaptic baseline at 10Hz (including the AP evoked by EPSP). H) Mean weight change (%) varying the rate of pre and postsynaptic Poisson spike train delivered simultaneously for 10 s. The dashed line depicts panel G. We used  $24 \times 24 \times 100$  data points, respectively postsynaptic  $\times$  presynaptic  $\times$  samples.

Poisson firing rates varies with developmental age (Figure S2G–I). We found that at P5 no plasticity is induced, at P15 a LTP region appears at around 1 Hz postsynaptic rate, and at P20 plasticity becomes similar to the mature age, with a peak in LTP magnitude at 10 Hz postsynaptic rate.

## Discussion and conclusion

We built a model of a rat CA3-CA1 hippocampal synapse, including key electrical and biochemical components underlying synaptic plasticity induction (Figure 1). We used a novel geometric readout of CaN-CaMKII dynamics (Figure 2-4) to predict the outcomes from a range plasticity experiments with heterogeneous conditions: animal developmental age (Figure 5), aCSF composition (Figure 6), temperature (Supplemental files), and *in vivo*-like firing variability (Figure 7).

Our model includes critical components for plasticity induction at CA3-CA1 synapses: those affecting dendritic spine voltage, calcium signalling, and enzymatic activation. The model can be used to make quantitative predictions, because its variables and parameters correspond to biological components. This property allowed us to incorporate the model components' dependence on developmental age, external Ca/Mg levels, and temperature to replicate datasets across a range of experimental conditions. The model is relatively fast to simulate, taking ~1 minute of CPU time to run 1 minute of biological time. These practical benefits should enable future studies to make experimental predictions on dendritic integration of multiple synaptic inputs (Blackwell et al., 2019; Oliveira et al., 2012; Ebner et al., 2019) and on the effects of synaptic molecular alterations in pathological conditions. In contrast, abstract models based on spike timing (Song et al., 2000; Pfister and Gerstner, 2006; Clopath and Gerstner, 2010) or simplified calcium dynamics (Shouval et al., 2002; Graupner and Brunel, 2012) must rely on ad hoc adjustment of parameters with less biological interpretability.

The model builds upon the concept that the full temporal activity of CaN-CaMKII over the stimulus duration (Fujii et al., 2013), and not their instantaneous activity levels (Shouval et al., 2002; Karmarkar and Buonomano, 2002), is responsible for plasticity changes. We instantiate this concept by analyzing the joint activity in the two-dimensional plane and designing polygonal plasticity readout regions (Figure 3A) based on the geometry that CaN-CaMKII activity leaves on the plane. In doing so, we generalise previous work with plasticity induction based on single threshold and a slow variable (Badoual et al., 2006; Rubin et al., 2005; Clopath and Gerstner, 2010; Graupner and Brunel, 2012). Here, we used a two-dimensional readout, but anticipate a straightforward generalisation to higher-dimensions for different cellular processes, both in neuroscience and in systems biology. The central discovery is that these

trajectories, despite being stochastic, can be separated in the plane as function of the stimulus (Figure 3).

Let us describe the intuition behind our model more concisely. First, we abstract away the sophisticated cascade of plasticity expression. Second, the plasticity regions, crossed by the trajectories, are described with a minimal set of parameters and their tuning is quite straightforward and done once and for all even when the joint activity is stochastic. The tuning of the model is possible thanks to the decoupling of the plasticity process from the spine biophysics which acts as a feed-forward input to the plasticity Markov chain and from the distributions of the different trajectories which are well separated. It is expected that one can find other model versions (parameters or conceptual) instantiating our concept that also match the data well.

In our model, some CaMKII-CaN trajectories overshoot the plasticity regions. Although abnormally high and prolonged calcium influx to cells can trigger cell death (Zhitovitsky and Orrenius, 2011), the effects of high calcium concentrations at single synapses are poorly understood. Notably, a few studies have reported evidence consistent with an overshoot, where strong synaptic calcium influx does not induce LTP (Yang et al., 1999; Tigaret et al., 2016; Pousinha et al., 2017).

How can the synapse reliably express plasticity but be noisy at the same time (Yuste et al., 1999; Ribrault et al., 2011)? Noise can be reduced either by redundancy or by averaging across time, also called ergodicity (Sterling and Laughlin, 2015). However redundancy requires manufacturing and maintaining more components, and therefore costs energy. We propose that, instead, plasticity induction is robust due to temporal averaging by slow-timescale signalling and adaptation processes. These slow variables reduce noise by averaging the faster timescale stochastic variables. This may be a reason why CaMKII uses auto-phosphorylation to sustain its activity and slow its decay time (Chang et al., 2017, 2019). In summary, this suggests that the temporal averaging by slow variables, combined with the separability afforded by the multidimensional readout, allows synapses to tolerate noise while remaining energy-efficient.

We identified some limitations of the model. First, we modelled only a single postsynaptic spine attached to two-compartment neuron for soma and dendrite. Second, the model abstracted the complicated process of synaptic plasticity expression, and even if this replicated the "early" phase of LTP/LTD expression in the first 30-60 mins after induction, slower protein-synthesis-dependent processes, maintenance processes, and synaptic pruning proceed at later timescales (Bailey et al., 2015). Third, like most biophysical models, ours contained many parameters (Methods). Although we set these to physiologically plausible values and then

tuned to match the plasticity data, other combinations of parameters may fit the data equally well (Marder and Taylor, 2011; Mäki-Marttunen et al., 2020) due to the ubiquitous phenomenon of redundancy in biochemical and neural systems (Gutenkunst et al., 2007; Marder, 2011). Indeed synapses are quite heterogeneous in receptor and ion channel counts (Takumi et al., 1999; Sabatini and Svoboda, 2000; Racca et al., 2000; Nimchinsky et al., 2004), protein abundances (Shepherd and Harris, 1998; Sugiyama et al., 2005), and spine morphologies (Harris and Stevens, 1989; Bartol et al., 2015), even within the subpopulation of CA1 pyramidal neuron synapses that we modelled here. It remains to be discovered how neurons tune their synaptic properties in this vast parameter space to achieve functional plasticity rules, or implement meta-plasticity (Huang et al., 1992; Deisseroth et al., 1995; Abraham, 2008).

Several predictions follow from our results. Since the model respected the stochasticity of vesicle release (Rizzoli and Betz, 2005; Alabi and Tsien, 2012), NMDAr (Nimchinsky et al., 2004; Popescu et al., 2004; Iacobucci and Popescu, 2017; Sinclair et al., 2016), and VGCC opening (Magee and Johnston, 1995; Sabatini and Svoboda, 2000; Iftinca et al., 2006), the magnitude of plasticity varied from simulation trial to trial (Figures 3G,4E). This suggests that the rules of plasticity are inherently stochastic (Bhalla, 2004; Antunes et al., 2016) and that the variability observed in experiments (Inglebert et al., 2020; Tigaret et al., 2016; Dudek and Bear, 1992, 1993; Mizuno et al., 2001; Meredith et al., 2003; Wittenberg and Wang, 2006) is not just due to heterogeneity in synapse properties. By running extensive simulations over the space of protocols beyond those tested experimentally (Figures 3H,I; 4F; 5C,E,F; 6E,F), we made testable predictions for plasticity outcomes. For example, Tigaret et al. (2016) did not find LTD when using classic post-before-pre stimulation protocols, but the model predicted that LTD could be induced if the number of pairing repetitions was extended (Figure 3H,I). The model also predicts that the lack of LTD induced by FDP in adults can be recovered using doublets or quadruplet spike protocols (Figure 5D). We tested the model's sensitivity to spike time jitter and spike failure in the stimulation protocols (Figure 7). Our simulations predict that this firing variability can alter the rules of plasticity, in the sense that it is possible to add noise to cause LTP for protocols that did not otherwise induce plasticity.

What do these results imply about the rules of plasticity *in vivo*? First, we noticed that successful LTP or LTD induction required a balance between two types of slow variables: those that attenuate, such as presynaptic vesicle pools and dendritic BaP, versus those that accumulate, such as slow enzymatic integration (Cai et al., 2007; Mizusaki et al., 2018; Deperrois and Graupner, 2020). This balance is reflected in the inverted-U shaped

magnitude of LTP seen as a function of post-synaptic firing rate (Figure 7H). Second, although spike timing on millisecond timescales can in certain circumstances affect the direction and magnitude of plasticity (Figure 3), in order to drive sufficient activity of synaptic enzymes, these patterns would need to be repeated for several seconds. However, if these repetitions are subject to jitter or failures, as observed in hippocampal spike trains *in vivo* (Fenton and Muller, 1998; Wierzynski et al., 2009), then the millisecond-timescale information will be destroyed as it gets averaged out across repetitions by the slow integration processes of CaMKII and CaN (Figure 7A-D). The net implication is that millisecond-timescale structure of individual spike pairs is unlikely to play an important role in determining hippocampal synaptic plasticity *in vivo* (Froemke and Dan, 2002; Sadowski et al., 2016; Graupner et al., 2016).

In summary, we presented a new type of biophysical model for plasticity induction at the rat CA3-CA1 glutamatergic synapse. Although the model itself is specific to this synapse type, the study's insights may generalise to other synapse types, enabling a deeper understanding of the rules of synaptic plasticity and brain learning.

## Methods

Detailed methods are provided in the online version of this paper and include the following:

- Resource availability
  - Lead Contact
  - Data and code availability
  - Notations
- Modelling procedures
  - Vesicle release and recycling
  - Membrane potential and currents
  - Action-potential backpropagation (BaP)
    - Postsynaptic currents
    - Age-dependent BaP adaptation
    - AP evoked by EPSP
  - AMPA
    - Markov chain
  - Postsynaptic Ca<sup>2+</sup> influx
  - NMDAr - GluN2A and GluN2B
    - Markov chain
    - NMDAr and age switch
    - NMDAr and temperature
    - NMDAr current and Ca<sup>2+</sup>-dependent conductance
  - GABA(A) receptor
    - Markov chain
    - GABA(A)r and temperature
    - GABA(A)r and age switch
  - VGCC - T, R and L type
    - Markov chain
    - VGCC and temperature

VGCC currents  
SK channel  
Enzymes - CaM, CaN and CaMKII  
Markov chain  
Temperature change on enzymatic-activity  
Readout

## Data and Software Availability

The code will be available on Github after peer-review process.

## Supplemental Information description

Supplemental information can be found in the online version of this paper and include the following content:

- Varying experimental parameters in (Tigaret et al., 2016).
- Varying experimental parameters in (Dudek and Bear, 1992) and Poisson spike train during development.
- Duplets, triplets and quadruplets for FDP, perturbing developmental-mechanisms for LFS and HFS in (Dudek and Bear, 1993), and age-related changes in STDP experiments (Inglebert et al., 2020; Tigaret et al., 2016; Meredith et al., 2003).
- Varying experimental parameters in (Inglebert et al., 2020), other (Inglebert et al., 2020)'s data and model comparison, and Mizuno et al. (2001)'s data.
- Effects of temperature and  $[Ca^{2+}]_o$  on the CaN-CaMKII initial conditions, Wittenberg and Wang (2006)'s data, literature comparison on the physiologically relevant temperature.

## Acknowledgments

This work has been partially supported by the French government, through the UCAJEDI Investments in the Future project managed by the National Research Agency (ANR-15-IDEX-01), see [ComputaBrain project](#). Funding was also provided by the UK Medical Research Council (MR/S026630/1) and from the European Union's Horizon 2020 Framework Programme for Research and Innovation under the Specific Grant Agreement No. 945539 (Human Brain Project SGA3). We thank Kim A. Blackwell, Serena M. Dudek, Matthew G. Gold, Jack R. Mellor, L. Mironov, Matthew C. Pharris, Gabriela K. Popescu and Gayle M. Wittenberg for advice and discussions.

## Author Contributions

Conceptualization Y.E.R., C.O. and R.V ; Performed simulations Y.E.R; Designed the figures Y.E.R.; Original draft Y.E.R. and C.O.; Mathematical formalization Y.E.R. and R.V.; Writing, Review Editing Y.R., C.O., R.V. and

H.M. ; Coding Y.E.R., C.O. and R.V.; Software R.V. ; Supervision R.V., C.O. and H.M. ; Funding H.M., C.O. ; Biological consulting C.O. and H.M. Investigation Y.E.R. and C.O. ; Project Management R.V. and H.M. .

## Declaration of Interests

The authors declare no competing interests.

## References

- Abarbanel, H.D., Gibb, L., Huerta, R., Rabinovich, M.I., 2003. Biophysical model of synaptic plasticity dynamics. *Biological cybernetics* 89, 214–226.
- Abraham, W.C., 2008. Metaplasticity: tuning synapses and networks for plasticity. *Nature Reviews Neuroscience* 9, 387–387.
- Abraham, W.C., Mason-Parker, S.E., Bear, M.F., Webb, S., Tate, W.P., 2001. Heterosynaptic metaplasticity in the hippocampus in vivo: a bcm-like modifiable threshold for ltp. *Proceedings of the National Academy of Sciences* 98, 10924–10929.
- Adelman, J.P., Maylie, J., Sah, P., 2012. Small-conductance  $Ca^{2+}$ -activated  $K^{+}$  channels: form and function. *Annual review of physiology* 74, 245–269.
- Adrian, M., Kusters, R., Storm, C., Hoogenraad, C.C., Kapitein, L.C., 2017. Probing the interplay between dendritic spine morphology and membrane-bound diffusion. *Biophysical journal* 113, 2261–2270.
- Alabi, A.A., Tsien, R.W., 2012. Synaptic vesicle pools and dynamics. *Cold Spring Harbor perspectives in biology* 4, a013680.
- Antunes, G., De Schutter, E., 2012. A stochastic signaling network mediates the probabilistic induction of cerebellar long-term depression. *Journal of Neuroscience* 32, 9288–9300.
- Antunes, G., Roque, A., Simoes-de Souza, F., 2016. Stochastic induction of long-term potentiation and long-term depression. *Scientific reports* 6, 30899.
- Artola, A., Bröcher, S., Singer, W., 1990. Different voltage-dependent thresholds for inducing long-term depression and long-term potentiation in slices of rat visual cortex. *Nature* 347, 69–72.
- Badoual, M., Zou, Q., Davison, A.P., Rudolph, M., Bal, T., Frégnac, Y., Destexhe, A., 2006. Biophysical and phenomenological models of multiple spike interactions in spike-timing dependent plasticity. *International journal of neural systems* 16, 79–97.

- Bailey, C.H., Kandel, E.R., Harris, K.M., 2015. Structural components of synaptic plasticity and memory consolidation. *Cold Spring Harbor perspectives in biology* 7, a021758.
- Bartol, T.M., Keller, D.X., Kinney, J.P., Bajaj, C.L., Harris, K.M., Sejnowski, T.J., Kennedy, M.B., 2015. Computational reconstitution of spine calcium transients from individual proteins. *Frontiers in synaptic neuroscience* 7, 17.
- Bhalla, U.S., 2004. Signaling in small subcellular volumes. ii. stochastic and diffusion effects on synaptic network properties. *Biophysical Journal* 87, 745–753.
- Bi, G.q., Poo, M.m., 1998. Synaptic modifications in cultured hippocampal neurons: dependence on spike timing, synaptic strength, and postsynaptic cell type. *Journal of neuroscience* 18, 10464–10472.
- Bienenstock, E.L., Cooper, L.N., Munro, P.W., 1982. Theory for the development of neuron selectivity: orientation specificity and binocular interaction in visual cortex. *Journal of Neuroscience* 2, 32–48.
- Bittner, K.C., Milstein, A.D., Grienberger, C., Romani, S., Magee, J.C., 2017. Behavioral time scale synaptic plasticity underlies ca1 place fields. *Science* 357, 1033–1036.
- Blackwell, K.T., Salinas, A.G., Tewatia, P., English, B., Hellgren Kotaleski, J., Lovinger, D.M., 2019. Molecular mechanisms underlying striatal synaptic plasticity: relevance to chronic alcohol consumption and seeking. *European Journal of Neuroscience* 49, 768–783.
- Blum, K.I., Abbott, L.F., 1996. A model of spatial map formation in the hippocampus of the rat. *Neural computation* 8, 85–93.
- Bock, T., Honnuraiah, S., Stuart, G.J., 2019. Paradoxical excitatory impact of sk channels on dendritic excitability. *Journal of Neuroscience* 39, 7826–7839.
- Borst, J.G.G., 2010. The low synaptic release probability in vivo. *Trends in neurosciences* 33, 259–266.
- Buchanan, K.A., Mellor, J.R., 2007. The development of synaptic plasticity induction rules and the requirement for postsynaptic spikes in rat hippocampal ca1 pyramidal neurones. *The Journal of Physiology* 585, 429–445.
- Busch, C., Sakmann, B., 1990. Synaptic transmission in hippocampal neurons: numerical reconstruction of quantal ipscs, in: *Cold Spring Harbor symposia on quantitative biology*, Cold Spring Harbor Laboratory Press. pp. 69–80.
- Cai, Y., Gavornik, J.P., Cooper, L.N., Yeung, L.C., Shouval, H.Z., 2007. Effect of stochastic synaptic and dendritic dynamics on synaptic plasticity in visual cortex and hippocampus. *Journal of neurophysiology* 97, 375–386.
- Cao, G., Harris, K.M., 2012. Developmental regulation of the late phase of long-term potentiation (l-ltp) and metaplasticity in hippocampal area ca1 of the rat. *Journal of neurophysiology* 107, 902–912.
- Chamma, I., Chevy, Q., Poncer, J.C., Lévi, S., 2012. Role of the neuronal k-cl co-transporter kcc2 in inhibitory and excitatory neurotransmission. *Frontiers in cellular neuroscience* 6, 5.
- Chang, J.Y., Nakahata, Y., Hayano, Y., Yasuda, R., 2019. Mechanisms of ca<sup>2+</sup>/calmodulin-dependent kinase ii activation in single dendritic spines. *Nature Communications* 10, 2784.
- Chang, J.Y., Parra-Bueno, P., Laviv, T., Szatmari, E.M., Lee, S.J.R., Yasuda, R., 2017. Camkii autophosphorylation is necessary for optimal integration of ca<sup>2+</sup> signals during ltp induction, but not maintenance. *Neuron* 94, 800–808.
- Cizeron, M., Qiu, Z., Koniaris, B., Gokhale, R., Komiyama, N.H., Fransén, E., Grant, S.G., 2020. A brain-wide atlas of synapses across the mouse lifespan. *Science* .
- Clopath, C., Gerstner, W., 2010. Voltage and spike timing interact in stdp—a unified model. *Frontiers in synaptic neuroscience* 2, 25.
- Colbert, C.M., Magee, J.C., Hoffman, D.A., Johnston, D., 1997. Slow recovery from inactivation of na<sup>+</sup> channels underlies the activity-dependent attenuation of dendritic action potentials in hippocampal ca1 pyramidal neurons. *Journal of Neuroscience* 17, 6512–6521.
- Coombs, I.D., MacLean, D.M., Jayaraman, V., Farrant, M., Cull-Candy, S.G., 2017. Dual effects of tarp  $\gamma$ -2 on glutamate efficacy can account for ampa receptor autoinactivation. *Cell reports* 20, 1123–1135.
- Cui, Y., Prokin, I., Mendes, A., Berry, H., Venance, L., 2018. Robustness of stdp to spike timing jitter. *Scientific reports* 8, 1–15.
- De Pittà, M., Brunel, N., 2016. Modulation of synaptic plasticity by glutamatergic gliotransmission: A modeling study. *Neural plasticity* .
- Debanne, D., Guerineau, N.C., Gähwiler, B., Thompson, S.M., 1996. Paired-pulse facilitation and depression at unitary synapses in rat hippocampus: quantal fluctuation affects subsequent release. *The Journal of physiology* 491, 163–176.



- Deisseroth, K., Bito, H., Schulman, H., Tsien, R., 1995. Synaptic plasticity: a molecular mechanism for metaplasticity. *Current Biology* 5, 1334–1338.
- Deperrois, N., Graupner, M., 2020. Short-term depression and long-term plasticity together tune sensitive range of synaptic plasticity. *PLoS computational biology* 16, e1008265.
- Destexhe, A., Mainen, Z.F., Sejnowski, T.J., 1994. Synthesis of models for excitable membranes, synaptic transmission and neuromodulation using a common kinetic formalism. *Journal of computational neuroscience* 1, 195–230.
- Destexhe, A., Mainen, Z.F., Sejnowski, T.J., 1998. Kinetic models of synaptic transmission. *Methods in neuronal modeling* 2, 1–25.
- Dobrunz, L.E., Huang, E.P., Stevens, C.F., 1997. Very short-term plasticity in hippocampal synapses. *Proceedings of the National Academy of Sciences* 94, 14843–14847.
- Dudek, S., Bear, M., 1992. Homosynaptic long-term depression in area ca1 of hippocampus and effects of n-methyl-d-aspartate receptor blockade. *Proceedings of the National Academy of Sciences of the United States of America* 89, 4363.
- Dudek, S.M., Bear, M.F., 1993. Bidirectional long-term modification of synaptic effectiveness in the adult and immature hippocampus. *Journal of Neuroscience* 13, 2910–2918.
- Ebner, C., Clopath, C., Jedlicka, P., Cuntz, H., 2019. Unifying long-term plasticity rules for excitatory synapses by modeling dendrites of cortical pyramidal neurons. *Cell Reports* 29, 4295–4307.
- Edwards, F.A., Konnerth, A., Sakmann, B., 1990. Quantal analysis of inhibitory synaptic transmission in the dentate gyrus of rat hippocampal slices: a patch-clamp study. *The Journal of Physiology* 430, 213–249.
- Enoki, R., Hu, Y.I., Hamilton, D., Fine, A., 2009. Expression of long-term plasticity at individual synapses in hippocampus is graded, bidirectional, and mainly presynaptic: optical quantal analysis. *Neuron* 62, 242–253.
- Etherington, S.J., Atkinson, S.E., Stuart, G.J., Williams, S.R., 2010. Synaptic integration. *eLS*.
- Eurich, C.W., Pawelzik, K., Ernst, U., Cowan, J.D., Milton, J.G., 1999. Dynamics of self-organized delay adaptation. *Physical Review Letters* 82, 1594.
- Feng, B., Raghavachari, S., Lisman, J., 2011. Quantitative estimates of the cytoplasmic, psd, and nmdar-bound pools of camkii in dendritic spines. *Brain research* 1419, 46–52.
- Fenton, A.A., Muller, R.U., 1998. Place cell discharge is extremely variable during individual passes of the rat through the firing field. *Proceedings of the National Academy of Sciences* 95, 3182–3187.
- Fernandez, F.R., White, J.A., 2010. Gain control in ca1 pyramidal cells using changes in somatic conductance. *Journal of Neuroscience* 30, 230–241.
- Fernández-Alfonso, T., Ryan, T.A., 2004. The kinetics of synaptic vesicle pool depletion at cns synaptic terminals. *Neuron* 41, 943–953.
- Forsythe, I.D., Tsujimoto, T., Barnes-Davies, M., Cuttle, M.F., Takahashi, T., 1998. Inactivation of presynaptic calcium current contributes to synaptic depression at a fast central synapse. *Neuron* 20, 797–807.
- Fricker, D., Miles, R., 2000. Epsp amplification and the precision of spike timing in hippocampal neurons. *Neuron* 28, 559–569.
- Froemke, R.C., Dan, Y., 2002. Spike-timing-dependent synaptic modification induced by natural spike trains. *Nature* 416, 433.
- Fujii, H., Inoue, M., Okuno, H., Sano, Y., Takemoto-Kimura, S., Kitamura, K., Kano, M., Bito, H., 2013. Nonlinear decoding and asymmetric representation of neuronal input information by camkii $\alpha$  and calcineurin. *Cell reports* 3, 978–987.
- Gerstner, W., Kempter, R., Van Hemmen, J.L., Wagner, H., 1996. A neuronal learning rule for sub-millisecond temporal coding. *Nature* 383, 76–78.
- Giese, K.P., Fedorov, N.B., Filipkowski, R.K., Silva, A.J., 1998. Autophosphorylation at thr286 of the  $\alpha$  calcium-calmodulin kinase ii in ltp and learning. *Science* 279, 870–873.
- Golding, N.L., Kath, W.L., Spruston, N., 2001. Dichotomy of action-potential backpropagation in ca1 pyramidal neuron dendrites. *Journal of neurophysiology* 86, 2998–3010.
- Golding, N.L., Staff, N.P., Spruston, N., 2002. Dendritic spikes as a mechanism for cooperative long-term potentiation. *Nature* 418, 326–331.
- Graupner, M., Brunel, N., 2012. Calcium-based plasticity model explains sensitivity of synaptic changes to spike pattern, rate, and dendritic location. *Proceedings of the National Academy of Sciences* 109, 3991–3996.
- Graupner, M., Wallisch, P., Ostojic, S., 2016. Natural firing patterns imply low sensitivity of synaptic plasticity to spike timing compared with firing rate. *Journal of Neuroscience* 36, 11238–11258.

- Grewe, B.F., Bonnan, A., Frick, A., 2010. Back-propagation of physiological action potential output in dendrites of slender-tufted l5a pyramidal neurons. *Frontiers in cellular neuroscience* 4, 13.
- Griffith, T., Tsaneva-Atanasova, K., Mellor, J.R., 2016. Control of ca<sup>2+</sup> influx and calmodulin activation by sk-channels in dendritic spines. *PLoS computational biology* 12.
- Gutenkunst, R.N., Waterfall, J.J., Casey, F.P., Brown, K.S., Myers, C.R., Sethna, J.P., 2007. Universally sloppy parameter sensitivities in systems biology models. *PLoS Comput Biol* 3, e189.
- Gymnopoulos, M., Cingolani, L.A., Pedarzani, P., Stocker, M., 2014. Developmental mapping of small-conductance calcium-activated potassium channel expression in the rat nervous system. *Journal of Comparative Neurology* 522, 1072–1101.
- Hardie, J., Spruston, N., 2009. Synaptic depolarization is more effective than back-propagating action potentials during induction of associative long-term potentiation in hippocampal pyramidal neurons. *Journal of Neuroscience* 29, 3233–3241.
- Hardingham, N.R., Bannister, N.J., Read, J.C., Fox, K.D., Hardingham, G.E., Jack, J.J.B., 2006. Extracellular calcium regulates postsynaptic efficacy through group 1 metabotropic glutamate receptors. *Journal of Neuroscience* 26, 6337–6345.
- Harris, K.M., Jensen, F.E., Tsao, B., 1992. Three-dimensional structure of dendritic spines and synapses in rat hippocampus (ca1) at postnatal day 15 and adult ages: implications for the maturation of synaptic physiology and long-term potentiation [published erratum appears in *J Neurosci* 1992 aug; 12 (8): following table of contents]. *Journal of Neuroscience* 12, 2685–2705.
- Harris, K.M., Stevens, J.K., 1989. Dendritic spines of ca 1 pyramidal cells in the rat hippocampus: serial electron microscopy with reference to their biophysical characteristics. *Journal of Neuroscience* 9, 2982–2997.
- He, Y., Kulasiri, D., Samarasinghe, S., 2015. Modelling the dynamics of camkii-nmdar complex related to memory formation in synapses: The possible roles of threonine 286 autophosphorylation of camkii in long term potentiation. *Journal of theoretical biology* 365, 403–419.
- Hebb, D.O., 1949. *The organization of behavior: a neuropsychological theory*.
- Heil, K.F., Wysocka, E., Sorokina, O., Kotaleski, J.H., Simpson, T.I., Armstrong, J.D., Sterratt, D.C., 2018. Analysis of proteins in computational models of synaptic plasticity. *BioRxiv*, 254094.
- van Herck, I., Bentzen, B.H., Seutin, V., Arevalo, H., Maleckar, M.M., Marrion, N.V., Edwards, A.G., 2018. Model development of sk channel gating incorporating calcium sensitivity and drug interaction. *Biophysical Journal* 114, 306a.
- Higley, M.J., Sabatini, B.L., 2012. Calcium signaling in dendritic spines. *Cold Spring Harbor perspectives in biology* 4, a005686.
- Hille, B., 1978. Ionic channels in excitable membranes. current problems and biophysical approaches. *Biophysical Journal* 22, 283–294.
- Hines, M.L., Carnevale, N.T., 1997. The neuron simulation environment. *Neural computation* 9, 1179–1209.
- Holcman, D., Korkotian, E., Segal, M., 2005. Calcium dynamics in dendritic spines, modeling and experiments. *Cell calcium* 37, 467–475.
- Huang, Y.Y., Colino, A., Selig, D.K., Malenka, R.C., 1992. The influence of prior synaptic activity on the induction of long-term potentiation. *Science* 255, 730–733.
- Iacobucci, G.J., Popescu, G.K., 2017. Nmda receptors: linking physiological output to biophysical operation. *Nature reviews Neuroscience* 18, 236.
- Iacobucci, G.J., Popescu, G.K., 2018. Kinetic models for activation and modulation of nmda receptor subtypes. *Current Opinion in Physiology*.
- Iftinca, M., McKay, B., Snutch, T., McRory, J., Turner, R., Zamponi, G., 2006. Temperature dependence of t-type calcium channel gating. *Neuroscience* 142, 1031–1042.
- Inglebert, Y., Aljadeff, J., Brunel, N., Debanne, D., 2020. Synaptic plasticity rules with physiological calcium levels. *Proceedings of the National Academy of Sciences* doi:10.1073/pnas.2013663117.
- Isaac, J.T., Buchanan, K.A., Muller, R.U., Mellor, J.R., 2009. Hippocampal place cell firing patterns can induce long-term synaptic plasticity in vitro. *Journal of Neuroscience* 29, 6840–6850.
- Jahr, C.E., Stevens, C.F., 1990. A quantitative description of nmda receptor-channel kinetic behavior. *Journal of Neuroscience* 10, 1830–1837.
- Jung, H.Y., Mickus, T., Spruston, N., 1997. Prolonged sodium channel inactivation contributes to dendritic action potential attenuation in hippocampal pyramidal neurons. *Journal of Neuroscience* 17, 6639–6646.
- Kakiuchi, S., YASUDA, S., YAMAZAKI, R., TESHIMA, Y., KANDA, K., KAKIUCHI, R., SOBUE, K., 1982. Quantitative determinations of calmodulin in the supernatant and particulate fractions of mammalian tissues. *The Journal of Biochemistry* 92, 1041–1048.

- Karmarkar, U.R., Buonomano, D.V., 2002. A model of spike-timing dependent plasticity: one or two coincidence detectors? *Journal of neurophysiology* 88, 507–513.
- Kealy, J., Commins, S., 2010. Frequency-dependent changes in synaptic plasticity and brain-derived neurotrophic factor (bDNF) expression in the ca1 to perirhinal cortex projection. *Brain research* 1326, 51–61.
- King, R.D., Wiest, M.C., Montague, P.R., 2001. Extracellular calcium depletion as a mechanism of short-term synaptic depression. *Journal of Neurophysiology* 85, 1952–1959.
- Klyachko, V.A., Stevens, C.F., 2006. Temperature-dependent shift of balance among the components of short-term plasticity in hippocampal synapses. *Journal of Neuroscience* 26, 6945–6957.
- Koch, C., Zador, A., 1993. The function of dendritic spines: devices subserving biochemical rather than electrical compartmentalization. *Journal of Neuroscience* 13, 413–422.
- Korinek, M., Sedlacek, M., Cais, O., Dittert, I., Vyklícký Jr, L., 2010. Temperature dependence of n-methyl-D-aspartate receptor channels and n-methyl-D-aspartate receptor excitatory postsynaptic currents. *Neuroscience* 165, 736–748.
- Kumar, A., Mehta, M.R., 2011. Frequency-dependent changes in nmdar-dependent synaptic plasticity. *Frontiers in computational neuroscience* 5, 38.
- Kwon, T., Sakamoto, M., Peterka, D.S., Yuste, R., 2017. Attenuation of synaptic potentials in dendritic spines. *Cell reports* 20, 1100–1110.
- Lee, S.J.R., Escobedo-Lozoya, Y., Szatmari, E.M., Yasuda, R., 2009. Activation of camkii in single dendritic spines during long-term potentiation. *Nature* 458, 299–304.
- Levine, D., Woody, C., 1978. Effects of active versus passive dendritic membranes on the transfer properties of a simulated neuron. *Biological cybernetics* 31, 63–70.
- Li, H., Pink, M.D., Murphy, J.G., Stein, A., Dell'Acqua, M.L., Hogan, P.G., 2012. Balanced interactions of calcineurin with akap79 regulate ca<sup>2+</sup>-calcineurin-*nfat* signaling. *Nature structural & molecular biology* 19, 337.
- Lisman, J., 1989. A mechanism for the hebb and the anti-hebb processes underlying learning and memory. *Proceedings of the National Academy of Sciences* 86, 9574–9578.
- Liu, G., Choi, S., Tsien, R.W., 1999. Variability of neurotransmitter concentration and nonsaturation of post-synaptic ampa receptors at synapses in hippocampal cultures and slices. *Neuron* 22, 395–409.
- Macdonald, R.L., Rogers, C.J., Twyman, R., 1989. Kinetic properties of the gabaa receptor main conductance state of mouse spinal cord neurones in culture. *The Journal of Physiology* 410, 479–499.
- Magee, J.C., Johnston, D., 1995. Characterization of single voltage-gated na<sup>+</sup> and ca<sup>2+</sup> channels in apical dendrites of rat ca1 pyramidal neurons. *The Journal of physiology* 487, 67–90.
- Magee, J.C., Johnston, D., 1997. A synaptically controlled, associative signal for hebbian plasticity in hippocampal neurons. *Science* 275, 209–213.
- Maki, B.A., Popescu, G.K., 2014. Extracellular ca<sup>2+</sup> ions reduce nmda receptor conductance and gating. *Journal of General Physiology* 144, 379–392.
- Mäki-Marttunen, T., Iannella, N., Edwards, A.G., Einevoll, G., Blackwell, K.T., 2020. A unified computational model for cortical post-synaptic plasticity. *eLife*.
- Maravall, á., Mainen, Z., Sabatini, B., Svoboda, K., 2000. Estimating intracellular calcium concentrations and buffering without wavelength ratioing. *Biophysical journal* 78, 2655–2667.
- Marder, E., 2011. Variability, compensation, and modulation in neurons and circuits. *Proceedings of the National Academy of Sciences* 108, 15542–15548.
- Marder, E., Taylor, A.L., 2011. Multiple models to capture the variability in biological neurons and networks. *Nature neuroscience* 14, 133–138.
- Markram, H., Gerstner, W., Sjöström, P.J., 2011. A history of spike-timing-dependent plasticity. *Frontiers in synaptic neuroscience* 3, 4.
- Maylie, J., Bond, C.T., Herson, P.S., Lee, W.S., Adelman, J.P., 2004. Small conductance ca<sup>2+</sup>-activated k<sup>+</sup> channels and calmodulin. *The Journal of physiology* 554, 255–261.
- Mayr, C.G., Partzsch, J., 2010. Rate and pulse based plasticity governed by local synaptic state variables. *Frontiers in Synaptic Neuroscience* 2, 33.
- McCauley, J.P., Petroccione, M.A., D'Brant, L.Y., Todd, G.C., Affinnih, N., Wisnoski, J.J., Zahid, S., Shree, S., Sousa, A.A., De Guzman, R.M., et al., 2020. Circadian modulation of neurons and astrocytes controls synaptic plasticity in hippocampal area ca1. *Cell reports* 33, 108255.

- Mendoza, A.L., Durán, D.A.B., Gómez, A.B.S., 2018. Increased dendritic length in ca1 and ca3 hippocampal neurons during the metestrus phase in wistar rats. *Brain research* 1682, 78–83.
- Meredith, R.M., Floyer-Lea, A.M., Paulsen, O., 2003. Maturation of long-term potentiation induction rules in rodent hippocampus: role of gabaergic inhibition. *Journal of Neuroscience* 23, 11142–11146.
- Michalski, P., 2013. The delicate bistability of camkii. *Biophysical journal* 105, 794–806.
- Migliore, M., Hoffman, D.A., Magee, J.C., Johnston, D., 1999. Role of an a-type k<sup>+</sup> conductance in the back-propagation of action potentials in the dendrites of hippocampal pyramidal neurons. *Journal of computational neuroscience* 7, 5–15.
- Mizuno, T., Kanazawa, I., Sakurai, M., 2001. Differential induction of ltp and ltd is not determined solely by instantaneous calcium concentration: an essential involvement of a temporal factor. *European Journal of Neuroscience* 14, 701–708.
- Mizusaki, B.E., Li, S.S., Costa, R.P., Sjöström, P.J., 2018. Pre- and postsynaptically expressed spiking-timing-dependent plasticity contribute differentially to neuronal learning. *BioRxiv* , 450825.
- Mulkey, R.M., Malenka, R.C., 1992. Mechanisms underlying induction of homosynaptic long-term depression in area ca1 of the hippocampus. *Neuron* 9, 967–975.
- Nevian, T., Sakmann, B., 2006. Spine ca<sup>2+</sup> signaling in spike-timing-dependent plasticity. *Journal of Neuroscience* 26, 11001–11013.
- Ngo-Anh, T.J., Bloodgood, B.L., Lin, M., Sabatini, B.L., Maylie, J., Adelman, J.P., 2005. Sk channels and nmda receptors form a ca<sup>2+</sup>-mediated feedback loop in dendritic spines. *Nature neuroscience* 8, 642–649.
- Nimchinsky, E.A., Yasuda, R., Oertner, T.G., Svoboda, K., 2004. The number of glutamate receptors opened by synaptic stimulation in single hippocampal spines. *Journal of Neuroscience* 24, 2054–2064.
- O'Connor, D.H., Wittenberg, G.M., Wang, S.S.H., 2005. Dissection of bidirectional synaptic plasticity into saturable unidirectional processes. *Journal of neurophysiology* 94, 1565–1573.
- O'Donnell, C., van Rossum, M.C., 2014. Systematic analysis of the contributions of stochastic voltage gated channels to neuronal noise. *Frontiers in computational neuroscience* 8, 105.
- Oliveira, R.F., Kim, M., Blackwell, K.T., 2012. Subcellular location of pka controls striatal plasticity: stochastic simulations in spiny dendrites. *PLoS Comput Biol* 8, e1002383.
- Otis, T., Mody, I., 1992. Modulation of decay kinetics and frequency of gaba<sub>A</sub> receptor-mediated spontaneous inhibitory postsynaptic currents in hippocampal neurons. *Neuroscience* 49, 13–32.
- Otmakhov, N., Regmi, S., Lisman, J.E., 2015. Fast decay of camkii fret sensor signal in spines after ltp induction is not due to its dephosphorylation. *PLoS One* 10, e0130457.
- Peloquin, J., Doering, C., Rehak, R., McRory, J., 2008. Temperature dependence of cav1.4 calcium channel gating. *Neuroscience* 151, 1066–1083.
- Pepke, S., Kinzer-Ursem, T., Mihalas, S., Kennedy, M.B., 2010. A dynamic model of interactions of ca<sup>2+</sup>, calmodulin, and catalytic subunits of ca<sup>2+</sup>/calmodulin-dependent protein kinase ii. *PLoS computational biology* 6, e1000675.
- Pfister, J.P., Gerstner, W., 2006. Triplets of spikes in a model of spike timing-dependent plasticity. *Journal of Neuroscience* 26, 9673–9682.
- Popescu, G., Robert, A., Howe, J.R., Auerbach, A., 2004. Reaction mechanism determines nmda receptor response to repetitive stimulation. *Nature* 430, 790.
- Popovic, M.A., Carnevale, N., Rozsa, B., Zecevic, D., 2015. Electrical behaviour of dendritic spines as revealed by voltage imaging. *Nature communications* 6, 1–12.
- Postlethwaite, M., Hennig, M.H., Steinert, J.R., Graham, B.P., Forsythe, I.D., 2007. Acceleration of ampa receptor kinetics underlies temperature-dependent changes in synaptic strength at the rat calyx of held. *The Journal of physiology* 579, 69–84.
- Pousinha, P.A., Mouska, X., Raymond, E.F., Gwizdek, C., Dhib, G., Poupon, G., Zaragosi, L.E., Giudici, C., Bethus, I., Pacary, E., et al., 2017. Physiological and pathophysiological control of synaptic glun2b-nmda receptors by the c-terminal domain of amyloid precursor protein. *Elife* 6, e25659.
- Pyle, J.L., Kavalali, E.T., Piedras-Rentería, E.S., Tsien, R.W., 2000. Rapid reuse of readily releasable pool vesicles at hippocampal synapses. *Neuron* 28, 221–231.
- Quintana, A.R., Wang, D., Forbes, J.E., Waxham, M.N., 2005. Kinetics of calmodulin binding to calcineurin. *Biochemical and biophysical research communications* 334, 674–680.

- Racca, C., Stephenson, F.A., Streit, P., Roberts, J.D.B., Somogyi, P., 2000. Nmda receptor content of synapses in stratum radiatum of the hippocampal ca1 area. *Journal of Neuroscience* 20, 2512–2522.
- Rackham, O., Tsaneva-Atanasova, K., Ganesh, A., Mellor, J., 2010. A ca<sup>2+</sup>-based computational model for nmda receptor-dependent synaptic plasticity at individual post-synaptic spines in the hippocampus. *Frontiers in synaptic neuroscience* 2, 31.
- Ribrault, C., Sekimoto, K., Triller, A., 2011. From the stochasticity of molecular processes to the variability of synaptic transmission. *Nature Reviews Neuroscience* 12, 375.
- Rinetti-Vargas, G., Phamluong, K., Ron, D., Bender, K.J., 2017. Periadolescent maturation of gabaergic hyperpolarization at the axon initial segment. *Cell reports* 20, 21–29.
- Rivera, C., Voipio, J., Payne, J.A., Ruusuvuori, E., Lahtinen, H., Lamsa, K., Pirvola, U., Saarma, M., Kaila, K., 1999. The k<sup>+</sup>/cl<sup>-</sup> co-transporter kcc2 renders gaba hyperpolarizing during neuronal maturation. *Nature* 397, 251–255.
- Rizzoli, S.O., Betz, W.J., 2005. Synaptic vesicle pools. *Nature Reviews Neuroscience* 6, 57–69.
- Robert, A., Howe, J.R., 2003. How ampa receptor desensitization depends on receptor occupancy. *Journal of Neuroscience* 23, 847–858.
- Roehrl, M.H., Kang, S., Aramburu, J., Wagner, G., Rao, A., Hogan, P.G., 2004. Selective inhibition of calcineurin-nfat signaling by blocking protein-protein interaction with small organic molecules. *Proceedings of the National Academy of Sciences* 101, 7554–7559.
- Rubin, J.E., Gerkin, R.C., Bi, G.Q., Chow, C.C., 2005. Calcium time course as a signal for spike-timing dependent plasticity. *Journal of neurophysiology* .
- Rudolph, S., Tsai, M.C., Von Gersdorff, H., Wadiche, J.I., 2015. The ubiquitous nature of multivesicular release. *Trends in neurosciences* 38, 428–438.
- Sabatini, B.L., Oertner, T.G., Svoboda, K., 2002. The life cycle of ca<sup>2+</sup> ions in dendritic spines. *Neuron* 33, 439–452.
- Sabatini, B.L., Svoboda, K., 2000. Analysis of calcium channels in single spines using optical fluctuation analysis. *Nature* 408, 589–593.
- Sadowski, J.H., Jones, M.W., Mellor, J.R., 2016. Sharp-wave ripples orchestrate the induction of synaptic plasticity during reactivation of place cell firing patterns in the hippocampus. *Cell reports* 14, 1916–1929.
- Sanz-Clemente, A., Nicoll, R.A., Roche, K.W., 2013. Diversity in nmda receptor composition: many regulators, many consequences. *The Neuroscientist* 19, 62–75.
- Saraf, J., Bhattacharya, P., Kalia, K., Borah, A., Sarmah, D., Kaur, H., Dave, K.R., Yavagal, D.R., 2018. A friend or foe: calcineurin across the gamut of neurological disorders. *ACS central science* 4, 805–819.
- Segal, M., Korkotian, E., 2014. Endoplasmic reticulum calcium stores in dendritic spines. *Frontiers in neuroanatomy* 8, 64.
- Sheng, M., Cummings, J., Roldan, L.A., Jan, Y.N., Jan, L.Y., 1994. Changing subunit composition of heteromeric nmda receptors during development of rat cortex. *Nature* 368, 144–147.
- Shepherd, G.M., Harris, K.M., 1998. Three-dimensional structure and composition of ca<sup>3</sup>→ca<sup>1</sup> axons in rat hippocampal slices: implications for presynaptic connectivity and compartmentalization. *Journal of Neuroscience* 18, 8300–8310.
- Short, S.M., Oikonomou, K.D., Zhou, W.L., Acker, C.D., Popovic, M.A., Zecevic, D., Antic, S.D., 2017. The stochastic nature of action potential backpropagation in apical tuft dendrites. *Journal of neurophysiology* 118, 1394–1414.
- Shouval, H.Z., Bear, M.F., Cooper, L.N., 2002. A unified model of nmda receptor-dependent bidirectional synaptic plasticity. *Proceedings of the National Academy of Sciences* 99, 10831–10836.
- Shouval, H.Z., Wang, S.S.H., Wittenberg, G.M., 2010. Spike timing dependent plasticity: a consequence of more fundamental learning rules. *Frontiers in computational neuroscience* 4, 19.
- Sinclair, D., Cesare, J., McMullen, M., Carlson, G.C., Hahn, C.G., Borgmann-Winter, K.E., 2016. Effects of sex and dtnbp1 (dysbindin) null gene mutation on the developmental glun2b-glun2a switch in the mouse cortex and hippocampus. *Journal of neurodevelopmental disorders* 8, 14.
- Sjöström, P.J., Häusser, M., 2006. A cooperative switch determines the sign of synaptic plasticity in distal dendrites of neocortical pyramidal neurons. *Neuron* 51, 227–238.
- Sjöström, P.J., Turrigiano, G.G., Nelson, S.B., 2001. Rate, timing, and cooperativity jointly determine cortical synaptic plasticity. *Neuron* 32, 1149–1164.
- Song, S., Miller, K.D., Abbott, L.F., 2000. Competitive hebbian learning through spike-timing-dependent synaptic plasticity. *Nature neuroscience* 3, 919–926.

- Spigelman, I., Tymianski, M., Wallace, C., Carlen, P., Velumian, A., 1996. Modulation of hippocampal synaptic transmission by low concentrations of cell-permeant  $Ca^{2+}$  chelators: effects of  $Ca^{2+}$  affinity, chelator structure and binding kinetics. *Neuroscience* 75, 559–572.
- Spruston, N., Jonas, P., Sakmann, B., 1995. Dendritic glutamate receptor channels in rat hippocampal  $Ca_3$  and  $Ca_1$  pyramidal neurons. *The Journal of physiology* 482, 325–352.
- Standage, D., Trappenberg, T., Blohm, G., 2014. Calcium-dependent calcium decay explains stdp in a dynamic model of hippocampal synapses. *PloS one* 9, e86248.
- Sterling, P., Laughlin, S., 2015. Principles of neural design. MIT Press.
- Sterratt, D., Graham, B., Gillies, A., Willshaw, D., 2011. Principles of computational modelling in neuroscience. Cambridge University Press.
- Stuart, G., Spruston, N., Häusser, M., 2016. Dendrites. Oxford University Press.
- Südhof, T.C., 2000. The synaptic vesicle cycle revisited. *Neuron* 28, 317–320.
- Sugiyama, Y., Kawabata, I., Sobue, K., Okabe, S., 2005. Determination of absolute protein numbers in single synapses by a gfp-based calibration technique. *Nature methods* 2, 677–684.
- Takumi, Y., Ramírez-León, V., Laake, P., Rinvik, E., Ottersen, O.P., 1999. Different modes of expression of ampa and nmda receptors in hippocampal synapses. *Nature neuroscience* 2, 618–624.
- Tigaret, C.M., Olivo, V., Sadowski, J.H., Ashby, M.C., Mellor, J.R., 2016. Coordinated activation of distinct  $Ca^{2+}$  sources and metabotropic glutamate receptors encodes hebbian synaptic plasticity. *Nature communications* 7, 10289.
- Tsodyks, M.V., Markram, H., 1997. The neural code between neocortical pyramidal neurons depends on neurotransmitter release probability. *Proceedings of the national academy of sciences* 94, 719–723.
- Volgushev, M., Kudryashov, I., Chistiakova, M., Mukovski, M., Niesmann, J., Eysel, U.T., 2004. Probability of transmitter release at neocortical synapses at different temperatures. *Journal of neurophysiology* 92, 212–220.
- Wang, H., Wagner, J.J., 1999. Priming-induced shift in synaptic plasticity in the rat hippocampus. *Journal of neurophysiology* 82, 2024–2028.
- Wang, H.X., Gerkin, R.C., Nauen, D.W., Bi, G.Q., 2005. Coactivation and timing-dependent integration of synaptic potentiation and depression. *Nature neuroscience* 8, 187–193.
- Wierzynski, C.M., Lubenov, E.V., Gu, M., Siapas, A.G., 2009. State-dependent spike-timing relationships between hippocampal and prefrontal circuits during sleep. *Neuron* 61, 587–596.
- Wittenberg, G.M., Wang, S.S.H., 2006. Malleability of spike-timing-dependent plasticity at the  $Ca_3$ – $Ca_1$  synapse. *Journal of Neuroscience* 26, 6610–6617.
- Wood, T., Osredkar, D., Puchades, M., Maes, E., Falck, M., Flatebø, T., Walløe, L., Sabir, H., Thoresen, M., 2016. Treatment temperature and insult severity influence the neuroprotective effects of therapeutic hypothermia. *Scientific reports* 6, 1–12.
- Yang, S.N., Tang, Y.G., Zucker, R.S., 1999. Selective induction of ltp and ltd by postsynaptic  $[Ca^{2+}]_i$  elevation. *Journal of neurophysiology* 81, 781–787.
- Yi, G.S., Wang, J., Deng, B., Wei, X.L., 2017. Morphology controls how hippocampal  $Ca_1$  pyramidal neuron responds to uniform electric fields: a biophysical modeling study. *Scientific Reports* 7, 1–13.
- Yuste, R., Majewska, A., Cash, S.S., Denk, W., 1999. Mechanisms of calcium influx into hippocampal spines: heterogeneity among spines, coincidence detection by nmda receptors, and optical quantal analysis. *Journal of Neuroscience* 19, 1976–1987.
- Zhivotovsky, B., Orrenius, S., 2011. Calcium and cell death mechanisms: a perspective from the cell death community. *Cell calcium* 50, 211–221.
- Zhuravleva, Z., Saifullina, V., Zenchenko, C., 1997. Morphometric analysis of hippocampal pyramidal neurons in situ and in grafts developing in the anterior eye chambers of young and aged wistar rats. *Journal of Neural Transplantation and Plasticity* 6.

## Methods

### Resource availability

#### Lead contact

Additional information regarding the methods or computational resources used in this work should be directed to Romain Veltz ([romain.veltz@inria.fr](mailto:romain.veltz@inria.fr)) and Yuri E. Rodrigues ([yuri.rodrigues@inria.fr](mailto:yuri.rodrigues@inria.fr)).

#### Data and code availability

All simulations were performed in the [Julia](#) programming language (version 1.4.2). Simulating the synapse model is equivalent to sampling a piecewise deterministic Markov process, and this relies on the Julia package [PiecewiseDeterministicMarkovProcesses.jl](#). These simulations are event-based, and no approximation is made beyond the ones required to integrate the ordinary differential equations by the method LSODA (Livermore Solver for Ordinary Differential Equations). We run the parallel simulations in the [Nef](#) cluster operated by [Inria](#).

| EXPERIMENT | PAPER                                         | REPETITIONS                                  | FREQ (Hz)                      | AGE (DAYS)            | TEMP. (°C)            | Ca (mM) | Mg (mM) |
|------------|-----------------------------------------------|----------------------------------------------|--------------------------------|-----------------------|-----------------------|---------|---------|
| STDP       | ( <a href="#">Tigaret et al., 2016</a> )      | 300                                          | 5                              | 56                    | 35                    | 2.5     | 1.3     |
| STDP       | ( <a href="#">Inglebert et al., 2020</a> )    | 100, positive delays<br>150, negative delays | 0.3                            | 14—20<br>(21 for LTP) | 30<br>(30.45 for LTP) | 1.3—3   | Ca/1.5  |
| STDP       | ( <a href="#">Meredith et al., 2003</a> )     | 20                                           | 0.2                            | 9—45                  | 24—28                 | 2       | 2       |
| STDP       | ( <a href="#">Wittenberg and Wang, 2006</a> ) | 70—100                                       | 5                              | 14—21                 | 24—30<br>(22.5-23)    | 2       | 1       |
| pre-burst  | ( <a href="#">Tigaret et al., 2016</a> )      | 300 and 900                                  | 3 and 5                        | 56                    | 35                    | 2.5     | 1.3     |
| FDP        | ( <a href="#">Dudek and Bear, 1992</a> )      | 900                                          | 1—50                           | 35                    | 35                    | 2.5     | 1.5     |
| FDP        | ( <a href="#">Dudek and Bear, 1993</a> )      | 900                                          | 1                              | 7—35                  | 35                    | 2.5     | 1.5     |
| TBS        | ( <a href="#">Dudek and Bear, 1993</a> )      | 3—4 (5) epochs                               | 4Pre at 100 Hz<br>(10x at 5Hz) | 6, 14 and 17          | 35                    | 2.5     | 1.5     |
| LFS        | ( <a href="#">Mizuno et al., 2001</a> )       | 1—600                                        | 1                              | 12—28                 | 30<br>(26.5-31)       | 2.4     | 0       |

**Table M1.** Table with the parameters extracted from the respective publications. To fit the data associated to publications displaying a parameter interval (e.g. 70 or 100) we used a value within the provided limits. Otherwise, we depict in red the value used to fit to the data. For complete data structure on these publications and the ones used for method validation see github code. We allowed the AP to be evoked by EPSPs for these protocols: [Mizuno et al. \(2001\)](#); [Dudek and Bear \(1992, 1993\)](#). Note that [Tigaret et al. \(2016\)](#) used GABA(A)r blocker modelled by turning GABA<sub>A</sub>r conductance to zero. Also, [Mizuno et al. \(2001\)](#) LTD protocol used partial NMDA blocker modelled by reducing NMDA conductance by 97 %.

## Modelling procedures

### Notations

We write  $\mathbf{1}_A$  the indicator of a set  $A$  meaning that  $\mathbf{1}_A(x) = 1$  if  $x$  belongs to  $A$  and zero otherwise.

### Vesicle release and recycling

Vesicle-filled neurotransmitters from the presynaptic terminals stimulate the postsynaptic side when successfully released. We derived a vesicle release Markov chain model based on a deterministic approach described in ([Sterratt et al., 2011](#)) on page 183. We denote by  $(t_1, \dots, t_n)$  the time arrivals of the presynaptic spikes.

Vesicles can be in two states, either belonging to the docked pool (with cardinal  $D$ ) with fast emptying, or to the reserve pool (with cardinal  $R$ ) which replenishes  $D$  ([Rizzoli and Betz, 2005](#)). The docked pool loses one vesicle each time a release ([Rudolph et al., 2015](#)) occurs with transition  $D \rightarrow D - 1$  (Figure M1C). The reserve pool replenishes the docked one with transition  $(R, D) \rightarrow (R - 1, D + 1)$ . Finally, the reserve pool is replenished with rate  $(R_0 - R)/\tau_D^{ref}$  with the transition  $(R, D) \rightarrow (R + 1, D)$ .

| TRANSITION                          | RATE                       | INITIAL CONDITION |
|-------------------------------------|----------------------------|-------------------|
| $(R, D) \rightarrow (R - 1, D + 1)$ | $(D_0 - D) \cdot R/\tau_D$ | $D(0) = D_0$      |
| $(R, D) \rightarrow (R + 1, D - 1)$ | $(R_0 - R) \cdot D/\tau_R$ | $R(0) = R_0$      |
| $(R, D) \rightarrow (R + 1, D)$     | $(R_0 - R)/\tau_R^{ref}$   |                   |

**Table M2.** Stochastic transitions used in the pool dynamics. Note that the rates depend on the pool's cardinal ([Pyle et al., 2000](#)).

In addition to the stochastic dynamics in Table M2, each spike  $t_i$  triggers a vesicle release  $D \rightarrow D - 1$  with probability  $p_{rel}$ :

$$p_{rel}(Ca_{pre}, [Ca^{2+}]_o, D) = \frac{(Ca_{pre})^s}{(Ca_{pre})^s + h([Ca^{2+}]_o)^s} \mathbf{1}_{D>0}, \quad h([Ca^{2+}]_o) = 0.654 + \frac{1.349}{1 + e^{4 \cdot ([Ca^{2+}]_o - 1.708 \text{ mM})}}$$

which is a function of presynaptic calcium  $Ca_{pre}$  and extracellular calcium concentration  $[Ca^{2+}]_o$  through the threshold  $h([Ca^{2+}]_o)$ . To decide whether a vesicle is released for a presynaptic spike  $t_i$ , we use a phenomenological model of  $Ca_{pre}$  (see Figure M1A) based on a resource-use function (Tsodyks and Markram, 1997):

$$\begin{cases} \dot{Ca}_{pre} = -\frac{Ca_{pre}}{\tau_{pre}} & Ca_{pre}(0) = 0 \\ \dot{Ca}_{jump} = \frac{1-Ca_{jump}}{\tau_{rec}} - \delta_{decay} \cdot Ca_{jump} \cdot Ca_{pre} & Ca_{jump}(0) = 1. \end{cases} \quad (1)$$

Upon arrival of the presynaptic spikes,  $t \in (t_1, \dots, t_n)$ , we update  $Ca_{pre}$  according to the deterministic jump:

$$Ca_{pre} \longrightarrow Ca_{pre} + Ca_{jump}.$$

Finally, after  $Ca_{pre}$  has been updated, a vesicle is released with probability  $p_{rel}$  (Figure M1B).

Parameters for the vesicle release model is given in Table M3. The experimental constraints to devise a release probability model are given by Hardingham et al. (2006) and Tigaret et al. (2016). Because  $[Ca^{2+}]_o$  modifies the release probability dynamics (King et al., 2001), we fixed an initial release probability of 68 % for  $[Ca^{2+}]_o = 2.5$  mM as reported by Tigaret et al. (2016) (initial value in Figure M1B and D). Additionally, Hardingham et al. (2006) report a 38% reduction in the initial release probability when changing  $[Ca^{2+}]_o$  from 2.5 mM to 1 mM. Taking these into account, the decreasing sigmoid function in the Figure M1E depicts our  $[Ca^{2+}]_o$ -dependent release probability model ( $p_{rel}$ ).

Figure M1E shows that our  $p_{rel}$  function is in good agreement with a previous analytical model (King et al., 2001) suggesting that  $p_{rel}([Ca^{2+}]_o) \propto ([Ca^{2+}]_o)^2 \text{ mM}^{-2}$ . Our model also qualitatively reproduces the vanishing of calcium dye fluorescence levels after 20 s of theta trains from Tigaret et al. (2016) (in their Supplementary Materials). We interpret their fluorescence measurements as an effect of short-term depression (see Figure M1B).

Despite our model agreeing with previous works, it is a simplified presynaptic model that does not encompass the vesicle release's highly heterogeneous nature. Vesicle release dynamics are known to be sensitivity to various experimental conditions such as temperature (Fernández-Alfonso and Ryan, 2004), the age for some brain regions (Rudolph et al., 2015) or magnesium concentration (Hardingham et al., 2006). Furthermore, since our model of vesicle dynamics is simple,  $\tau_{rec}$  in Equation (1) has two roles: to delay the  $p_{rel}$  recovery caused by  $Ca_{pre}$  inactivation (enforced by  $\delta_{ca}$  in Equation (1)) and to prevent vesicle release after HFS induced depression (King et al., 2001; Rizzoli and Betz, 2005). Later, we incorporate a higher number of experimental parameters (age, temperature,  $[Ca^{2+}]_o$ ,  $[Mg^{2+}]_o$ ) with our NMDAr model, the main postsynaptic calcium source.

| NAME                                              | VALUE                         | REFERENCE                                                                                        |
|---------------------------------------------------|-------------------------------|--------------------------------------------------------------------------------------------------|
| <b>Vesicle release model (stochastic part)</b>    |                               |                                                                                                  |
| initial number of vesicles at D                   | $D_0 = 25$                    | 5 to 20 (Rizzoli and Betz, 2005; Alabi and Tsien, 2012)                                          |
| initial number of vesicles at R                   | $R_0 = 30$                    | 17 to 20 vesicles (Alabi and Tsien, 2012)                                                        |
| time constant R → D<br>(D recycling)              | $\tau_D = 5 \text{ s}$        | 1 s (Rizzoli and Betz, 2005)                                                                     |
| time constant D → R<br>(R mixing)                 | $\tau_R = 45 \text{ s}$       | 20 s (when depleted) to 5 min (hypertonic shock)<br>(Rizzoli and Betz, 2005; Pyle et al., 2000)  |
| time constant 1 → R<br>(R recycling)              | $\tau_R^{ref} = 40 \text{ s}$ | 20 to 30 s (Rizzoli and Betz, 2005)                                                              |
| release probability half-activation curve         | $h$                           | adjusted to different $[Ca^{2+}]_o$                                                              |
| release probability sigmoid slope                 | $s = 2$                       | adjusted to different $[Ca^{2+}]_o$                                                              |
| <b>Vesicle release model (deterministic part)</b> |                               |                                                                                                  |
| $Ca_{pre}$ attenuation recovery                   | $\tau_{pre} = 20 \text{ ms}$  | 50 - 500 ms for with dye (Maravall et al., 2000)<br>therefore < 50 to 500 ms undyed (unbuffered) |
| deterministic jump attenuation recovery           | $\tau_{rec} = 20 \text{ s}$   | ~ 20 s (Rizzoli and Betz, 2005)                                                                  |
| deterministic jump attenuation fraction           | $\delta_{ca} = .0004$         | inactivation of pre calcium (Forsythe et al., 1998)                                              |

**Table M3. Parameter values used in the presynaptic model.** Our model does not implement a larger pool called "resting pool" containing ~ 180 vesicles (CA3-CA1 hippocampus) (Alabi and Tsien, 2012). **Terminology note:** In other works, the larger pool with ~180 vesicles can be found with different nomenclatures such as "reserve pool" (Südhof, 2000) or "resting pool" (Alabi and Tsien, 2012). Furthermore, the nomenclature used in our model for the reserve pool, can also be found as "recycling pool" in (Rizzoli and Betz, 2005; Alabi and Tsien, 2012).



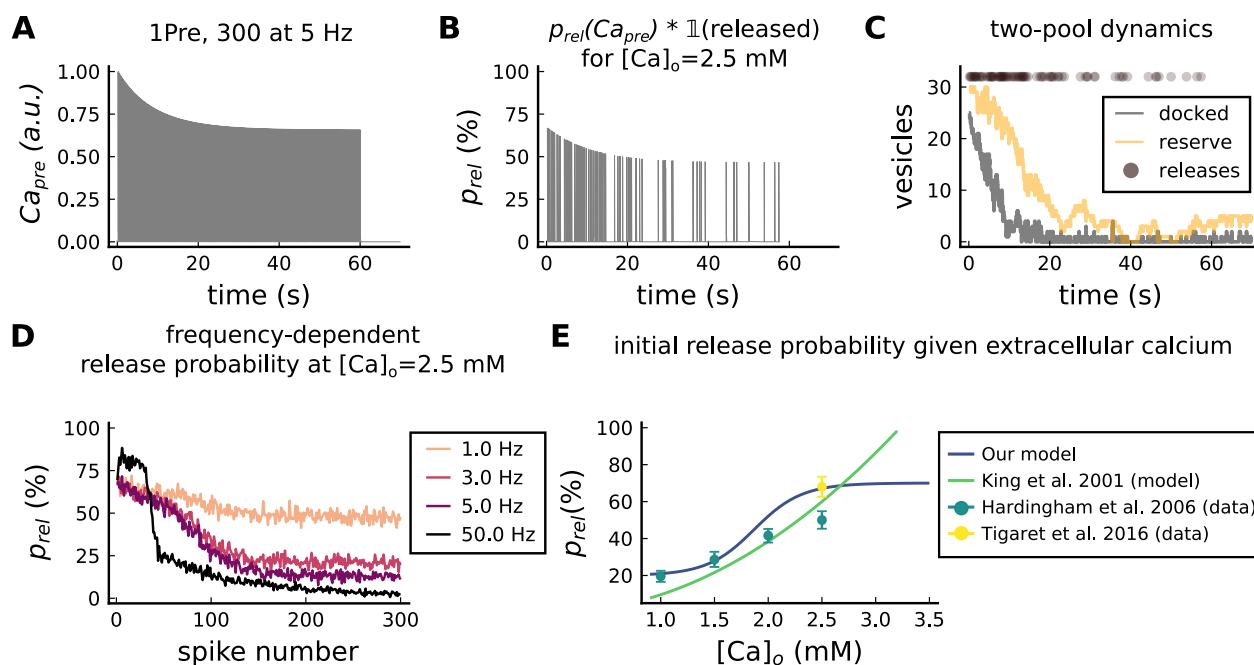

**Figure M1. Presynaptic release.** **A)** Presynaptic calcium in response to the protocol 1Pre, 300 at 5 Hz displaying adaptation. **B)** Release probability for the same protocol as panel A but subjected to the docked vesicles availability. **C)** Number of vesicles in the docked and reserve pools under depletion caused by the stimulation from panel A. **D)** Plot of the mean (300 samples) release probability (%) for different frequencies for the protocol 1Pre 300 pulses at  $[Ca^{2+}]_o = 2.5$  mM. Note that most of the frequencies are dominated by short-term depression, and the model also displays short-term facilitation (black curve, at 50 Hz). **E)** Release probability (%) for a single presynaptic spike given the  $[Ca^{2+}]_o$ . Note that King et al. (2001) model was multiplied by the experimentally measured release probability at  $[Ca^{2+}]_o = 2$  mM since their model has this calcium concentration as the baseline. Our model also does not cover the abolishing of release probability at  $[Ca^{2+}]_o = 0.5$  mM which can also be difficult to experimentally measure given the rarity of events (Hardingham et al., 2006).

| NAME                                                       | VALUE                                                      | REFERENCE                                                                                                                                             |
|------------------------------------------------------------|------------------------------------------------------------|-------------------------------------------------------------------------------------------------------------------------------------------------------|
| <b>Passive cable</b>                                       |                                                            |                                                                                                                                                       |
| leak reversal potential                                    | $E_{leak} = -70 \text{ mV}$                                | 69mV from (Spigelman et al., 1996)                                                                                                                    |
| membrane leak conductance (for spine and passive dendrite) | $g_{leak} = 4 \cdot 10^{-6} \text{ nS}/\mu\text{m}^2$      | * see table legend (Koch and Zador, 1993)                                                                                                             |
| membrane leak conductance (only soma)                      | $g_{soma} = 5.31 \cdot 10^{-3} \text{ nS}/\mu\text{m}^2$   | $3 \cdot 10^{-4}$ to $1.3 \cdot 10^{-3} \text{ nS}/\mu\text{m}^2$ (Fernandez and White, 2010)<br>47 to $2.1 \cdot 10^3 \text{ nS}$ (NeuroElectro:CA1) |
| membrane capacitance                                       | $C_m = 6 \cdot 10^{-3} \text{ pF}/\mu\text{m}^2$           | $1 \cdot 10^{-2} \text{ pF}/\mu\text{m}^2$ (Hines and Carnevale, 1997)<br>17 to 177 pF (NeuroElectro:CA1)                                             |
| axial resistivity of cytoplasm                             | $R_a = 1 \cdot 10^{-2} \text{ G}\Omega\mu\text{m}$         | $2 \cdot 10^{-3} \text{ G}\Omega\mu\text{m}$ (Golding et al., 2001)                                                                                   |
| <b>Dendrite</b>                                            |                                                            |                                                                                                                                                       |
| dendrite diameter                                          | $D_{dend} = 2 \mu\text{m}$                                 | same as (Yi et al., 2017)                                                                                                                             |
| dendrite length                                            | $L_{dend} = 1400 \mu\text{m}$                              | apical dendrites, 1200 to 1600 $\mu\text{m}$ (Mendoza et al., 2018)                                                                                   |
| dendrite surface area                                      | $A_{dend} = 8.79 \cdot 10^3 \mu\text{m}^2$                 | $\pi \cdot D_{dend} \cdot L_{dend}$                                                                                                                   |
| dendrite volume                                            | $Vol_{dend} = 4.4 \cdot 10^3 \mu\text{m}^3$                | $\pi \cdot (D_{dend}/2)^2 \cdot L_{dend}$                                                                                                             |
| dendritic membrane capacitance                             | $C_{dend} = 52.77 \text{ pF}$                              | $C_m \cdot A_{dend}$                                                                                                                                  |
| dendrite leak reversal potential                           | $g_{leakdend} = 3.51 \cdot 10^{-2} \text{ nS}$             | $g_{leak} \cdot A_{dend}$                                                                                                                             |
| dendrite axial conductance                                 | $g_{diff} = 50 \text{ nS}$                                 | $R_a \cdot A_{dend}$                                                                                                                                  |
| <b>Soma</b>                                                |                                                            |                                                                                                                                                       |
| soma diameter                                              | $D_{soma} = 30 \mu\text{m}$                                | 21 $\mu\text{m}$ (Stuart et al., 2016) page 3                                                                                                         |
| soma area (sphere)                                         | $A_{soma} = 2.82 \cdot 10^3 \mu\text{m}^2$                 | $(4\pi/3) \cdot (D_{soma}/2)^3$ ; $2.12 \cdot 10^3 \mu\text{m}^2$ (Zhuravleva et al., 1997)                                                           |
| soma membrane capacitance                                  | $C_{soma} = 16.96 \text{ pF}$                              | $C_m \cdot A_{soma}$                                                                                                                                  |
| soma leaking conductance                                   | $g_{leaksoma} = 15 \text{ nS}$                             | $g_{soma} \cdot A_{soma}$ (Fernandez and White, 2010)                                                                                                 |
| <b>Dendritic spine</b>                                     |                                                            |                                                                                                                                                       |
| spine head volume                                          | $Vol_{sp} = 0.03 \mu\text{m}^3$                            | same as (Bartol et al., 2015)                                                                                                                         |
| spine head surface                                         | $A_{sp} = 4.66 \cdot 10^{-1} \mu\text{m}^2$                | $4\pi \cdot (3Vol_{sp}/4\pi)^{2/3}$                                                                                                                   |
| spine membrane capacitance                                 | $C_{sp} = 2.8 \cdot 10^{-3} \text{ pF}$                    | $C_m \cdot A_{sp}$                                                                                                                                    |
| spine head leak conductance                                | $g_{leaksp} = 1.86 \cdot 10^{-6} \text{ nS}$               | $g_{leak} \cdot A_{sp}$                                                                                                                               |
| <b>Dendritic spine neck</b>                                |                                                            |                                                                                                                                                       |
| spine neck diameter                                        | $D_{neck} = 0.1 \mu\text{m}$                               | 0.05 to 0.6 $\mu\text{m}$ (Harris et al., 1992)                                                                                                       |
| neck length                                                | $L_{neck} = 0.2 \mu\text{m}$                               | $0.7 \pm 0.6 \mu\text{m}$ (Adrian et al., 2017)                                                                                                       |
| neck cross sectional area                                  | $CS_{neck} = 7.85 \cdot 10^{-3} \mu\text{m}^2$             | $\pi \cdot (D_{neck}/2)^2$                                                                                                                            |
| neck resistance                                            | $g_{neck} = 3.92 \text{ nS} \approx 255.1 \text{ M}\Omega$ | $CS_{neck}/(L_{neck} \cdot R_a)$<br>50 to 550 $\text{M}\Omega$ ( $275 \pm 27 \text{ M}\Omega$ ) (Popovic et al., 2015)                                |

**Table M4.** Parameters for the neuron electrical properties. \* The membrane leak conductance in the spine is small since the spine resistance is so high that is considered infinite ( $> 10^6 \text{ M}\Omega$ ) (Koch and Zador, 1993), therefore the current mostly leaks through the neck. Additionally, the dendrite leak conductance is equally small in order to control the distance-dependent attenuation by the axial resistance term  $g_{BaP}^{adapt}$  in Equations 3 and 4.

## Membrane potential and currents

Our model is built over three compartments, a spherical dendritic spine linked by the neck to a cylindrical dendrite connected to a spherical soma. The membrane potential of these compartments satisfy the equations below (parameters in Table M4). The different currents are described in the following sections.

$$C_{sp} \cdot \dot{V}_{sp} = g_{neck} \cdot (V_{dend} - V_{sp}) + g_L^{sp} \cdot (E_{rev} - V_{sp}) + I_T + I_L + I_R + I_{NMDA} + I_{AMPA} + I_{SK} \quad (2)$$

$$C_{dend} \cdot \dot{V}_{dend} = g_{BaP}^{adapt} \cdot (V_{soma} - V_{dend}) + g_{neck} \cdot (V_{sp} - V_{dend}) + g_L^{dend} \cdot (E_{rev} - V_{dend}) + I_{GABA} \quad (3)$$

$$C_{soma} \cdot \dot{V}_{soma} = g_{BaP}^{adapt} \cdot (V_{dend} - V_{soma}) + g_L^{soma} \cdot (E_{rev} - V_{soma}) + \beta_{age} \cdot (I_{BaP} + I_{Na}) + I_K \quad (4)$$

## Action-potential backpropagation (BaP)

### Postsynaptic currents

The postsynaptic currents are generated in the soma, backpropagated to the dendritic spine and filtered by a passive dendrite. The soma generates BaPs using a version of the Na+ and K+ channel models developed by Migliore et al. (1999). The related parameters are described in Table M5 (the voltage unit is mV).

#### Sodium channel

$$\alpha_m(V_{soma}) = 0.4 \cdot \frac{V_{soma} + 30}{1 - e^{-\frac{V_{soma} + 30}{7.2}}}$$

$$\beta_m(V_{soma}) = 0.124 \cdot \frac{V_{soma} + 30}{e^{\frac{V_{soma} + 30}{7.2}} - 1}$$

$$m_{inf}(V_{soma}) = \frac{\alpha_m(V_{soma})}{\alpha_m(V_{soma}) + \beta_m(V_{soma})}$$

$$m_\tau(V_{soma}) = \frac{1}{\alpha_m(V_{soma}) + \beta_m(V_{soma})}$$

$$\alpha_h(V_{soma}) = 0.01 \cdot \frac{V_{soma} + 45}{e^{\frac{V_{soma} + 45}{1.5}} - 1}$$

$$\beta_h(V_{soma}) = 0.03 \cdot \frac{V_{soma} + 45}{1 - e^{-\frac{V_{soma} + 45}{1.5}}}$$

$$\dot{h}(V_{soma}) = \alpha_h(V_{soma}) \cdot (1 - h) - \beta_h(V_{soma}) \cdot h$$

$$\dot{m}(V_{soma}) = \frac{m_{inf} - m}{m_\tau}$$

$$I_{Na} = \gamma_{Na} \cdot m^3 \cdot h \cdot (E_{revNa} - V_{soma}).$$

#### Potassium channel

$$\alpha_n(V_{soma}) = e^{-0.11 \cdot (V_{soma} - 13)}$$

$$\beta_n(V_{soma}) = e^{-0.08 \cdot (V_{soma} - 13)}$$

$$n_{inf}(V_{soma}) = \frac{1}{1 + \alpha_n(V_{soma})}$$

$$n_\tau(V_{soma}) = \max\left(50 \cdot \frac{\beta_n(V_{soma})}{1 + \alpha_n(V_{soma})}; 2\right)$$

$$\dot{n}(V_{soma}) = \frac{n_{inf} - n}{n_\tau}$$

$$I_K = \gamma_K \cdot n \cdot (E_{revK} - V_{soma})$$

To trigger a BaP, an external current  $I_{BaP}$  is injected in the soma at times  $t \in \{t_1, \dots, t_n\}$  (postsynaptic input times) for a chosen duration  $\delta_{inj}$  with amplitude  $I_{amp}$  (nA):

$$I_{BaP} = \sum_{i=1}^n H(t_i) \cdot (1 - H(t_i + \delta_{inj})) \cdot I_{amp}.$$

The current injected in the soma is filtered in a distance-dependent manner by the dendrite before it reaches the dendritic spine. The distant-dependent BaP amplitude attenuation changes the axial resistance  $g_{BaP}^{adapt}$  (see equations 3 and 4) between the dendrite and the soma as follows (Figure M2C top):

$$g_{BaP}^{adapt} = \beta \cdot g_{diff} \cdot \beta_{soma}, \quad \beta_{soma}(d_{soma}) = 0.1 + \frac{1.4}{1 + e^{0.02 \cdot (d_{soma} - 230.3 \mu m)}} \quad (5)$$

where  $d_{soma}$  is the distance of the spine to the soma and where the factor  $\beta$  is dynamically regulated based on a resource-use equation (Tsodyks and Markram, 1997) with a dampening factor  $\beta_{aux}$  changing the size of the attenuation step  $\delta_{decay}$ :

$$\dot{\beta} = \frac{1 - \beta}{\tau_{rec}} - \delta_{decay} \cdot \beta_{aux}^{-1} \cdot \beta \cdot I_{BaP}(t)$$

$$\dot{\beta}_{aux} = \frac{1 - \beta_{aux}}{\tau_{rec}^{aux}} - \delta_{aux} \cdot \beta_{aux} \cdot I_{BaP}(t).$$

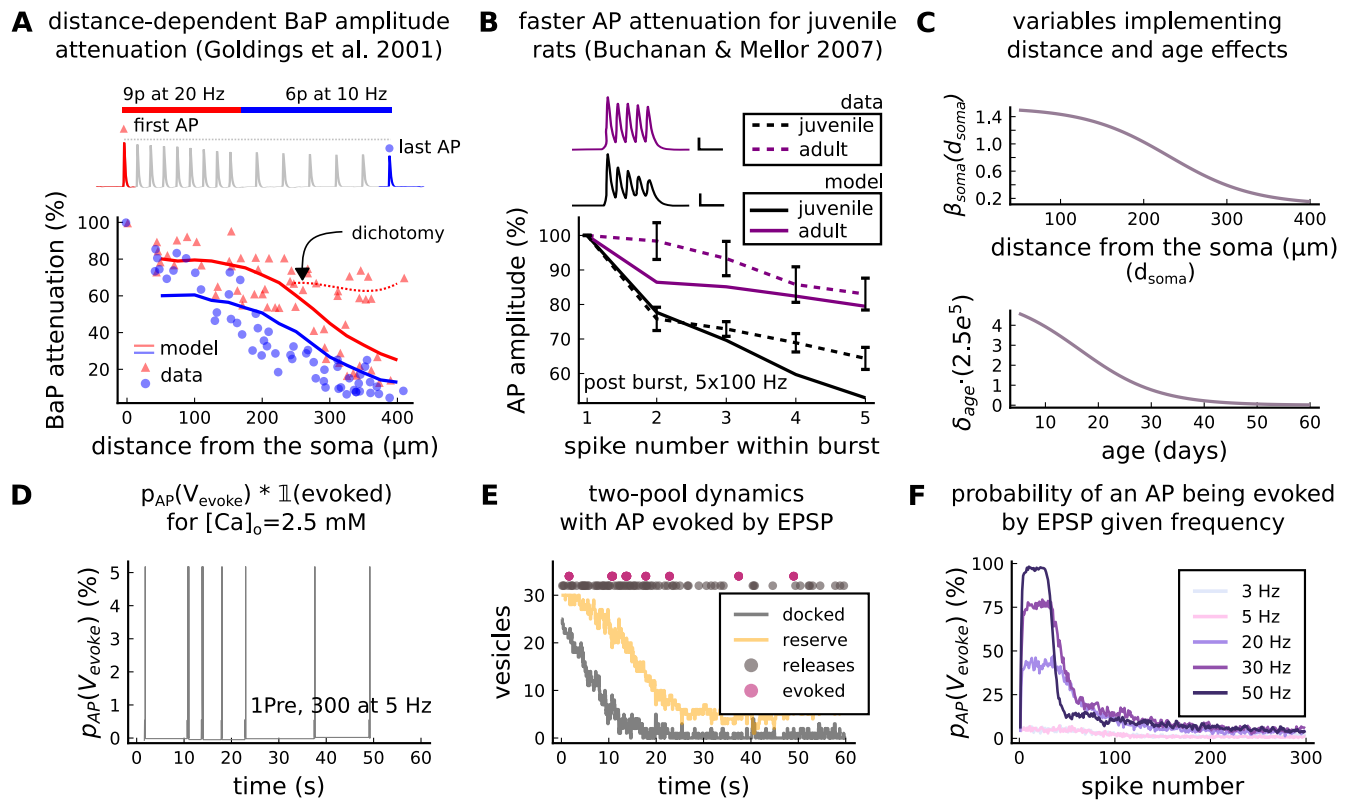

**Figure M2. AP Evoked by EPSP.** **A**) Model and data comparison for the distance-dependent BaP amplitude attenuation measured in the dendrite and varying the distance from the soma. The stimulation in panel A is set to reproduce the same stimulation as [Golding et al. \(2001\)](#). Golding measurements have neurons that are strongly attenuated and weakly attenuated (dichotomy mark represented by the dashed line). However, in this work, we consider only strongly attenuated neurons. **B**) Attenuation of somatic action potential from [Buchanan and Mellor \(2007\)](#) and model in response to five postsynaptic spikes delivered at 100 Hz. The value showed for the model is the spine voltage with distance from the soma set to zero (scale 25 ms, 20 mV). **C**) Top panel shows the  $\beta_{soma}$  used in Equation (5) to modify the axial conductance between the soma and dendrite. Bottom panel shows the age-dependent changes in the step of the resource-use equation, in Equation (6) that accelerates the BaP attenuation and decreases the sodium currents in the Equation (4). **D**) Probability of evoking an AP multiplied by the successfully evoked AP ( $p_{AP}(V_{evoked}) \cdot \mathbb{1}(evoked)$ ) for the protocol 1Pre, 300 at 5 Hz (2.5 mM Ca). **E**) Two-pool dynamics with the stimulation than panel D showing the vesicle release, the reserve and docked pools, and the evoked AP. **F**) Probability of evoking an AP for the protocol 1Pre 300 pulses at different frequencies (3 and 5 Hz have the same probability).

The BaP attenuation model is based on [Golding et al. \(2001\)](#) data for strongly attenuating neurons. Therefore, the second type of attenuation (weakly attenuating) in neurons is not considered (dichotomy in Figure M2A). Figure M2A compares Golding data to our model and illustrates the effect of BaP attenuation in the upper panels of Figure M2A and B.

Table M5 shows the BaP attenuation parameters. The plasticity outcomes as function of the dendritic spine distance from the soma are shown in Figure S2C and Figure S1E.

### Age-dependent BaP adaptation

Age-dependent BaP attenuation modifies the neuronal bursting properties through the maturation and expression of potassium and sodium channels ([Gymnopoulos et al., 2014](#)), therefore changing the interaction of polarizing and depolarizing currents (see Figure M2B) ([Grewe et al., 2010](#); [Jung et al., 1997](#)). We reproduce [Buchanan and Mellor \(2007\)](#) somatic attenuation profiles (Figure M2B) with our model by including an age-dependent BaP amplitude attenuation factor. We define the attenuation factor  $\beta_{age}$  (Figure M2C bottom), as follows.

$$\dot{\beta}_{age} = \frac{1 - I_{age}}{\tau_{rec}^{age}} - \delta_{age} \cdot \beta_{age} \cdot I_{BaP}(t), \quad \delta_{rec}^{age} = \frac{1.391 \cdot 10^{-4}}{1 + e^{0.135(age - 16.482 \text{ days})}}. \quad (6)$$

In Equation (4), the age effects are introduced by multiplying the attenuation factor  $\beta_{age}$  by the sodium  $I_{Na}$  and the external  $I_{BaP}$  currents.

### AP evoked by EPSP

A presynaptic stimulation triggers a BaP if sufficient depolarization is caused by the EPSPs reaching the soma ([Stuart et al., 2016](#)) chapter 13. We included an option to choose whether an EPSP can evoke an AP using an event generator resembling the previous release probability model ( $p_{rel}$ ). Like the  $p_{rel}$ , the BaPs evoked by EPSPs are

| NAME                                               | VALUE                                   | REFERENCE                                                                                         |
|----------------------------------------------------|-----------------------------------------|---------------------------------------------------------------------------------------------------|
| <b>Soma parameters for Na+ and K+ channel</b>      |                                         |                                                                                                   |
| sodium conductance                                 | $\gamma_{Na} = 8 \cdot 10^2 \text{ nS}$ | 0.32 nS/ $\mu\text{m}^2$ (Migliore et al., 1999)<br>see legend commentary                         |
| potassium conductance                              | $\gamma_K = 40 \text{ nS}$              | 0.48 nS/ $\mu\text{m}^2$ (Migliore et al., 1999)<br>see legend commentary                         |
| reversal potential sodium                          | $E_{revNa} = 50 \text{ mV}$             | (Migliore et al., 1999)                                                                           |
| reversal potential potassium                       | $E_{revK} = -90 \text{ mV}$             | (Migliore et al., 1999)                                                                           |
| <b>BaP attenuation parameters</b>                  |                                         |                                                                                                   |
| attenuation step factor (age)                      | $\delta_{age}$                          | see Equation (6) and Figure M2B and C bottom<br>(Buchanan and Mellor, 2007; Golding et al., 2001) |
| attenuation step factor                            | $\delta_{decay} = 1.727 \cdot 10^{-5}$  | adjusted to fit<br>(Buchanan and Mellor, 2007; Golding et al., 2001)                              |
| auxiliary attenuation step factor                  | $\delta_{aux} = 2.304 \cdot 10^{-5}$    | adjusted to fit<br>(Buchanan and Mellor, 2007; Golding et al., 2001)                              |
| recovery time for the attenuation factor           | $\tau_{rec} = 2 \text{ s}$              | adjusted to fit<br>(Buchanan and Mellor, 2007; Golding et al., 2001)                              |
| recovery time for the auxiliary attenuation factor | $\tau_{rec}^{aux} = 2 \text{ s}$        | adjusted to fit<br>(Buchanan and Mellor, 2007; Golding et al., 2001)                              |
| recovery time for the age attenuation factor       | $\tau_{rec}^{age} = 0.5 \text{ s}$      | adjusted to fit<br>(Buchanan and Mellor, 2007; Golding et al., 2001)                              |
| <b>AP evoked by EPSP</b>                           |                                         |                                                                                                   |
| decay time for $V_{evoke}$                         | $\tau_V = 40 \text{ ms}$                | (Hines and Carnevale, 1997)                                                                       |
| delay AP evoked by EPSP                            | $\delta_{delay-AP} = 15 \text{ ms}$     | (Fricker and Miles, 2000)                                                                         |

**Table M5.** The Na+ and K+ conductances intentionally do not match the reference because models with passive dendrite need higher current input to initiate action potentials (Levine and Woody, 1978). Therefore we set it to achieve the desired amplitude on the dendrite and the dendritic spine according to the predictions of (Golding et al., 2001) and (Kwon et al., 2017).

estimated before the postsynaptic simulation. To this, we use a variable  $V_{evoke}$  which is incremented by 1 at each presynaptic time  $t \in (t_1, \dots, t_n)$  and has exponential decay:

$$\begin{cases} \dot{V}_{evoke} = -\frac{V_{evoke}}{\tau_V} & V_{evoke}(0) = 0 \\ V_{evoke} \longrightarrow V_{evoke} + 1. \end{cases} \quad (7)$$

Since the BaPs evoked by EPSP are triggered by the afferent synapses and are limited by their respective docked pools ( $D$ ), we use the previous  $p_{rel}$  to define the probability of an AP to occur. We test the ratio of successful releases from 25 synapses to decide if a BaP is evoked by an EPSP, setting a test threshold of 80%. Therefore, we express the probability of evoking an AP,  $p_{AP}(V_{evoke})$ , with the following test:

$$\frac{\sum^{25} \mathbf{1}(\text{rand} < p_{rel}(V_{evoked}, [Ca^{2+}]_o, D))}{25} > 80 \%.$$

The EPSP summation dynamics on the soma and dendrites depend on the complex neuron morphology (Etherington et al., 2010; Ebner et al., 2019) which was not implemented by our model. Therefore, our "AP evoked by EPSP test" intends to give a simplified way to produce BaPs similar to an integrate-and-fire model (Sterratt et al., 2011).

Previous work suggests that BaPs can be evoked with a  $\sim 5 \%$  probability for low-frequencies (Mayr and Partzsch, 2010) in the Dudek and Bear 1992 experiment ( $[Ca^{2+}]_o = 2.5 \text{ mM}$ ). Our model covers this estimation, but the chance to elicit an AP increases with the frequency (Etherington et al., 2010). This is captured by the  $V_{evoke}$  (in an integrate-and-fire fashion (Stuart et al., 2016)) as shown in Figure M2F. The Figures M2D and E show how a 5 Hz stimulation evokes APs. The delay between the EPSP and the evoked AP is set to  $\delta_{delay-AP} = 15\text{ms}$ , similar to the EPSP-spike latency reported for CA1 neurons (Fricker and Miles, 2000).

## AMPAr

### Markov chain

The AMPAR is modeled with the Markov chain (Figure M3) described by Robert and Howe (2003); Coombs et al. (2017) and adapted to temperature changes according to Postlethwaite et al. (2007). Here, we introduce the

additional parameters  $\rho_f^{AMPA}$ ,  $\rho_b^{AMPA}$  to cover AMPAR temperature-sensitive kinetics (Postlethwaite et al., 2007). The corresponding parameters are given in Table M6.

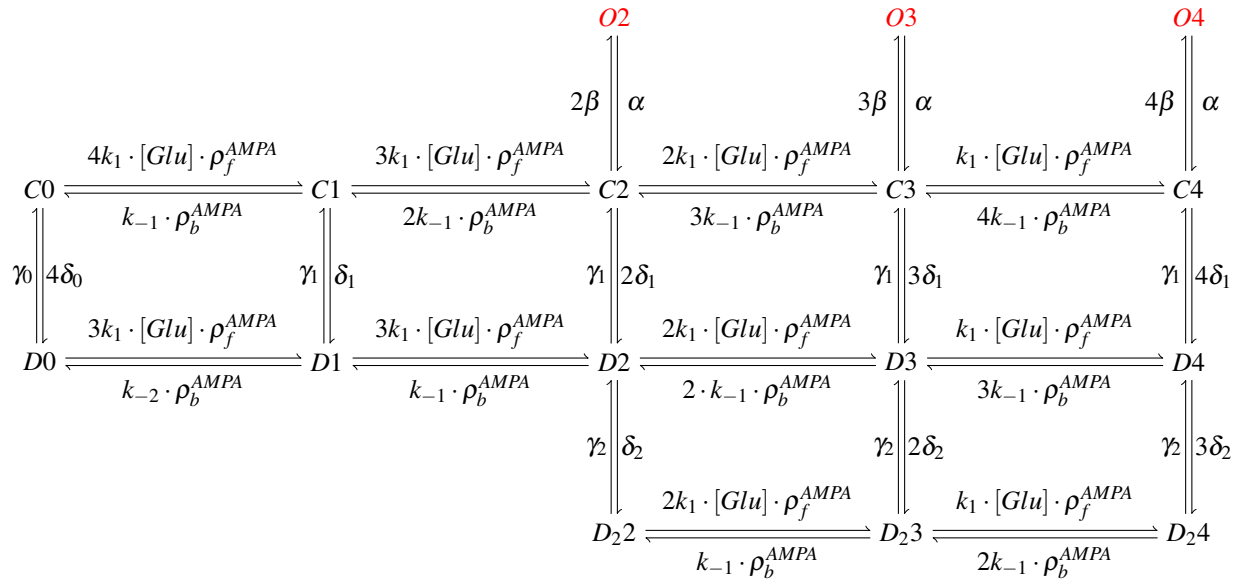

**Figure M3.** AMPAR Markov chain with three sub-conductance states and two desensitisation levels. It includes parameters  $\rho_f^{AMPA}$ ,  $\rho_b^{AMPA}$  (binding and unbinding of glutamate) which depend on temperature. Open states are O2, O3 and O4; closed states are C0, C1, C2, C3 and C4; desensitisation states are D0, D1, D2, D3 and D4; deep desensitisation states are D22, D23 and D24.

The AMPAR current is the sum of the subcurrents associated to the occupancy of the three subconductance states O2, O3 and O4 of the Markov chain in the Figure M3 and described as follows:

$$I_{AMPA} = (E_{revAMPA} - V_{sp}) \cdot (\gamma_{A2} \cdot O2 + \gamma_{A3} \cdot O3 + \gamma_{A4} \cdot O4).$$

The adaptation of the Markov chain from (Robert and Howe, 2003) is made by changing the forward  $\rho_f^{AMPA}$  and backward  $\rho_b^{AMPA}$  rates in a temperature-dependent manner matching the decay time reported by (Postlethwaite et al., 2007):

$$\rho_f^{AMPA} = \frac{10.273}{1 + e^{-0.473 \cdot (T - 31.724^\circ\text{C})}}, \quad \rho_b^{AMPA} = \frac{5.134}{1 + e^{-0.367 \cdot (T - 28.976^\circ\text{C})}}.$$

The effects of temperature change on AMPAR dynamics are presented in Figure M4, which also shows that the desensitisation is unaltered between temperature changes (Figure M4B and C). The recovery time from desensitisation is the same as at room temperature (Robert and Howe, 2003). Desensitisation measurements are required to account for a temperature-dependent change in the rates of the "vertical" transitions in Figure M3, see (Postlethwaite et al., 2007). This can be relevant for presynaptic bursts.

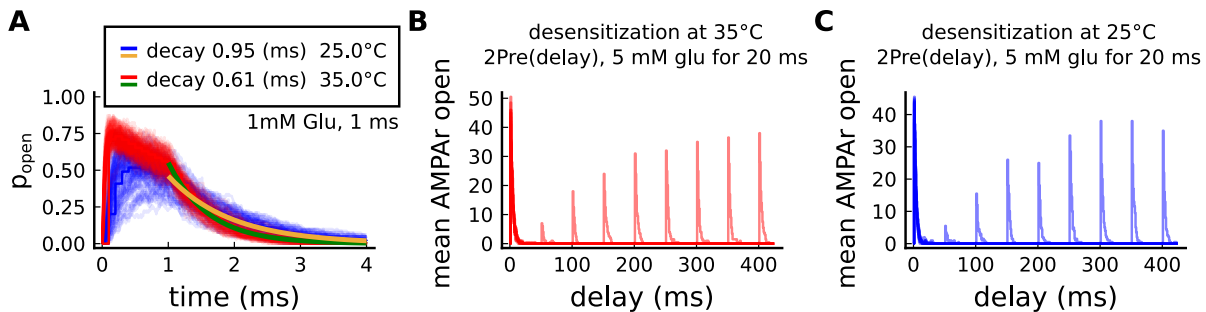

**Figure M4.** Effect of temperature in the AMPAR. A) Probability of AMPAR opening ( $\frac{O2+O3+O4}{N_{AMPA}}$ ) and the decay time at different temperatures in response to 1 mM glutamate during 1 ms (standard pulse). Postlethwaite et al. (2007) data (our model) suggests that AMPAR decay time at 35°C is  $\sim 0.5$  ms ( $\sim 0.6$  ms) and at 25°C is  $\sim 0.65$  ms ( $\sim 0.95$  ms), this shows a closer match towards more physiological temperatures. B) Desensitisation profile of AMPAR at 35°C showing how many AMPAR are open in response to a glutamate saturating pulse (5 mM Glu during 20 ms) separated by an interval (x-axis). C) Same as in panel B but for 25°C.

| NAME                                                 | VALUE                                                | REFERENCE                                                                          |
|------------------------------------------------------|------------------------------------------------------|------------------------------------------------------------------------------------|
| <b>Glutamate parameters</b>                          |                                                      |                                                                                    |
| duration of glutamate in the cleft                   | $glu_{width} = 1 \text{ ms}$                         | (Spruston et al., 1995)                                                            |
| concentration of glutamate in the cleft              | $glu_{amp} = 1 \text{ mM}$                           | (Spruston et al., 1995)                                                            |
| glutamate variability (gamma distribution $\Gamma$ ) | $glu_{cv} = \Gamma(1/0.5^2, 0.5^2)$                  | (Liu et al., 1999)                                                                 |
| glutamate signal                                     | $Glu$                                                | $glu_{cv} \cdot glu_{amp}$<br>for AMPAr, NMDAr and copied to GABA neurotransmitter |
| <b>AMPAr parameters</b>                              |                                                      |                                                                                    |
| number of AMPARs                                     | $N_{AMPA} = 120$                                     | (Bartol et al., 2015)                                                              |
| reversal potential                                   | $E_{rev_{AMPA}} = 0 \text{ mV}$                      | (Bartol et al., 2015)                                                              |
| subconductance O2                                    | $\gamma_{A2} = 15.5 \text{ pS}$                      | 16.3 pS (Coombs et al., 2017)                                                      |
| subconductance O3                                    | $\gamma_{A3} = 26 \text{ pS}$                        | 28.7 pS (Coombs et al., 2017)                                                      |
| subconductance O4                                    | $\gamma_{A4} = 36.5 \text{ pS}$                      | 37.8 pS (Coombs et al., 2017)                                                      |
| glu binding                                          | $k_1 = 1.6 \cdot 10^7 \text{ M}^{-1} \text{ s}^{-1}$ | (Robert and Howe, 2003)                                                            |
| glu unbinding 1                                      | $k_{-1} = 7400 \text{ s}^{-1}$                       | (Robert and Howe, 2003)                                                            |
| glu unbinding 2                                      | $k_{-2} = 0.41 \text{ s}^{-1}$                       | (Robert and Howe, 2003)                                                            |
| closing                                              | $\alpha = 2600 \text{ s}^{-1}$                       | (Robert and Howe, 2003)                                                            |
| opening                                              | $\beta = 9600 \text{ s}^{-1}$                        | (Robert and Howe, 2003)                                                            |
| desensitisation 1                                    | $\delta_1 = 1500 \text{ s}^{-1}$                     | (Robert and Howe, 2003)                                                            |
| desensitisation 2                                    | $\delta_2 = 170 \text{ s}^{-1}$                      | (Robert and Howe, 2003)                                                            |
| desensitisation 3                                    | $\delta_0 = 0.003 \text{ s}^{-1}$                    | (Robert and Howe, 2003)                                                            |
| re-desensitisation 1                                 | $\gamma_1 = 9.1 \text{ s}^{-1}$                      | (Robert and Howe, 2003)                                                            |
| re-desensitisation 2                                 | $\gamma_2 = 42 \text{ s}^{-1}$                       | (Robert and Howe, 2003)                                                            |
| re-desensitisation 3                                 | $\gamma_0 = 0.83 \text{ s}^{-1}$                     | (Robert and Howe, 2003)                                                            |

**Table M6.** Parameter values for the AMPAr Markov chain and glutamate release affecting NMDAr, AMPAr. Properties of GABA release are the same as those for glutamate.

## Postsynaptic $\text{Ca}^{2+}$ influx

The effects of experimental conditions in the calcium dynamics are due to receptors, ion channels and enzymes. A leaky term models the calcium resting concentration in the Equation (8). The calcium fluxes from NMDAr and VGCCs (T, R, L types) are given in Equation (9). The diffusion term through the spine neck is expressed in Equation (10). Finally, the buffer, the optional dye and the enzymatic reactions are given in Equation (11) (parameter values given at the Table M7):

$$\dot{Ca} = \frac{Ca_{\infty} - Ca}{\tau_{Ca}} + \quad (8)$$

$$\frac{Ca_{NMDA} + I_T + I_R + I_L}{2 \cdot F \cdot A_{sp}} + \quad (9)$$

$$\frac{\max(Ca_{\infty}, Ca/3) - Ca}{\tau_{CaDiff}} \quad (10)$$

$$Buf \dot{f}_{Ca} - Dye + enzymes. \quad (11)$$

Despite the driving force to the resting concentration,  $Ca_{\infty} = 50 \text{ nM}$ , the tonic opening of T-type channels causes calcium to fluctuate making its mean value dependent on temperature, extracellular calcium and voltage. The effects of this tonic opening in various experimental conditions are shown in Figure S4C. To avoid modelling dendritic calcium sources, we use a dampening term as one-third of the calcium level since calcium imaging comparing dendrite and spine fluorescence have shown this trend (Segal and Korkotian, 2014). The Equation (10) implements the diffusion of calcium from the spine to the dendrite through the neck. The time constant for the diffusion coefficient  $\tau_{CaDiff}$ , is estimated as described in (Holcman et al., 2005). The calcium buffer and the optional dye are described as a two states reaction system (Sabatini et al., 2002):

$$Buf \dot{f}_{Ca} = k_{on}^{Buf} \cdot (Buf_{con} - Buf_{fCa}) \cdot Ca - k_{off}^{Buf} \cdot Buf_{fCa}$$

$$Dye = k_{on}^{Fluo5} \cdot (Fluo5_{con} - Dye) \cdot Ca - k_{off}^{Fluo5} \cdot Dye.$$

We estimated the calcium reversal potential for the calcium fluxes using the Goldman–Hodgkin–Katz (GHK) flux equation described in (Hille, 1978). The calcium ion permeability,  $P_{Ca}$ , was used as a free parameter adjusting a

single EPSP to produce a calcium amplitude of  $\sim 3 \mu M$  as reported in [Chang et al. \(2017\)](#).

$$\phi = z_{Ca} \cdot V_{sp} \cdot F / R \cdot (T + 273.15K)$$

$$\Phi_{Ca} = -P_{Ca} \cdot z_{Ca} \cdot F \cdot \phi \cdot \frac{[Ca]_i - [Ca]_o \cdot e^{-\phi}}{1 - e^{-\phi}} \quad (12)$$

$\Phi_{Ca}$  is used to determine the calcium influx through NMDAr and VGCC in the Equations 13, 14, 15 and 16.

| NAME                            | VALUE                                                                                         | REFERENCE                                                                                                                             |
|---------------------------------|-----------------------------------------------------------------------------------------------|---------------------------------------------------------------------------------------------------------------------------------------|
| <b>Buffer and dye</b>           |                                                                                               |                                                                                                                                       |
| association buffer constant     | $k_{on}^{Buff} = 0.247 \mu M^{-1} ms^{-1}$                                                    | ( <a href="#">Bartol et al., 2015</a> )                                                                                               |
| dissociation buffer constant    | $k_{off}^{Buff} = 0.524 ms^{-1}$                                                              | ( <a href="#">Bartol et al., 2015</a> )                                                                                               |
| buffer concentration            | $Buf_{fcon} = 62 \mu M$                                                                       | $76.7 \mu M$ ( <a href="#">Bartol et al., 2015</a> )                                                                                  |
| <b>Calcium dynamics</b>         |                                                                                               |                                                                                                                                       |
| Calcium baseline concentration  | $Ca_{\infty} = 50 nM$                                                                         | $37 \pm 5$ to $54 \pm 5 nM$ ( <a href="#">Maravall et al., 2000</a> )                                                                 |
| Calcium decay time              | $\tau_{Ca} = 10 ms$                                                                           | $50$ to $500 ms$ for with dye ( <a href="#">Maravall et al., 2000</a> )<br>therefore $< 50$ to $500 ms$ undyed (unbuffered)           |
| Calcium diffusion               | $D_{Ca} = 0.3338 \mu m^2 ms^{-1}$                                                             | $0.22$ to $0.4 \mu m^2 ms^{-1}$ ( <a href="#">Bartol et al., 2015</a> ; <a href="#">Holcman et al., 2005</a> )                        |
| Calcium diffusion time constant | $\tau_{CaDiff} = \frac{Vol_{sp}}{2D_{Ca} \cdot D_{neck}} + \frac{L_{neck}}{2D_{Ca}} = 0.5 ms$ | $8 ms$ for a $V_{sp} = 0.7 \mu m^3$ ( <a href="#">Holcman et al., 2005</a> )                                                          |
| <b>GHK</b>                      |                                                                                               |                                                                                                                                       |
| temperature                     | $T = 35^{\circ}C$                                                                             | converted to Kelvin in the Equation (12) given the protocol                                                                           |
| faraday constant                | $F = 96.485 C mol^{-1}$                                                                       | ( <a href="#">Hille, 1978</a> )                                                                                                       |
| gas constant                    | $R = 8.314 J K^{-1} mol^{-1}$                                                                 | ( <a href="#">Hille, 1978</a> )                                                                                                       |
| Calcium permeability            | $P_{Ca} = 0.045 \mu m ms^{-1}$                                                                | adjusted to produce $3 \mu M$ Calcium in response to a Glu release<br>supplementary files from ( <a href="#">Chang et al., 2017</a> ) |
| Calcium ion valence             | $z_{Ca} = 2$                                                                                  | ( <a href="#">Hille, 1978</a> )                                                                                                       |

Table M7. Postsynaptic calcium dynamics parameters.

## NMDAr - GluN2A and GluN2B

### Markov chain

In the hippocampus, the NMDAr are principally heteromers composed of the obligatory subunit GluN1 and either the GluN2A or GluN2B subunits. These N2 subunits guide the activation kinetics of these receptors with the GluN1/GLUN2B heteromers displaying slow kinetics ( $\sim 250ms$ ) and the GluN1/GluN2A heteromers displaying faster kinetics ( $\sim 50ms$ ). We modeled both NMDA subtypes. The NMDAr containing GluN2A is modeled with the following Markov chain ([Popescu et al., 2004](#)) where we introduce the additional parameters  $\rho_f^{NMDA}$ ,  $\rho_b^{NMDA}$ :

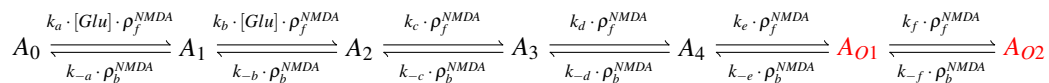

The NMDAr containing GluN2B is modeled with a Markov chain based on the above GluN2A scheme. We decreased the rates by  $\sim 75\%$  in order to match the GluN2B decay at  $25^{\circ}C$  as published in ([Iacobucci and Popescu, 2018](#)).

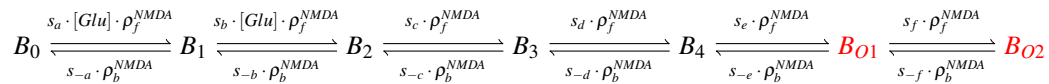

The different rates are given in Table M8.

### NMDAr and age switch

The age-dependent expression ratio of the subtypes GluN2A and GluN2B ( $r_{age}$ ) was obtained from hippocampal mice data ([Sinclair et al., 2016](#)). We added noise to this ratio causing  $\sim 1$  NMDAr subunit to flip towards GluN2A or GluN2B (see Figure M5E). The population of 15 NMDAr is divided in the two subtypes according to the ratio



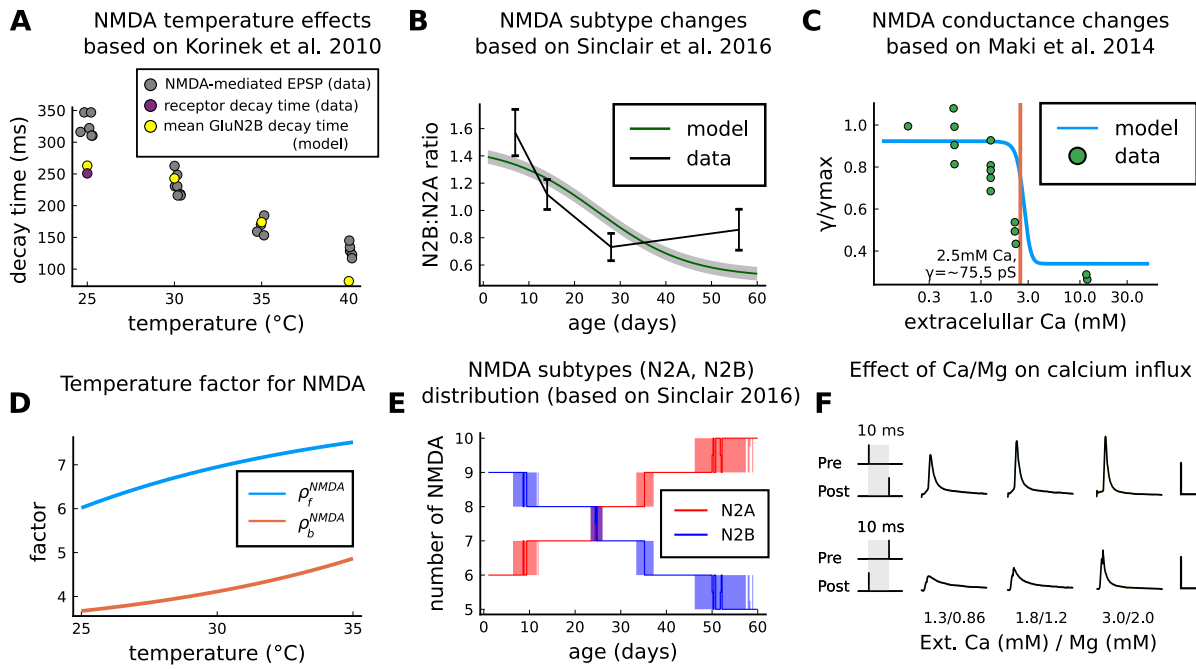

**Figure M5. NMDAr changes caused by age, temperature and extracellular and magnesium concentrations in the aCSFA** Decay time of the NMDAr-mediated EPSP recorded from neocortical layer II/III pyramidal neurons (grey) (Korinek et al., 2010) compared to the decay time from the GluN2B channel estimated by our model (yellow) and data from Iacobucci's single receptor recording (purple) (Iacobucci and Popescu, 2018). **B**) Comparison of our implementation of GluN2B:GluN2A ratio and the GluN2B:GluN2A ratio from the mice's CA1. **C**) Comparison of our implementation of NMDAr conductance change in response to the extracellular against data (Maki and Popescu, 2014). **D**) Forward and backwards temperature factors implemented to approximate NMDAr subtypes decay times at room temperature (Iacobucci and Popescu, 2018) and temperature changes observed in (Korinek et al., 2010). **E**) NMDAr subtypes number on our model given age. We add noise to have a smoother transition between different ages. **F**) Calcium concentration changes for causal and anticausal protocols in response to different aCSF calcium and magnesium compositions with fixed Ca/Mg ratio (1.5). Scale 50 ms and 5  $\mu M$ .

plotted in Figure M5B as function of age. The ratio to define the number NMDAr subtypes as function of age reads:

$$r_{age} = 0.507 + \frac{0.964}{1 + e^{0.099 \cdot (age - 25.102 \text{ days})}} + \mathcal{N}(0, 0.05)$$

$$N_{GluN2B} = \text{round} \left( \frac{N_{NMDA} \cdot r_{age}}{r_{age} + 1} \right)$$

$$N_{GluN2A} = \text{round} \left( \frac{N_{NMDA}}{r_{age} + 1} \right).$$

The round term in the two previous equations ensures that we have an integer value for the NMDAr subtypes, making the stair shaped curve seen in Figure M5E.

### NMDAr and temperature

We adjusted the GluN2A and GluN2B forward and backward rates to follow the temperature effects on NMDAr-mediated EPSP (Korinek et al., 2010) (see Figure M5A and D). Because GluN2B dominates the NMDAr-mediated EPSP, we fit its decay time on the NMDAr-mediated EPSP as function of temperature as reported by Korinek et al. (2010) using a logistic functions  $\rho_f^{NMDA}$  and  $\rho_b^{NMDA}$ . The decay time comparison is shown in Figure M5A. Then, we applied the same temperature factor  $\rho_f^{NMDA}$  and  $\rho_b^{NMDA}$  for GluN2A. The decay times of GluN2A and GluN2B are similar to the ones reported by Iacobucci (Iacobucci and Popescu, 2018). The forward and backward factors are described as follows:

$$\rho_f^{NMDA} = -1230.680 + \frac{1239.067}{1 + e^{-0.099 \cdot (T + 37.631^\circ C)}}, \quad \rho_b^{NMDA} = 3.036 + \frac{1621.616}{1 + e^{-0.106 \cdot (T - 98.999^\circ C)}}.$$

| NAME                                   | VALUE                        | ENCE                                                                       |
|----------------------------------------|------------------------------|----------------------------------------------------------------------------|
| <b>NMDAr (GluN2A)</b>                  |                              |                                                                            |
| glutamate binding                      | $k_a = 34 \mu M^{-1} s^{-1}$ | (Popescu et al., 2004)                                                     |
| glutamate binding                      | $k_b = 17 \mu M^{-1} s^{-1}$ | (Popescu et al., 2004)                                                     |
| forward rate                           | $k_c = 127 s^{-1}$           | (Popescu et al., 2004)                                                     |
| forward rate                           | $k_d = 580 s^{-1}$           | (Popescu et al., 2004)                                                     |
| opening rate                           | $k_e = 2508 s^{-1}$          | (Popescu et al., 2004)                                                     |
| opening rate                           | $k_f = 3449 s^{-1}$          | (Popescu et al., 2004)                                                     |
| closing rate                           | $k_{-f} = 662 s^{-1}$        | (Popescu et al., 2004)                                                     |
| closing rate                           | $k_{-e} = 2167 s^{-1}$       | (Popescu et al., 2004)                                                     |
| backward rate                          | $k_{-d} = 2610 s^{-1}$       | (Popescu et al., 2004)                                                     |
| backward rate                          | $k_{-c} = 161 s^{-1}$        | (Popescu et al., 2004)                                                     |
| glutamate unbinding                    | $k_{-b} = 120 s^{-1}$        | (Popescu et al., 2004)                                                     |
| glutamate unbinding                    | $k_{-a} = 60 s^{-1}$         | (Popescu et al., 2004)                                                     |
| <b>NMDAr (GluN2B)</b>                  |                              |                                                                            |
| glutamate binding                      | $s_b = 0.25k_b$              | adapted from GluN2A (Popescu et al., 2004; Iacobucci and Popescu, 2018)    |
| glutamate binding                      | $s_c = 0.25k_c$              | adapted from GluN2A (Popescu et al., 2004; Iacobucci and Popescu, 2018)    |
| forward rate                           | $s_e = 0.25k_e$              | adapted from GluN2A (Popescu et al., 2004; Iacobucci and Popescu, 2018)    |
| forward rate                           | $s_d = 0.25k_d$              | adapted from GluN2A (Popescu et al., 2004; Iacobucci and Popescu, 2018)    |
| opening rate                           | $s_e = 0.25k_e$              | adapted from GluN2A (Popescu et al., 2004; Iacobucci and Popescu, 2018)    |
| opening rate                           | $s_f = 0.25k_f$              | adapted from GluN2A (Popescu et al., 2004; Iacobucci and Popescu, 2018)    |
| closing rate                           | $s_{-f} = 0.23k_{-f}$        | adapted from GluN2A (Popescu et al., 2004; Iacobucci and Popescu, 2018)    |
| closing rate                           | $s_{-e} = 0.23k_{-e}$        | adapted from GluN2A (Popescu et al., 2004; Iacobucci and Popescu, 2018)    |
| backward rate                          | $s_{-d} = 0.23k_{-d}$        | adapted from GluN2A (Popescu et al., 2004; Iacobucci and Popescu, 2018)    |
| backward rate                          | $s_{-c} = 0.23k_{-c}$        | adapted from GluN2A (Popescu et al., 2004; Iacobucci and Popescu, 2018)    |
| glutamate unbinding                    | $s_{-b} = 0.23k_{-b}$        | adapted from GluN2A (Popescu et al., 2004; Iacobucci and Popescu, 2018)    |
| glutamate unbinding                    | $s_{-a} = 0.23k_{-a}$        | adapted from GluN2A (Popescu et al., 2004; Iacobucci and Popescu, 2018)    |
| <b>other parameters</b>                |                              |                                                                            |
| total number of NMDAr                  | $N_{NMDA} = 15$              | 5-30 (Spruston et al., 1995; Bartol et al., 2015; Nimchinsky et al., 2004) |
| distribution of GluN2A and GluN2B      | defined by $r_{age}$         | (Sinclair et al., 2016)                                                    |
| NMDAr conductance depending on calcium | $\gamma_{NMDA}$              | (Maki and Popescu, 2014)                                                   |
| NMDAr reversal potential               | $E_{revNMDA} = 0 mV$         | (Destexhe et al., 1994)                                                    |
| fraction of calcium carried by NMDAr   | $f_{Ca} = 0.1$               | (Griffith et al., 2016)                                                    |

Table M8. NMDAr parameters.

### NMDAr current and $Ca^{2+}$ -dependent conductance

NMDAr conductance is modulated by external calcium and is modelled according to the next equations using NMDAr subconductances  $A_{O1}$  and  $A_{O2}$  (GluN2A), and  $B_{O1}$  and  $B_{O2}$  (GluN2B).

$$\gamma_{NMDA} = 33.949 + \frac{58.388}{1 + e^{4 \cdot ([Ca^{2+}]_o - 2.701 \text{ mM})}} pS$$

$$B(V_{sp}, [Mg]_o) = \frac{1}{1 + \frac{[Mg]_o}{3.57} \cdot e^{-0.062 \cdot V_{sp}}}$$

$$NMDA = (B_{O1} + B_{O2} + A_{O1} + A_{O2}) \cdot B(V_{sp}, [Mg]_o) \cdot \gamma_{NMDA}$$

$$I_{NMDA} = (E_{revNMDA} - V_{sp}) \cdot NMDA$$

We now modify the conductance function  $\gamma_{NMDA}$  reported by Maki and Popescu (2014). The reported NMDAr conductance at  $[Ca^{2+}]_o = 1.8 \text{ mM}$  is  $53 \pm 5 pS$ . Here, we used the higher conductance  $91.3 pS$  for NMDAr (for both subtypes) at  $[Ca^{2+}]_o = 1.8 \text{ mM}$  to compensate for the small number of NMDAr reported by Nimchinsky et al. (2004). Hence, we cover Maki and Popescu (2014) data differently to account for this constraint: this caused a right-shift in the NMDA-conductance curve (Figure M5C). The calcium influx  $Ca_{NMDA}$  is modulated by the GHK factor, Equation (12), as function of the internal and external calcium concentrations and the spine voltage:

$$Ca_{NMDA} = f_{Ca} \cdot \Phi_{Ca} \cdot NMDA. \quad (13)$$

The combined effect of Magnesium (Jahr and Stevens, 1990) and extracellular Calcium concentration are displayed in Figure M5F.

## GABA(A) receptor

### Markov chain

We used the GABA(A) receptor Markov chain (Figure M6) presented in Bush and Sakmann 1990 (Busch and Sakmann, 1990; Destexhe et al., 1998) and we estimated temperature adaptations using Otis and Mody 1992 (Otis and Mody, 1992) measurements.

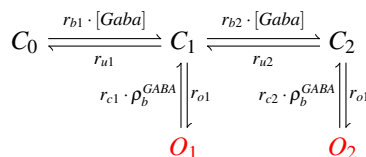

Figure M6. GABA<sub>r</sub> Markov chain model. Closed states ( $C_0$ ,  $C_1$  and  $C_2$ ) open in response to GABA<sub>r</sub> and can go either close again or open ( $O_1$  and  $O_2$ )

### GABA(A)r and temperature

Because the amplitude of GABA(A) current is altered by the GABA<sub>r</sub> shift (Rinetti-Vargas et al., 2017) during development, we applied temperature changes only to the closing rates using a logistic the function  $\rho_b^{GABA}$  estimated by fitting Otis and Mody (1992) measurements (data comparison in the Figure M7B and E).

$$\rho_b^{GABA} = 1.470 - \frac{-1.279}{1 + e^{0.191 \cdot (T - 32.167)}}$$

### GABA(A)r current and age switch

The GABA(A)r-driven current changes during development (Meredith et al., 2003) passing from depolarizing (excitatory) to hyperpolarizing (inhibitory) (Chamma et al., 2012). That is, the reversal potential of chloride ions permeating GABA(A)r shifts from above the membrane resting potential (inward driving force - excitatory) to below the membrane resting potential (outward driving force - inhibitory) (Rinetti-Vargas et al., 2017). Such effect mediated by chloride ions is associated with the KCC2 pump (K Cl co-transporter) which becomes efficient in extruding chloride ions during maturation (Rinetti-Vargas et al., 2017). To cover the GABA(A)r shift, we fit the chloride reversal potential ( $E_{rev}^{Cl}$ ) using the data published by Rinetti-Vargas et al. (2017) (Figure M7C):

$$E_{rev}^{Cl} = -92.649 + \frac{243.515}{1 + e^{0.091 \cdot (age - 0.691 \text{ days})}}$$

$$I_{GABA} = (O_1 + O_2) \cdot (E_{rev}^{Cl} - V_{dend}) \cdot \gamma_{GABA}$$

Table M9 presents the parameters to model the GABA<sub>r</sub>.

| NAME                          | VALUE                                  | ENCE                                                    |
|-------------------------------|----------------------------------------|---------------------------------------------------------|
| <b>GABA(A) receptor</b>       |                                        |                                                         |
| number of GABA                | $N_{GABA} = 34$                        | 30 (Edwards et al., 1990)                               |
| chloride reversal potential   | see age-dependent equation             | (Rinetti-Vargas et al., 2017)                           |
| GABA <sub>r</sub> conductance | $\gamma_{GABA} = 36 \text{ pS}$        | 27 pS (Macdonald et al., 1989)                          |
| binding                       | $r_{b1} = 20 \cdot 10^6 M^{-1} s^{-1}$ | same as (Busch and Sakmann, 1990)                       |
| unbinding                     | $r_{u1} = 4.6 \cdot 10^3 s^{-1}$       | same as (Busch and Sakmann, 1990)                       |
| binding                       | $r_{b2} = 10 \cdot 10^6 M^{-1} s^{-1}$ | same as (Busch and Sakmann, 1990)                       |
| unbinding                     | $r_{u2} = 9.2 \cdot 10^3 s^{-1}$       | same as (Busch and Sakmann, 1990)                       |
| opening pore                  | $r_{ro1} = 3.3 \cdot 10^3 s^{-1}$      | same as (Busch and Sakmann, 1990)                       |
| opening pore                  | $r_{ro2} = 10.6 \cdot 10^3 s^{-1}$     | same as (Busch and Sakmann, 1990)                       |
| closing pore                  | $r_{e2} = 400 s^{-1}$                  | based on (Busch and Sakmann, 1990; Otis and Mody, 1992) |
| closing pore                  | $r_{e2} = 9.8 \cdot 10^3 s^{-1}$       | based on (Busch and Sakmann, 1990; Otis and Mody, 1992) |

Table M9. GABA<sub>r</sub> parameters.

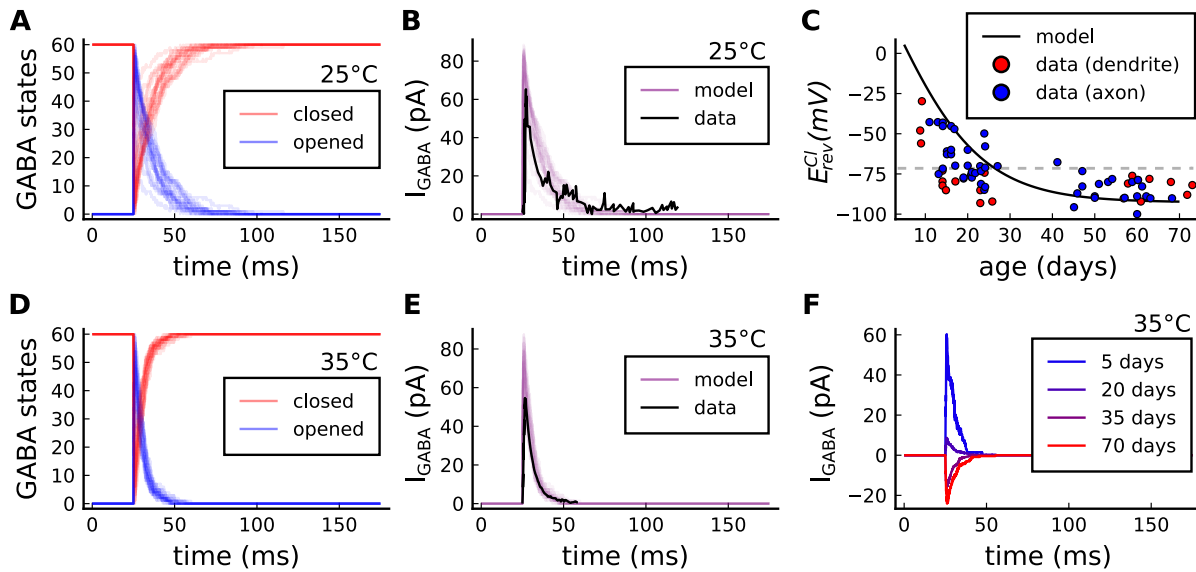

**Figure M7. GABA(A)r current, kinetics and chloride reversal potential.** A) States of GABA(A)r Markov chain at 25°C in response to a presynaptic stimulation. Opened =  $O_1 + O_2$ , closed =  $C_0 + C_1 + C_2$ . B) Model and data comparison (Otis and Mody, 1992) for GABA(A)r current at 25°C. Even though data were recorded from P70 at 25°C and P15 at 35°C, we normalize the amplitude to invert the polarity and compare the decay time. This is done since the noise around P15 can either make GABA<sub>A</sub>r excitatory or inhibitory as shown by  $E_{rev}^{Cl}$  data in panel C. C) Chloride reversal potential ( $E_{rev}^{Cl}$ ) fitted to Rinetti-Vargas et al. (2017) data. Note we used both profiles from axon and dendrite age-dependent  $E_{rev}^{Cl}$  changes since exclusive dendrite data is scarce. D) States of simulated from GABA(A)r Markov chain at 35°C in response to a presynaptic stimulation. E) Model and data comparison (Otis and Mody, 1992) for GABA(A)r current at 25°C (same normalization as in panel B). F) Change in the polarization of GABA(A)r currents given the age driven by the  $E_{rev}^{Cl}$ .

## VGCC - T, R and L type

### Markov chain

A stochastic VGCC model was devised using the channel gating measurements from CA1 rat's (2-8 weeks) pyramidal neurons by Magee and Johnston 1995 at room temperature (Magee and Johnston, 1995). Our model has three different VGCC subtypes described by the Markov chains in Figure M8: the T-type (low-voltage), the R-type (medium-to-high-voltage) and the L-type (high-voltage).

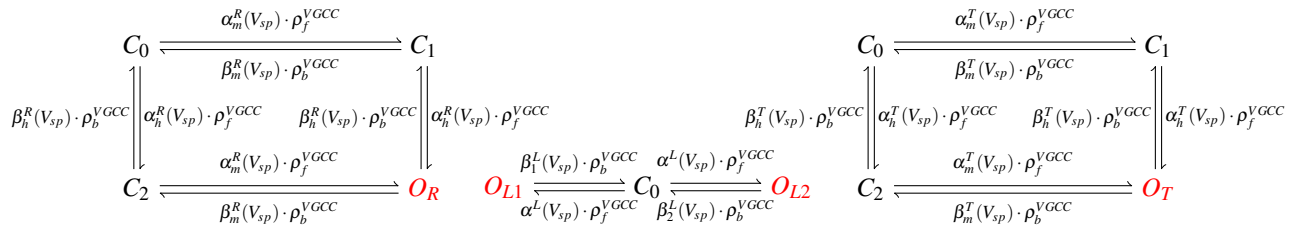

**Figure M8.** From left to right, R-, L-, and T-type VGCCs Markov chain adapted from Magee and Johnston 1995 (Magee and Johnston, 1995). The R- (left scheme) and T-type (right scheme) have a single open state (red colour), respectively,  $O_R$  and  $O_T$ . The L-type VGCC (middle) has two open states,  $O_{L1}$  and  $O_{L2}$ .

The VGCC Markov chain derived from Magee and Johnston 1995 (Magee and Johnston, 1995) are composed of two gates (h,m) for T- (Figure M9A and D) and R-types (Figure M9B and E) and a single gate for L-type (Figure M9C), as described in the equations below.

### R-type h-gate rates

$$\tau_h^{R*} = 100$$

$$h_{inf}^{R*}(V_{sp}) = \frac{1}{1 + e^{\frac{V_{sp} + 39}{9.2}}}$$

$$\alpha_h^R(V_{sp}) = \frac{h_{inf}^{R*}}{\tau_h^R}$$

$$\beta_h^R(V_{sp}) = \frac{1 - h_{inf}^{R*}}{\tau_h^R}$$

### R-type m-gate rates

$$\begin{aligned}\beta_m^{R*} &= 40 \\ m_{inf}^{R*} &= \frac{1}{1 + e^{\frac{3-10}{8}}} \\ \alpha_m^{R*} r &= \beta_m^{R*} \cdot \frac{m_{inf}^{R*}}{1 - m_{inf}^{R*}} \\ \tau_m^R &= \frac{1}{\alpha_m^{R*} + \beta_m^{R*}} \\ m_{inf}^R &= \frac{1}{1 + e^{\frac{3-V_{sp}}{8}}} \\ \alpha_m^R(V_{sp}) &= \frac{m_{inf}^R}{\tau_m^R} \\ \beta_m^R(V_{sp}) &= \frac{1 - m_{inf}^R}{\tau_m^R}\end{aligned}$$

### T-type h-gate rates

$$\begin{aligned}\tau_h^{T*} &= 50 \\ h_{inf}^{T*}(V_{sp}) &= \frac{1}{1 + e^{\frac{V_{sp}+70}{6.5}}} \\ \alpha_h^T(V_{sp}) &= \frac{h_{inf}^T}{\tau_h^T} \\ \beta_h^T(V_{sp}) &= \frac{1 - h_{inf}^T}{\tau_h^T}\end{aligned}$$

### T-type m-gate rates

$$\begin{aligned}\beta_m^{T*} &= 1 \\ m_{inf}^{T*} &= \frac{1}{1 + e^{\frac{-32+20}{7}}} \\ \alpha_m^{T*} r &= \beta_m^{T*} \cdot \frac{m_{inf}^{T*}}{1 - m_{inf}^{T*}} \\ \tau_m^T &= \frac{1}{\alpha_m^{T*} + \beta_m^{T*}} \\ m_{inf}^T &= \frac{1}{1 + e^{\frac{-32-V_{sp}}{7}}} \\ \alpha_m^T(V_{sp}) &= \frac{m_{inf}^T}{\tau_m^T} \\ \beta_m^T(V_{sp}) &= \frac{1 - m_{inf}^T}{\tau_m^T}\end{aligned}$$

### L-type rates

$$\begin{aligned}\alpha^L(V_{sp}) &= \frac{0.83}{1 + e^{\frac{13.7-V_{sp}}{6.1}}} \\ \beta_1^L(V_{sp}) &= \frac{0.53}{1 + e^{\frac{V_{sp}-11.5}{6.4}}} \\ \beta_2^L(V_{sp}) &= \frac{1.86}{1 + e^{\frac{V_{sp}-18.8}{6.17}}}\end{aligned}$$

### VGCC and temperature

We used the same temperature factor for every VGCC subtype, respectively  $\rho_f^{VGCC}$  and  $\rho_b^{VGCC}$  (see Figure M9F), as follows:

$$\begin{aligned}\rho_f^{VGCC} &= 2.503 - \frac{0.304}{1 + e^{1.048 \cdot (T-30.668)}} \\ \rho_b^{VGCC} &= 0.729 + \frac{3.225}{1 + e^{-0.330 \cdot (T-36.279)}}\end{aligned}$$

The VGCC subtypes are differently sensitive to temperature, with temperature factors for decay times ranging from 2 (Iftinca et al., 2006) to 50-fold (Peloquin et al., 2008). It further complicates if T-type isoforms are considered. Indeed, they can have temperature factors that accelerate or slow down the kinetics. For instance, when passing from room to physiological temperatures, the isoform Ca<sub>v</sub>3.3 has a closing time ~50 % faster (Iftinca et al., 2006) and the isoform Ca<sub>v</sub>3.1 becomes ~15 % slower. To simplify, the same temperature factor is adopted to all VGCC subtypes.

### VGCC currents

The VGCC currents are integrated to the dendritic spine and estimated using the GHK Equation (12), as follows:

$$I_T = \gamma_T \cdot \Phi_{Ca} \cdot O_T \quad (14)$$

$$I_R = \gamma_R \cdot \Phi_{Ca} \cdot O_R \quad (15)$$

$$I_L = \gamma_L \cdot \Phi_{Ca} \cdot (O_{L1} + O_{L2}) \quad (16)$$

Table M10 presents the parameters to model the VGCC channels.

| NAME                    | VALUE                          | ENCE                                |
|-------------------------|--------------------------------|-------------------------------------|
| <b>VGCC</b>             |                                |                                     |
| VGCC T-type conductance | $\gamma_{CaT} = 12 \text{ pS}$ | same as (Magee and Johnston, 1995)  |
| VGCC R-type conductance | $\gamma_{CaR} = 17 \text{ pS}$ | same as (Magee and Johnston, 1995)  |
| VGCC L-type conductance | $\gamma_{CaL} = 27 \text{ pS}$ | same as (Magee and Johnston, 1995)  |
| number of VGCCs         | 3 for each subtype             | 1 to 20 (Higley and Sabatini, 2012) |

Table M10. VGCC parameters

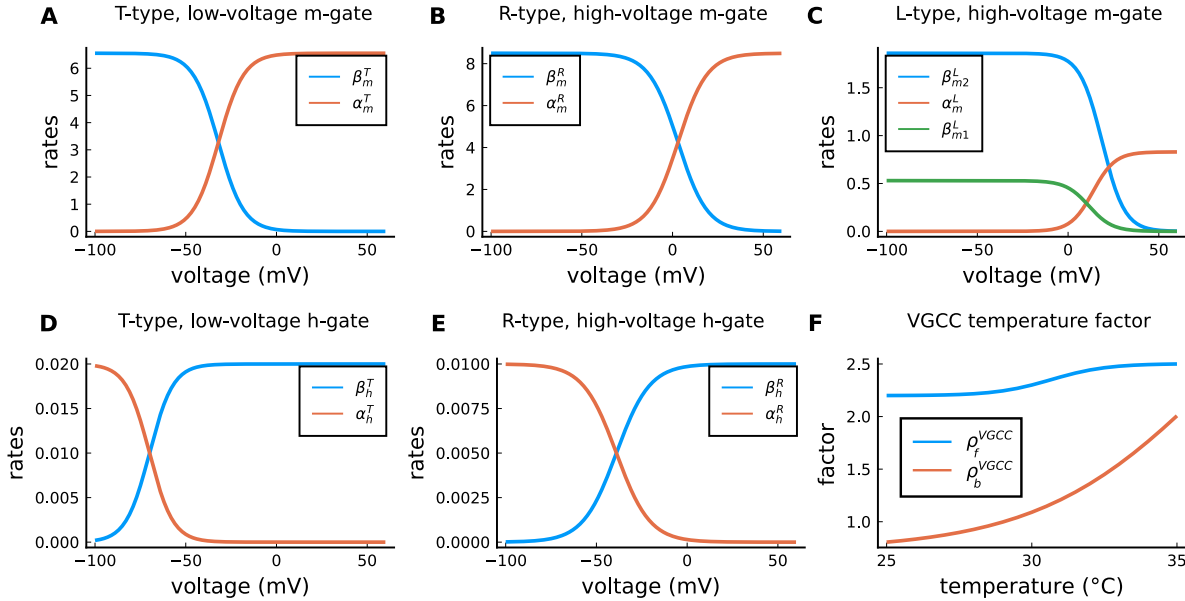

**Figure M9. VGCC rates and temperature factors.** **A)** Activation ( $\alpha_m(V_{sp})$ ) and deactivation rates ( $\beta_m(V_{sp})$ ) for the T-type m-gate. **B)** Activation ( $\alpha_m(V_{sp})$ ) and deactivation rates ( $\beta_m$ ) for the R-type m-gate. **C)** Activation ( $\alpha_m(V_{sp})$ ) and both deactivation rates ( $\beta_2^L(V_{sp})$  and  $\beta_1^L(V_{sp})$ ) for the L-type VGCC. **D)** Activation ( $\alpha_h(V_{sp})$ ) and deactivation rates ( $\beta_h(V_{sp})$ ) for the T-type h-gate. **E)** Activation ( $\alpha_h(V_{sp})$ ) and deactivation rates ( $\beta_h(V_{sp})$ ) for the R-type h-gate. **F)** Temperature factor applied to all the rates, forward change ( $\rho_f^{VGCC}$ ) for the  $\alpha$  rates and backward change ( $\rho_b^{VGCC}$ ) for the  $\beta$  rates.

## SK channel

The small potassium (SK) channel produces hyperpolarizing currents which are enhanced in the presence of intracellular calcium elevations. The SK channel current was based on the description of Griffith et al. (2016) as follows:

$$r(Ca) = \frac{Ca^\sigma}{Ca^\sigma + h_{SK}^\sigma}$$

$$m_{sk} = \frac{r(Ca) \cdot \rho_f^{SK} - m_s}{\tau_{SK} \cdot \rho_b^{SK}}$$

$$I_{SK} = \gamma_{SK} \cdot (E_{rev}^{SK} - V_{sp}) \cdot m_{sk} \cdot N_{SK}.$$

We chose a temperature factor to decrease the decay time of hyperpolarizing currents by a factor of two when passing from physiological to room temperature. Despite that the ences for temperature effects on the SK channel are few, a report (van Herck et al., 2018) suggests a left-ward shift in the SK half-activation when changing from 37°C ( $h_{SK} = 0.38 \pm 0.02 \mu M$ ) to 25°C ( $h_{SK} = 0.23 \pm 0.01 \mu M$ ); that is a 65% decrease.

$$\rho_b^{SK} = 149.37 - \frac{147.61}{1 + e^{0.093 \cdot (T - 98.85C)}}, \quad \rho_f^{SK} = 0.005 + \frac{2.205}{1 + e^{-0.334 \cdot (T + 25.59C)}}$$

Table M11 presents the parameters to model the SK channel.

| NAME                     | VALUE                    | ENCE                         |
|--------------------------|--------------------------|------------------------------|
| <b>SK channel</b>        |                          |                              |
| number of SK channels    | $N_{SK} = 15$            | 10–200 (Bock et al., 2019)   |
| SK conductance           | $\gamma_{SK} = 10$ pS    | (Maylie et al., 2004)        |
| SK reversal potential    | $E_{rev}^{SK} = -90$ mV  | (Griffith et al., 2016)      |
| SK half-activation       | $h_{SK} = 0.333$ $\mu$ M | (Griffith et al., 2016)      |
| SK half-activation slope | $\sigma = 6$             | 4 in (Griffith et al., 2016) |
| SK time constant         | $\tau_{SK} = 6.3$ ms     | (Griffith et al., 2016)      |

Table M11. SK channel parameters.

## Enzymes - CaM, CaN and CaMKII

### Markov chain

To model the enzymes dynamics, we adapted a monomeric CaM-CaMKII Markov chain from Chang et al. (2019) which builds over Pepke et al. (2010). Our adaptation incorporates a simplified CaN reaction which only binds to fully saturated CaM. That is, CaM bound to four calcium ions on N and C terminals (see Markov chain in the Figure M10). A consequence of the Pepke coarse-grained model is that calcium binds and unbinds simultaneously from the CaM terminals (N,C). We assumed no dephosphorylation reaction between CaMKII and CaN since Otmakhov et al. (2015) experimentally suggested that no known phosphatase affects CaMKII decay time which is probably caused only by CaM untrapping (Otmakhov et al., 2015). This was previously theorized by Michalski (2013)'s model, and it is reflected in Chang data (Chang et al., 2019, 2017). The structure of the corresponding Markov chain is shown in Figure M10.

Chang's data (Chang et al., 2019) provides a high-temporal resolution fluorescence measurements for CaMKII in the spines of rat's CA1 pyramidal neurons and advances the description of CaMKII self-phosphorylation (at room temperature). We modified Chang's model of CaMKII unbinding rates  $k_2, k_3, k_4, k_5$  to fit CaMKII dynamics at room/physiological temperature as shown by Chang et al. (2017) supplemental files. Previous modelling of CaMKII (Chang et al., 2019; Pepke et al., 2010) used a stereotyped waveform with no adaptation to model calcium. Our contribution to CaMKII modelling was to use calcium dynamics sensitive to the experimental conditions to reproduce CaMKII data, therefore, allowing us to capture physiological temperature measurements from Chang et al. (2017). Note that CaMKII dynamics has two time scales and we only capture the fastest one (after stimulation ceases, 60 s) and the relative amplitude of CaMKII between the different temperatures. The slowest one occurs at the end of the stimulus, close to the maximum (Figure M11A); this can be caused by the transient volume increase in the spine as measured by Chang et al. (2017).

Table M12 shows the concentration of the enzymes and Table M13 shows the parameters to model enzymes reactions in the Figure M10.

| NAME                         | VALUE                      | REFERENCE                             |
|------------------------------|----------------------------|---------------------------------------|
| <b>Enzyme concentrations</b> |                            |                                       |
| free CaM concentration       | $CaM_{con} = 30$ $\mu$ M   | (Kakiuchi et al., 1982)               |
| free KCaM concentration      | $mKCaM_{con} = 70$ $\mu$ M | (Feng et al., 2011; Lee et al., 2009) |
| free CaN concentration       | $mCaN_{con} = 20$ $\mu$ M  | 5–20 $\mu$ M (Roehrl et al., 2004)    |

Table M12. Concentration of each enzyme.

### Temperature effects on enzymatic-activity

We then included temperature factors in the coarse-grained model using Chang data (Chang et al., 2019), as shown in Figure M11. For CaMKII, we fitted the modified dissociation rates of the phosphorylation states  $k_2, k_3$  and  $k_5$  to match the data on relative amplitude and decay time using the following logistic function:

$$\rho_b^{CaMKII} = 162.171 - \frac{161.426}{1 + e^{0.511(T-45.475^\circ C)}}.$$

For CaN, we fit the Fujii et al. (2013)' data at 25°C as seen in Figure M12A. However, since CaN-CaM dissociation rates at physiological temperatures were not found, we set the temperature factor to CaN that fits the outcomes of the protocols we proposed to reproduce. A reference value from the CaN-AKAP79 complex (Li et al., 2012) showed

a  $Q_{10} = 4.46 = (2.19 \text{ s}^{-1} / 9.78 \text{ s}^{-1})$  which is nearly the temperature factor used in our model for CaM. Therefore, both the association and dissociation rates are modified using the following logistic functions:

$$\rho_f^{CaN} = 2.503 - \frac{0.304}{1 + e^{1.048(T - 30.668^\circ\text{C})}}$$

$$\rho_b^{CaN} = 0.729 + \frac{3.225}{1 + e^{-0.330(T - 36.279^\circ\text{C})}}$$

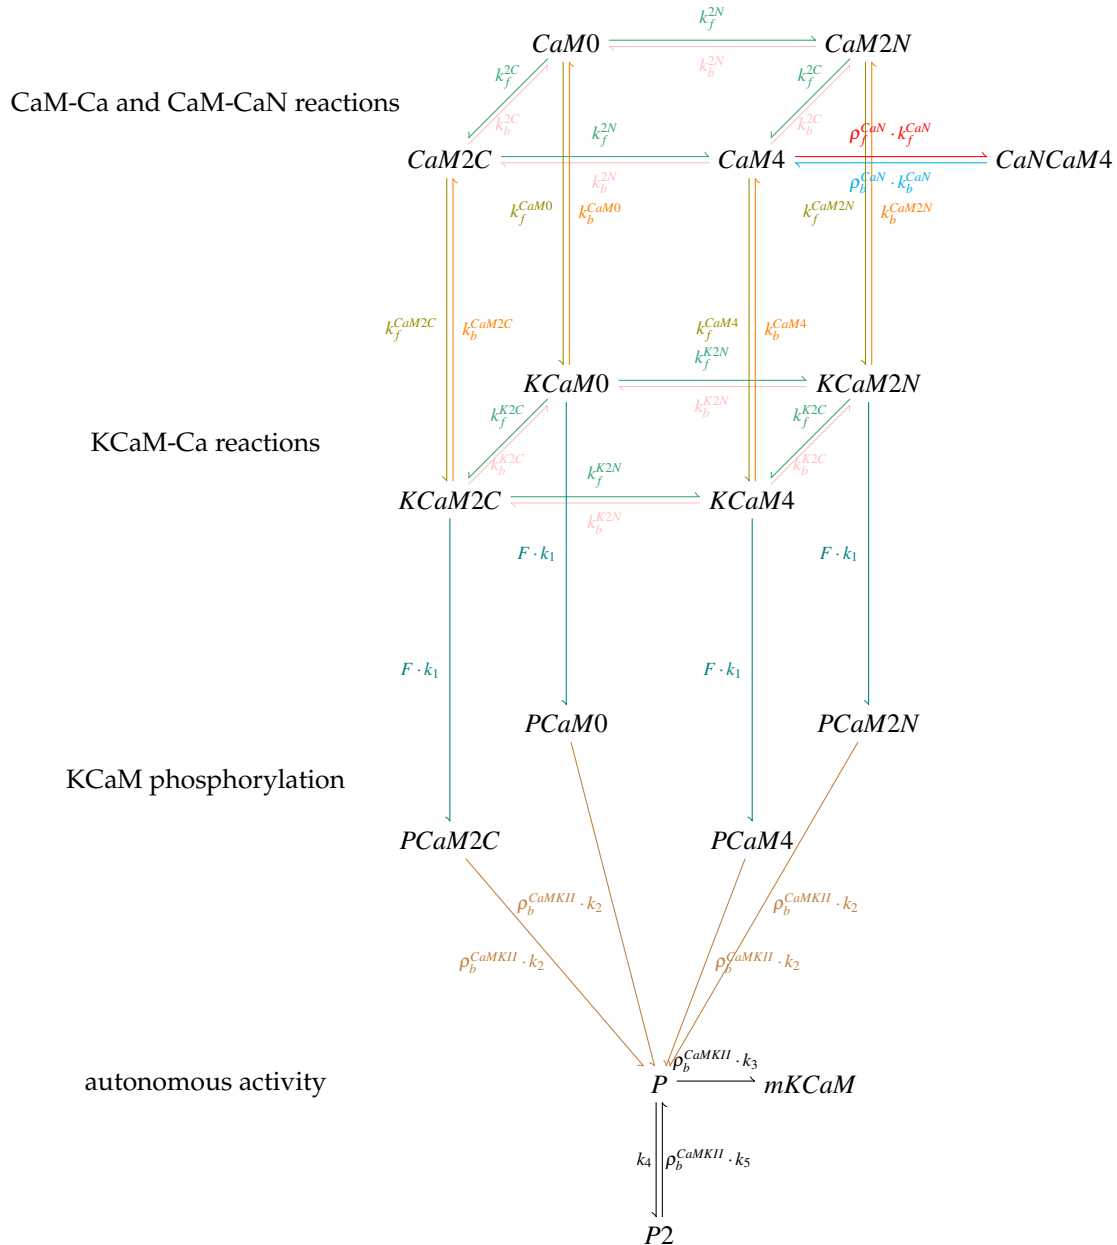

Figure M10. Coarse-grained model of CaM, CaMKII and CaN adapted from Chang et al. (2019) and Pepke et al. (2010) The reaction description matches with the color: Releases 2Ca, consumes 2Ca, consumes mKCaM, releases mKCaM, releases CaM2C, CaM2N, CaM0, CaM2N, releases mCaN, consumes mCaN, phosphorylate K units to P units, phosphorylated states and dephosphorylation.



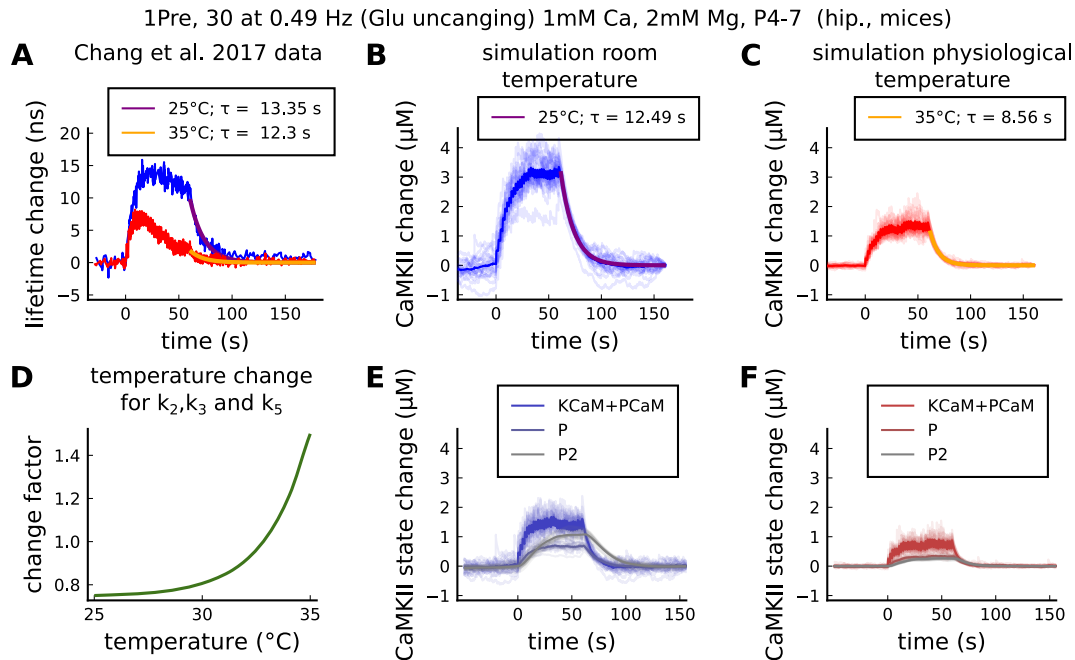

**Figure M11. CaMKII temperature changes in our model caused by 1Pre, 30 at 0.49 Hz with Glutamate uncaging (no failures allowed), 1mM Ca, 2mM Mg, P4-7 organotypic slices from mice hippocampus.** **A**) CaMKII fluorescent probe lifetime change measured by Chang et al. (2017) for 25°C (blue) and 35°C (red) (Chang et al., 2017). The decay time ( $\tau$ ) was estimated by fitting the decay after the stimulation (30 pulses at 0.49Hz) using a single exponential decay,  $y = a \cdot e^{-t/b}$ ;  $\tau = 1/b$ . **B**) Simulation of the CaMKII concentration change (with respect to the baseline) at 25°C in response to same protocol applied in the panel A. The simulations on the panels B, C, E and F show the mean of 20 samples. **C**) Same as in panel B but for 35°C. **D**) Estimated temperature change factor for the dissociation rates  $k_2, k_3$  and  $k_5$  in the Markov chain at the Figure M10. **E**) Change in the concentration of the CaMKII states (25°C) which are summed to compose CaMKII change in the panel B. **F**) Same as in panel E for 35°C with reference to the panel C.

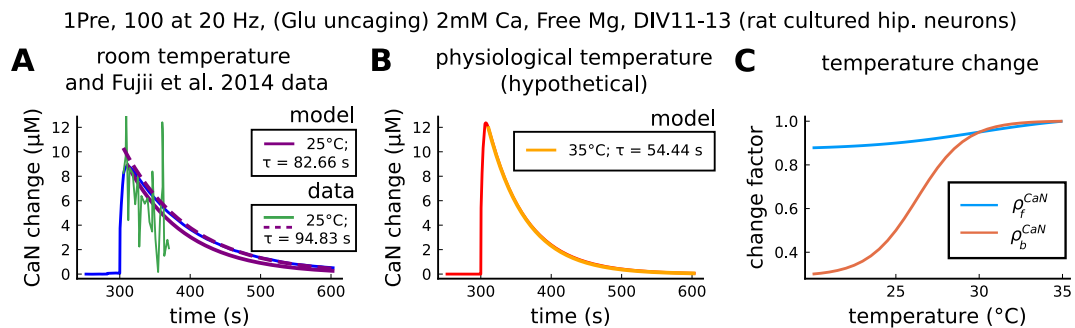

**Figure M12. CaN temperature changes in our model caused by 1Pre, 100 at 20 Hz with Glutamate uncaging (no failures allowed), 2mM Ca, Free Mg, 11-13 days in vitro.** **A**) Simulated CaN change (blue solid line) in response to the same stimuli of the CaN measurement from Fujii et al. (2013) RY-CaN fluorescent probe (green solid line). The decay time ( $\tau$ ) estimated from data ( $y = a \cdot e^{-t/b}$ ) is 94.83 s (dashed purple line) and for our model (solid purple line) is 82.66 s. **B**) Simulated CaN change for physiological temperature with decay time 54.44 s. Due to the lack of data, CaN kinetic change was set to fit plasticity on the protocols use in this work. **C**) Temperature change,  $\rho_f^{CaN}$  and  $\rho_b^{CaN}$ , applied to CaN association and dissociation rates. Our dissociation rate becomes  $0.006 \text{ s}^{-1}$  for 22°C (same temperature as in Quintana et al. (2005)),  $0.0012 \text{ s}^{-1}$ , at the same temperature the association rate becomes  $9.45 \cdot 10^6 \text{ M}^{-1} \text{ s}^{-1}$  ( $46 \cdot 10^6 \text{ M}^{-1} \text{ s}^{-1}$  in Quintana et al. (2005)).

| REACTIONS                                                   | VALUE                                                                                    | REFERENCE                                                         |
|-------------------------------------------------------------|------------------------------------------------------------------------------------------|-------------------------------------------------------------------|
| <b>Coarse-grained model, CaM-Ca reactions</b>               |                                                                                          |                                                                   |
| CaM0 + 2Ca $\Rightarrow$ CaM2C                              | $k_f^{2C} = \text{adapt}(k_{on}^{1C}, k_{on}^{2C}, k_{off}^{1C}, k_{off}^{2C}, Ca)$      | (Pepke et al., 2010)                                              |
| CaM2N + 2Ca $\Rightarrow$ CaM4                              | $k_f^{2N} = \text{adapt}(k_{on}^{1N}, k_{on}^{2N}, k_{off}^{1N}, k_{off}^{2N}, Ca)$      | (Pepke et al., 2010)                                              |
| CaM0 + 2Ca $\Rightarrow$ CaM2N                              |                                                                                          |                                                                   |
| CaM2C + 2Ca $\Rightarrow$ CaM4                              |                                                                                          |                                                                   |
| CaM2C $\Rightarrow$ CaM0 + 2Ca                              | $k_b^{2C} = \text{adapt}(k_{off}^{1C}, k_{off}^{2C}, k_{on}^{1C}, k_{on}^{2C}, Ca)$      | (Pepke et al., 2010)                                              |
| CaM4 $\Rightarrow$ CaM2N + 2Ca                              |                                                                                          |                                                                   |
| CaM2N $\Rightarrow$ CaM0 + 2Ca                              | $k_b^{2N} = \text{adapt}(k_{off}^{1N}, k_{off}^{2N}, k_{on}^{1N}, k_{on}^{2N}, Ca)$      | (Pepke et al., 2010)                                              |
| CaM4 $\Rightarrow$ CaM2C + 2Ca                              |                                                                                          |                                                                   |
|                                                             | $k_{on}^{1C} = 5 \cdot 10^6 M^{-1} s^{-1}$                                               | 1.2 to $9.6 \cdot 10^6 M^{-1} s^{-1}$ (Pepke et al., 2010)        |
|                                                             | $k_{on}^{2C} = 10 \cdot 10^6 M^{-1} s^{-1}$                                              | 5 to $35 \cdot 10^6 M^{-1} s^{-1}$ (Pepke et al., 2010)           |
|                                                             | $k_{on}^{1N} = 100 \cdot 10^6 M^{-1} s^{-1}$                                             | 25 to $260 \cdot 10^6 M^{-1} s^{-1}$ (Pepke et al., 2010)         |
|                                                             | $k_{on}^{2N} = 200 \cdot 10^6 M^{-1} s^{-1}$                                             | 50 to $300 \cdot 10^6 M^{-1} s^{-1}$ (Pepke et al., 2010)         |
|                                                             | $k_{off}^{1C} = 50 s^{-1}$                                                               | 10 to $70 s^{-1}$ (Pepke et al., 2010)                            |
|                                                             | $k_{off}^{2C} = 10 s^{-1}$                                                               | 8.5 to $10 s^{-1}$ (Pepke et al., 2010)                           |
|                                                             | $k_{off}^{1N} = 2000 s^{-1}$                                                             | $1 \cdot 10^3$ to $4 \cdot 10^3 s^{-1}$ (Pepke et al., 2010)      |
|                                                             | $k_{off}^{2N} = 500 s^{-1}$                                                              | $0.5 \cdot 10^3$ to $> 1 \cdot 10^3 s^{-1}$ (Pepke et al., 2010)  |
| <b>Coarse-grained model, KCaM-Ca reactions</b>              |                                                                                          |                                                                   |
| KCaM0 + 2Ca $\Rightarrow$ KCaM2C                            | $k_f^{K2C} = \text{adapt}(k_{on}^{K1C}, k_{on}^{K2C}, k_{off}^{K1C}, k_{off}^{K2C}, Ca)$ | (Pepke et al., 2010)                                              |
| KCaM2N + 2Ca $\Rightarrow$ KCaM4                            |                                                                                          |                                                                   |
| KCaM0 + 2Ca $\Rightarrow$ KCaM2N                            | $k_f^{K2N} = \text{adapt}(k_{on}^{K1N}, k_{on}^{K2N}, k_{off}^{K1N}, k_{off}^{K2N}, Ca)$ | (Pepke et al., 2010)                                              |
| KCaM2C + 2Ca $\Rightarrow$ KCaM4                            |                                                                                          |                                                                   |
| KCaM2C $\Rightarrow$ KCaM0 + 2Ca                            | $k_b^{K2C} = \text{adapt}(k_{off}^{K1C}, k_{off}^{K2C}, k_{on}^{K1C}, k_{on}^{K2C}, Ca)$ | (Pepke et al., 2010)                                              |
| KCaM4 $\Rightarrow$ KCaM2N + 2Ca                            |                                                                                          |                                                                   |
| KCaM2N $\Rightarrow$ KCaM0 + 2Ca                            | $k_b^{K2N} = \text{adapt}(k_{off}^{K1N}, k_{off}^{K2N}, k_{on}^{K1N}, k_{on}^{K2N}, Ca)$ | (Pepke et al., 2010)                                              |
| KCaM4 $\Rightarrow$ KCaM2C + 2Ca                            |                                                                                          |                                                                   |
|                                                             | $k_{on}^{K1C} = 44 \cdot 10^6 M^{-1} s^{-1}$                                             | (Pepke et al., 2010)                                              |
|                                                             | $k_{on}^{K2C} = 44 \cdot 10^6 M^{-1} s^{-1}$                                             | (Pepke et al., 2010)                                              |
|                                                             | $k_{on}^{K1N} = 76 \cdot 10^6 M^{-1} s^{-1}$                                             | (Pepke et al., 2010)                                              |
|                                                             | $k_{on}^{K2N} = 76 \cdot 10^6 M^{-1} s^{-1}$                                             | (Pepke et al., 2010)                                              |
|                                                             | $k_{off}^{K1C} = 33 s^{-1}$                                                              | (Pepke et al., 2010)                                              |
|                                                             | $k_{off}^{K2C} = 0.8 s^{-1}$                                                             | 0.49 to $4.9 s^{-1}$ (Pepke et al., 2010)                         |
|                                                             | $k_{off}^{K1N} = 300 s^{-1}$                                                             | (Pepke et al., 2010)                                              |
|                                                             | $k_{off}^{K2N} = 20 s^{-1}$                                                              | 6 to $60 s^{-1}$ (Pepke et al., 2010)                             |
| <b>Coarse-grained model, CaM-mKCaM reactions</b>            |                                                                                          |                                                                   |
| CaM0 + mKCaM $\Rightarrow$ mKCaM0                           | $k_f^{CaM0} = 3.8 \cdot 10^3 M^{-1} s^{-1}$                                              | (Pepke et al., 2010)                                              |
| CaM2C + mKCaM $\Rightarrow$ mKCaM2C                         | $k_f^{CaM2C} = 0.92 \cdot 10^6 M^{-1} s^{-1}$                                            | (Pepke et al., 2010)                                              |
| CaM2N + mKCaM $\Rightarrow$ mKCaM2N                         | $k_f^{CaM2N} = 0.12 \cdot 10^6 M^{-1} s^{-1}$                                            | (Pepke et al., 2010)                                              |
| CaM4 + mKCaM $\Rightarrow$ mKCaM4                           | $k_f^{CaM4} = 30 \cdot 10^6 M^{-1} s^{-1}$                                               | 14 to $60 \cdot 10^6 M^{-1} s^{-1}$ (Pepke et al., 2010)          |
| mKCaM0 $\Rightarrow$ CaM0 + mKCaM                           | $k_b^{CaM0} = 5.5 s^{-1}$                                                                | (Pepke et al., 2010)                                              |
| mKCaM2C $\Rightarrow$ CaM2C + mKCaM                         | $k_b^{CaM2C} = 6.8 s^{-1}$                                                               | (Pepke et al., 2010)                                              |
| mKCaM2N $\Rightarrow$ CaM2N + mKCaM                         | $k_b^{CaM2N} = 1.7 s^{-1}$                                                               | (Pepke et al., 2010)                                              |
| mKCaM4 $\Rightarrow$ CaM0 + mKCaM                           | $k_b^{CaM4} = 1.5 s^{-1}$                                                                | 1.1 to $2.3 s^{-1}$ (Pepke et al., 2010)                          |
| <b>Coarse-grained model, self-phosphorylation reactions</b> |                                                                                          |                                                                   |
| KCaM0 $\Rightarrow$ PCaM0                                   |                                                                                          |                                                                   |
| KCaM2N $\Rightarrow$ PCaM2N                                 |                                                                                          |                                                                   |
| KCaM2C $\Rightarrow$ PCaM2C                                 | $k_1 = 12.6 s^{-1}$                                                                      | (Chang et al., 2019)                                              |
| KCaM4 $\Rightarrow$ PCaM4                                   |                                                                                          |                                                                   |
| Fraction of activated CaMKII                                | $F = CaMKII/mKCaM_{con}$                                                                 | see Equation (17) (Chang et al., 2019)                            |
| PCaM0 $\Rightarrow$ P+CaM0                                  |                                                                                          |                                                                   |
| PCaM2N $\Rightarrow$ P+CaM2N                                |                                                                                          |                                                                   |
| PCaM2C $\Rightarrow$ P+CaM2C                                | $k_2 = 0.33^{-1}$                                                                        | $0.33 s^{-1}$ ; adapted from (Chang et al., 2019)                 |
| PCaM4 $\Rightarrow$ P+CaM4                                  |                                                                                          |                                                                   |
| P $\Rightarrow$ mKCaM                                       | $k_3 = 4 \cdot 0.17 s^{-1}$                                                              | $0.17 s^{-1}$ adapted from (Chang et al., 2019)                   |
| P $\Rightarrow$ P2                                          | $k_4 = 4 \cdot 0.041 s^{-1}$                                                             | $0.041 s^{-1}$ adapted from (Chang et al., 2019)                  |
| P2 $\Rightarrow$ P                                          | $k_5 = 8 \cdot 0.017 s^{-1}$                                                             | $0.017 s^{-1}$ adapted from (Chang et al., 2019)                  |
| <b>Calcineurin model, CaM-CaM4 reactions</b>                |                                                                                          |                                                                   |
| CaM4 + mCaN $\Rightarrow$ mCaNCaM4                          | $k_f^{CaN} = 10.75 \cdot 10^6 M^{-1} s^{-1}$                                             | $46 \cdot 10^6 M^{-1} s^{-1}$ (Quintana et al., 2005)             |
| mCaNCaM4 $\Rightarrow$ CaM4 + mCaN                          | $k_b^{CaN} = 0.02 s^{-1}$                                                                | $0.0012 s^{-1}$ (Quintana et al., 2005)<br>see temperature factor |

**Table M13.** Parameters for the coarse-grained model published in Pepke et al. (2010) and adapted by Chang et al. (2019) and this work. Pepke et al. (2010) rate adaptation for the coarse-grained model  $\text{adapt}(a, b, c, d, Ca) = \frac{ab}{c+dCa}$ .

## Readout

We describe the readout mechanism which provides the plasticity event which takes place in the synapse. First, we define the following variables which are representative of "active CaMKII" and "active CaN":

Active CaN

$$CaN = CaN4$$

Active CaMKII

$$KCaM = KCaM0 + KCaM2C + KCaM2N + KCaM4$$

$$PCaM = PCaM0 + PCaM2C + PCaM2N + PCaM4$$

$$CaMKII = KCaM + PCaM + P + P2. \quad (17)$$

It is known that the calcium entry initiates a cascade of events that ultimately leads to short and long term plasticity changes. Specific concentrations of CaMKII and CaN trigger activation functions  $act_D$  and  $act_P$  when they belong to one of the two polygonal regions (P and D), termed plasticity regions:

$$act_D = a_D \cdot \mathbb{1}_D - b_D \cdot (1 - \mathbb{1}_D) \cdot act_D$$

$$act_P = a_P \cdot \mathbb{1}_P - b_P \cdot (1 - \mathbb{1}_P) \cdot act_P.$$

To Specify the LTP/LTD rates, termed  $D_{rate}$  and  $P_{rate}$ , we use the activation functions,  $act_D$  and  $act_P$ , as follows:

$$P_{rate}(act_P) = t_P^{-1} \frac{act_P^{h_P}}{act_P^{h_P} + K_P^{h_P}}$$

$$D_{rate}(act_D) = t_D^{-1} \frac{act_D^{h_D}}{act_D^{h_D} + K_D^{h_D}}.$$

The Markov plasticity chain (see Figure M13) starts with initial conditions NC=100, LTD=0 and LTP=0. Figure M14 shows how the readout works to predict plasticity for a single orbit. Table M14 shows the parameters to define the polygons of the plasticity regions (see Figure M14)B.

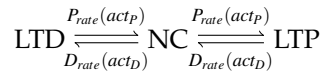

Figure M13. Plasticity Markov Chain.

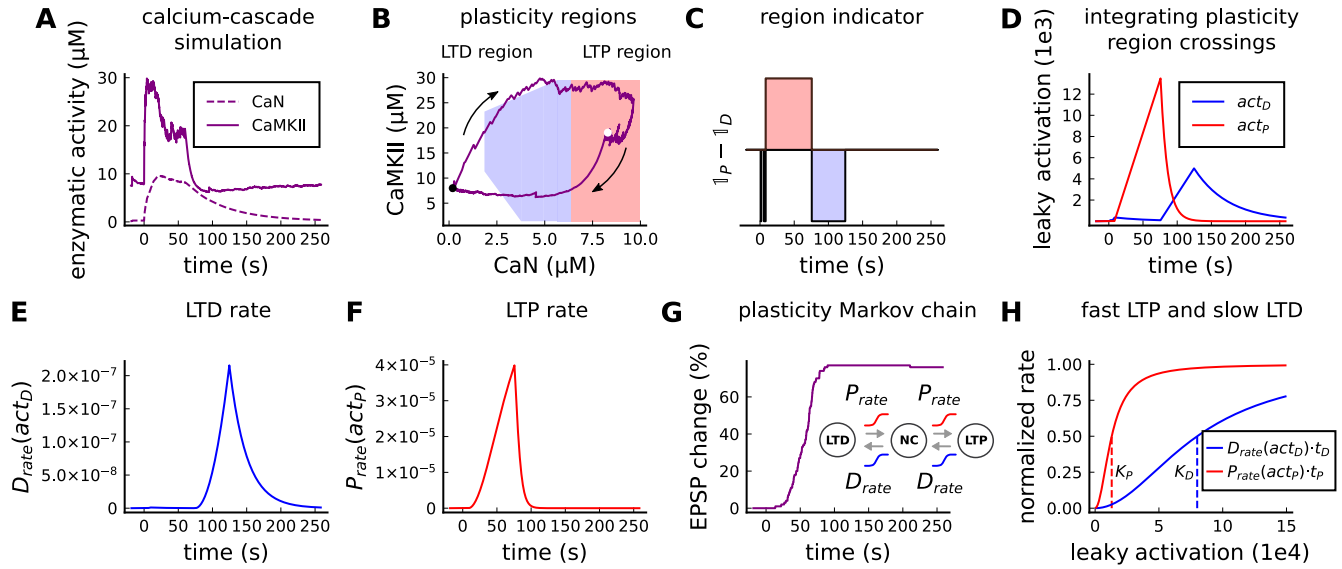

**Figure M14. Plasticity readout for the protocol 1Pre2Post10, 300 at 5Hz, from Tigaret et al. (2016).** A) CaMKII and CaN activity in response to protocol 1Pre2Post10. B) Enzymatic joint activity in the 2D plane showing LTD and LTP's plasticity regions. The black point marks the beginning of the stimulation, and the white point shows the end of the stimulation after 60 s. C) Region indicator illustrating how the joint activity crosses the LTP and the LTD regions. D) The leaky activation functions are used respectively as input to the LTP and LTD rates. The activation function has a constant rise when the joint-activity is inside the region, and exponential decay when it is out. E) The LTD rate in response to the leaky activation function,  $act_D$ , in panel D. Note that this rate profile occurs after the stimulation is finished (60 s). The joint-activity is returning to the resting concentration in panel A. F) The LTP rate in response to the leaky activation function,  $act_P$ , in panel D. G) Outcome of the plasticity Markov chain in response to the LTD and LTP rates. The EPSP change (%) is estimated by the difference between the number of processes in the states LTP and LTD,  $LTP - LTD$ . H) Normalized LTP and LTD rates (multiplied to their respective time constant,  $t_D$ ,  $t_P$ ) sigmoids. The dashed line represents the half-activation curve for the LTP and LTD rates. Note in panel D that the leaky activation function reaches the half-activation  $K_P = 1.3e4$ .

| NAME                                                      | VALUE                                                     | REFERENCE                                 |
|-----------------------------------------------------------|-----------------------------------------------------------|-------------------------------------------|
| <b>Leaking variable (a.u.)</b>                            |                                                           |                                           |
| rise constant inside the LTD region                       | $a_D = 0.1 \text{ a.u.} \cdot \text{ms}^{-1}$             | fitted to cover all protocols in Table M1 |
| rise constant inside the LTP region                       | $a_P = 0.2 \text{ a.u.} \cdot \text{ms}^{-1}$             | fitted to cover all protocols in Table M1 |
| decay constant outside the LTD region                     | $b_D = 2 \cdot 10^{-5} \text{ a.u.} \cdot \text{ms}^{-1}$ | fitted to cover all protocols in Table M1 |
| decay constant outside the LTP region                     | $b_P = 1 \cdot 10^{-4} \text{ a.u.} \cdot \text{ms}^{-1}$ | fitted to cover all protocols in Table M1 |
| <b>Plasticity Markov chain</b>                            |                                                           |                                           |
| LTD rate time constant                                    | $t_D = 1.8 \cdot 10^4 \text{ ms}$                         | fitted to cover all protocols in Table M1 |
| LTP rate time constant                                    | $t_P = 1.3 \cdot 10^4 \text{ ms}$                         | fitted to cover all protocols in Table M1 |
| hill coefficient LTP                                      | $h_P = 2$                                                 | fitted to cover all protocols in Table M1 |
| hill coefficient LTD                                      | $h_D = 2$                                                 | fitted to cover all protocols in Table M1 |
| half occupation LTP                                       | $K_P = 1.3 \cdot 10^4 \text{ a.u.}$                       | fitted to cover all protocols in Table M1 |
| half occupation LTD                                       | $K_D = 8 \cdot 10^4 \text{ a.u.}$                         | fitted to cover all protocols in Table M1 |
| <b>Plasticity region (edges of the polygons)</b>          |                                                           |                                           |
| LTP region (CaMKII) - top border                          | 29.5                                                      | fitted to cover all protocols in Table M1 |
| LTP region (CaMKII) - bottom border                       | 1.4                                                       | fitted to cover all protocols in Table M1 |
| LTP region (CaN) - right border                           | 10.                                                       | fitted to cover all protocols in Table M1 |
| LTP region (CaN) - left border                            | 6.35                                                      | fitted to cover all protocols in Table M1 |
| LTD region (CaMKII) - top border                          | 29.5                                                      | fitted to cover all protocols in Table M1 |
| LTD region (CaMKII) - bottom border                       | 1.4                                                       | fitted to cover all protocols in Table M1 |
| LTD region (CaN) - right border                           | 1.85                                                      | fitted to cover all protocols in Table M1 |
| LTD region (CaN) - left border                            | 6.35                                                      | fitted to cover all protocols in Table M1 |
| LTD region - upper diagonal (line equation in the 2D map) | $CaMKII = +1.64 \cdot CaN + 20.20$                        | fitted to cover all protocols in Table M1 |
| LTD region - lower diagonal (line equation in the 2D map) | $CaMKII = -5.18 \cdot CaN + 20.91$                        | fitted to cover all protocols in Table M1 |

Table M14. Parameters to define the plasticity readout.

## Supplementary files

Supplemental files present some experiments and predictions extending the notion of parameter sensitivity. Also, they show the effect of modifications in the experimental parameters in Table M1. For instance, Figure S1 show variations on Tigaret et al. (2016)'s experiment.

### Varying experimental parameters in Tigaret et al. 2016 - 1Pre2Post(delay)

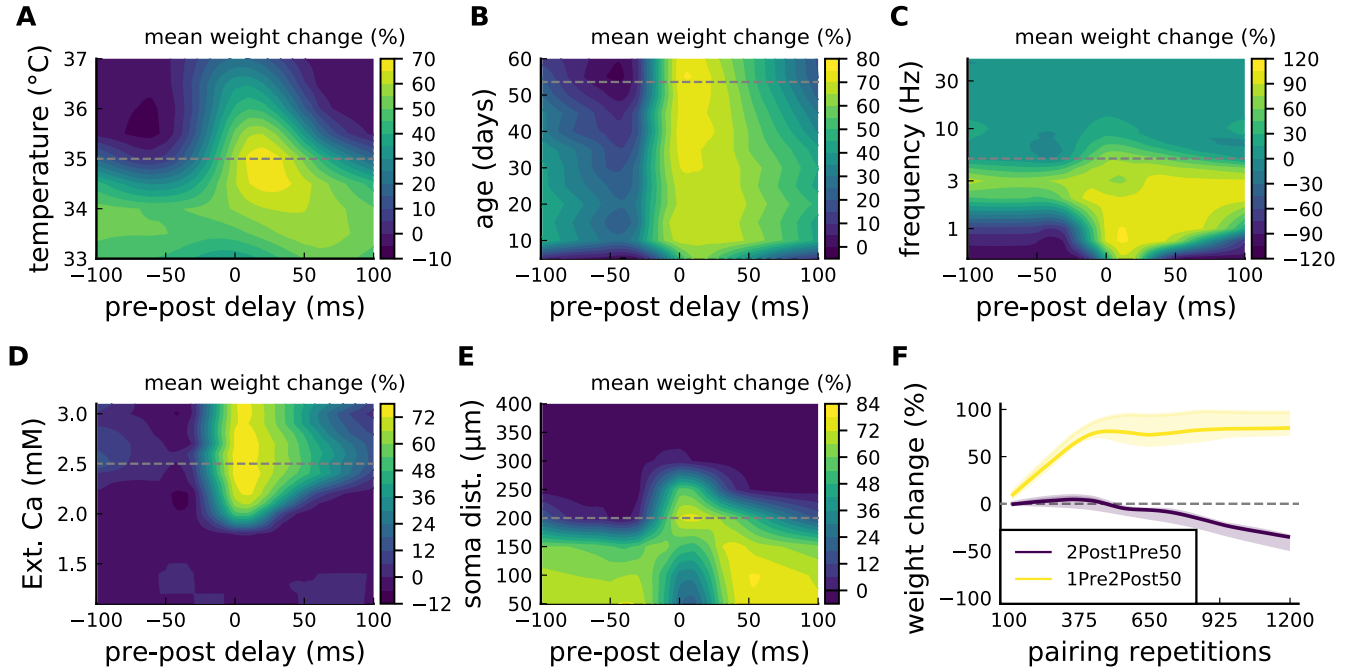

**Figure S1. Varying Tigaret et al. (2016) experimental parameters. Related to Figure 3.** **A)** Mean synaptic weight change for 1Pre2Post(delay) varying the temperature, original temperature is 35°C (dashed grey line). **B)** Mean synaptic weight change for 1Pre2Post(delay) varying the age, original age is P50-55 (dashed grey line). **C)** Mean synaptic weight change for 1Pre2Post(delay) varying the frequency, original frequency is 5 Hz (dashed grey line). **D)** Mean synaptic weight change for 1Pre2Post(delay) varying the  $[Ca^{2+}]_o$ , original  $[Ca^{2+}]_o = 2.5$  mM (dashed grey line). **E)** Mean synaptic weight change for 1Pre2Post(delay) varying the distance from the soma, original distance is 200 µm (dashed grey line). A similar trend in distal spines was previously found in Ebner et al. (2019). **F)** Mean synaptic weight change of 1Pre2Post50 and 2Post1Pre50 when number of pulses increases or decreases. Note the similarity with Mizuno et al. (2001) in Figure S4C.

Figure S2 shows variations of Dudek and Bear (1992) parameters for  $[Ca^{2+}]_o$ ,  $[Mg^{2+}]_o$ , temperature and dendritic spine distance from the soma. Also, it shows the Poisson spike train protocol (as in Figure 7G and H) for temperature and age parameters obtained from an estimation of the body temperature regulation during development (or thermoregulation maturation, also called maturation of temperature homeostasis, estimated in Figure S5G).

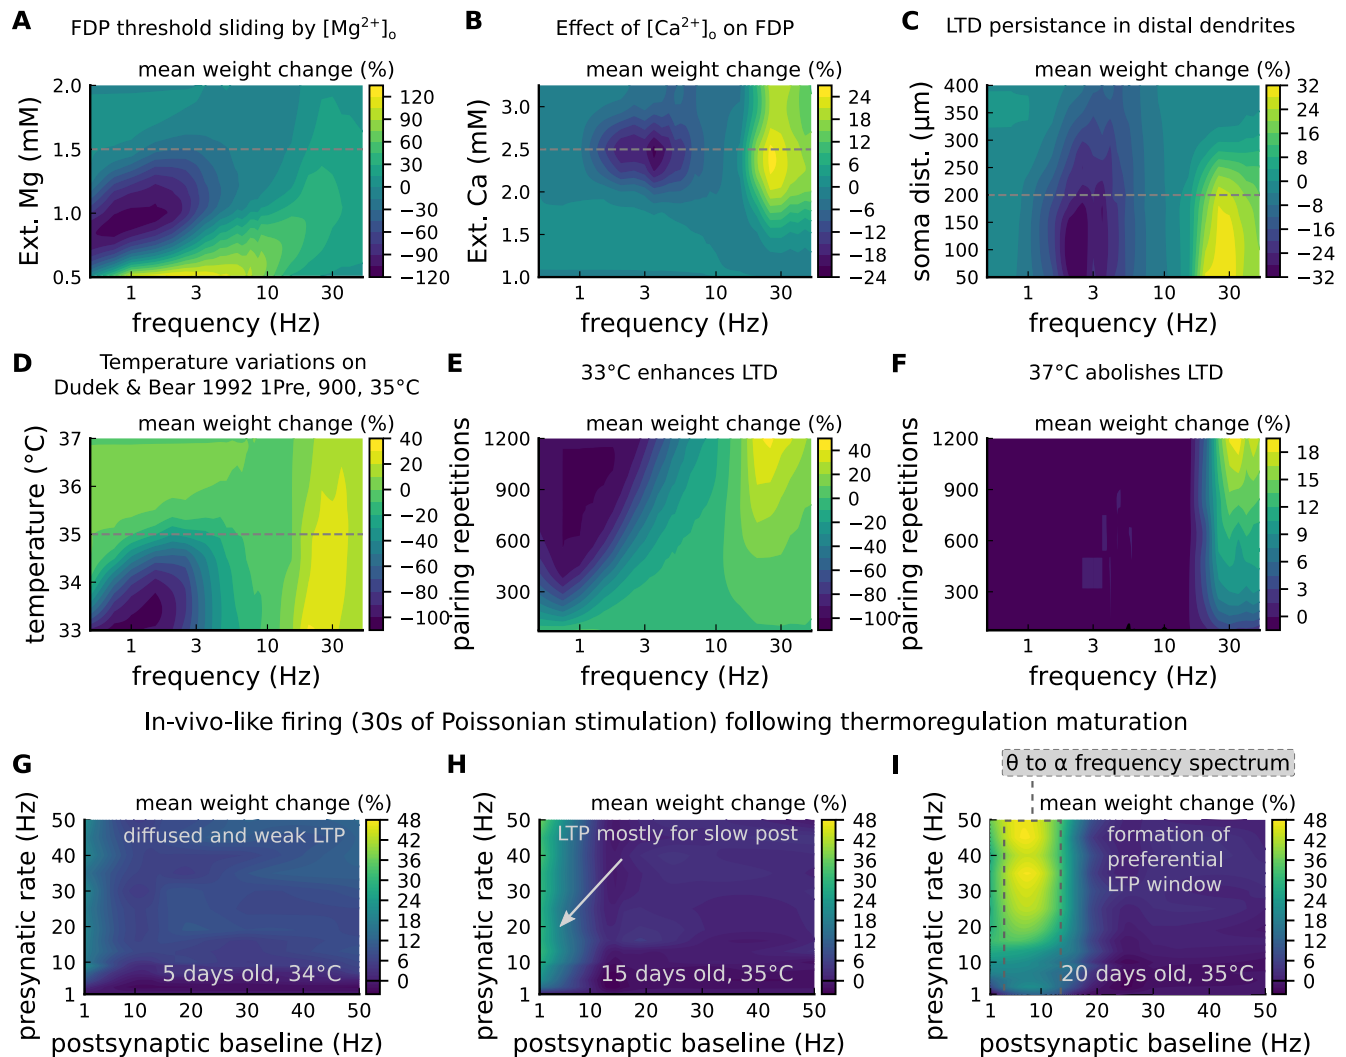

**Figure S2. Varying experimental parameters in (Dudek and Bear, 1992) and Poisson spike train during development. Related to Figure 4 and 7 .** A) Mean synaptic weight change for the FDP experiment varying the  $[Mg^{2+}]_o$ , original  $[Mg^{2+}]_o = 1.5$  mM (dashed grey line). B) Mean synaptic weight change for the FDP experiment varying the  $[Ca^{2+}]_o$ , original  $[Ca^{2+}]_o = 2.5$  mM (dashed grey line). C) Mean synaptic weight change for the FDP experiment varying the distant from the soma, original 200  $\mu m$  (dashed grey line). Changing the distance from the soma modifies how fast BaPs evoked by EPSP will attenuate. Note that LTD is prevalent for a spine situated far from the soma. This could justify why spines distant from the soma are smaller in size since distance correlates with synaptic weight. D) Mean synaptic weight change for the FDP experiment varying the temperature, original temperature 35°C (dashed grey line). E) Mean synaptic weight change for the FDP experiment varying the pairing repetitions at 33°C showing how LTD is enhanced. F) Mean synaptic weight change for the FDP experiment varying the pairing repetitions at 37°C showing how LTD is abolished. G) Mean synaptic weight change for pre and postsynaptic Poisson spike train during 30 s for P5 and 34°C. The panel shows that there is weak and diffused LTP. H) Mean synaptic weight change for pre and postsynaptic Poisson spike train during 30 s for P15 and 35°C. The panel shows that there is a start of LTP window forming for slow postsynaptic rates (<1 Hz). I) Mean synaptic weight change for pre and postsynaptic Poisson spike train during 30 s for P20 and 35°C. The panel shows that a window forms around 10 Hz postsynaptic rate similar to what is shown by Graupner et al. (2016) and in Figure 7H.

Figure S3 expands the presynaptic burst strategy hypothesized to recover the LTD in adult slices (Figure 5C) for 900 pairing repetitions. Also, Figure S3 tries to isolate the contribution of each age-dependent mechanism (NMDAR, GABA<sub>A</sub>, BaP efficiency switches) for 3 and 5 Hz predictions in Dudek and Bear (1993) experiment. To this we fixed each of the three mechanisms coding for age in our model at P5 and P50, to observe how they shape the plasticity. Note the experiment in Figure S4D-I is only to theoretically show how each age mechanism contributes to plasticity in Figure 5. Also we compare predictions of between different STDP experiments across age.

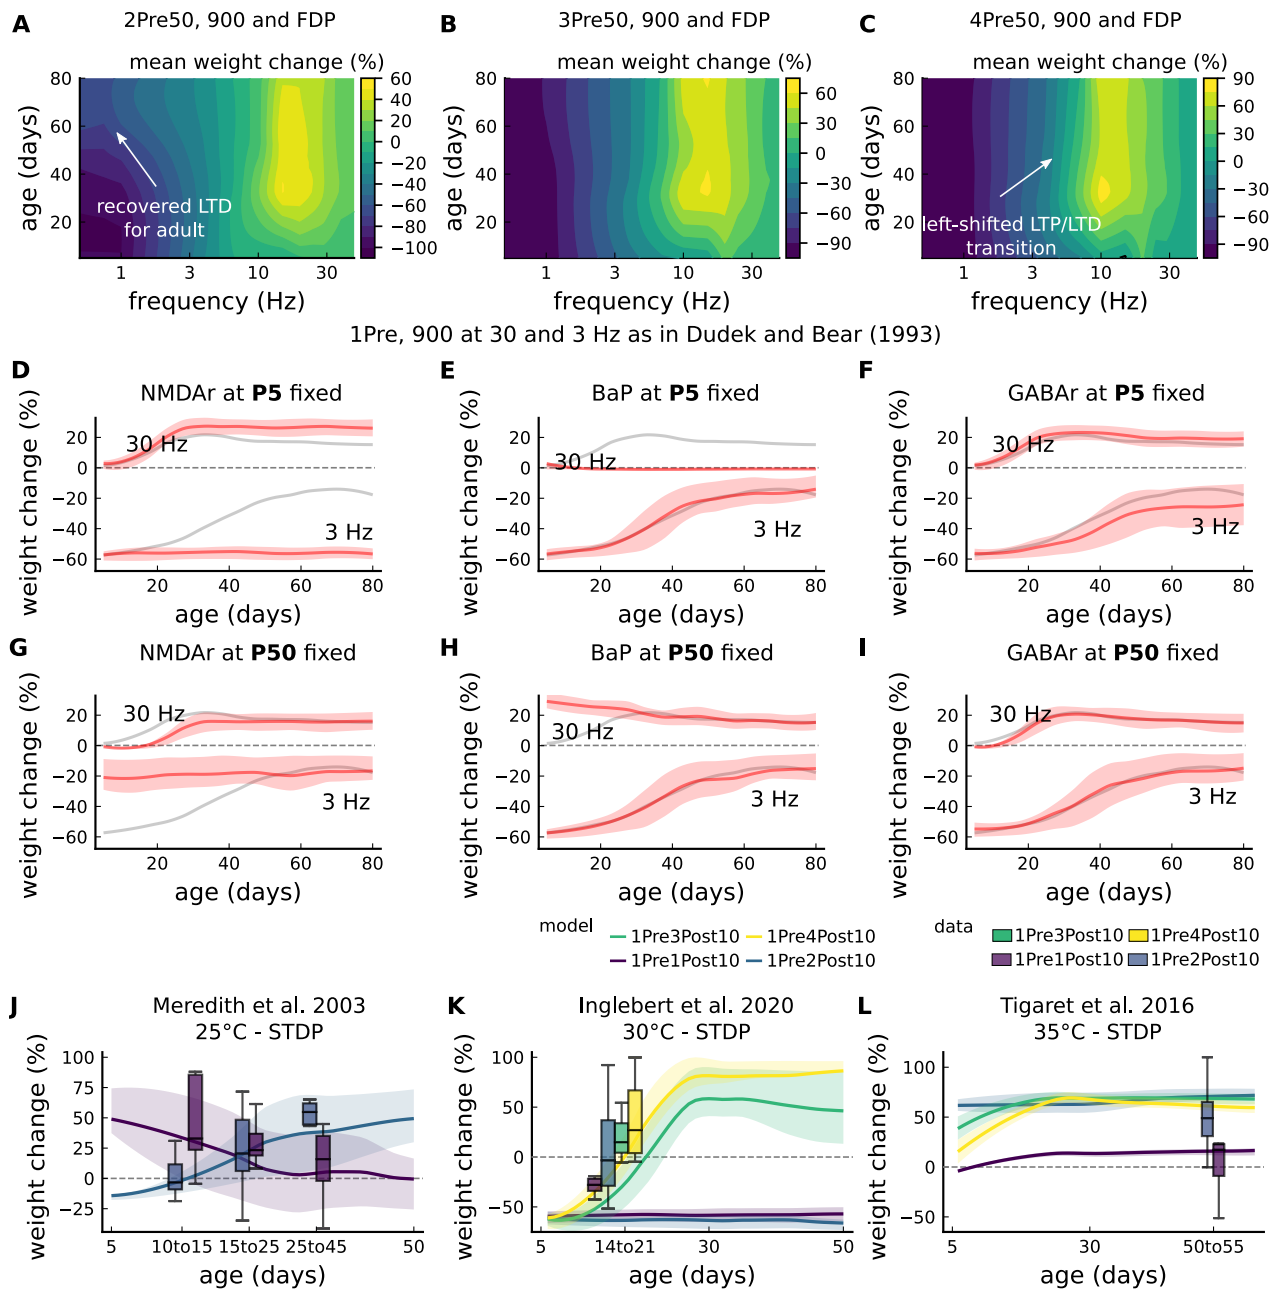

**Figure S3. Duplets, triplets and quadruplets for FDP, perturbing developmental-mechanisms for LFS and HFS in (Dudek and Bear, 1993), and age-related changes in STDP experiments (Inglebert et al., 2020; Tigaret et al., 2016; Meredith et al., 2003). Related to Figure 3 and 5.** **A)** Mean synaptic weight change (%) for the duplet-FDP (2Pre50) experiment varying age. The panel shows showing that not only LTD is enhanced but also LTP. **B)** Mean synaptic weight change (%) for the triplet-FDP (3Pre50) experiment varying age. The panel shows that LTD magnitude further enhanced for adult rats and that a leftward shift of the LTD-LTP transition. **C)** Mean synaptic weight change (%) for the quadruplet-FDP (4Pre50) experiment varying age. The panel shows a further leftward shift on the LTD-LTP transition (compared to 3Pre50). **D)** Mean synaptic weight change (%) for the 1 Pre 900 at 30 and 3 Hz with Dudek and Bear (1993). The panel shows the fixed NMDAR at P5 (more GluN2B) causing an increase of LTD magnitude and a slight increase of LTP magnitude for adult rats compared to baseline (grey solid line). **E)** Same experiment as panel D but fixing BaP maturation at P5 (higher BaP attenuation). LTP is abolished, but LTD is not affected. This is because AP induced by EPSP attenuate too fast for 30 Hz not able to produce enough depolarization to activate NMDAR Mg-unblock. **F)** Same experiment as panel D but fixing GABA maturation at P5 (excitatory GABA) what causes only slightly enhances LTD (3 Hz) for adult rats. **G)** Same experiment as panel D but fixing NMDAR at P50 (more GluN2A). LTD appears with decreased magnitude for young rats compared to baseline (grey solid line). **H)** Same experiment as panel D but fixing BaP maturation at P50 (less BaP attenuation). LTP is enhanced for young rats because the BaP pairing with the slow closing GluN2B produces more calcium influx. **I)** Same experiment as panel D but fixing GABA maturation at P50 (inhibitory GABA) which does not affect the FDP experiment. **J)** Mean synaptic weight change (%) for Meredith et al. (2003)'s single versus burst-STDP experiment for different ages. The data from Meredith (boxplots) were pooled by the age as shown in the x-axis. The solid line represents the mean, and the shaded ribbon the 2nd and 4th quantiles simulated by the model (same for panels A-F). **K)** Mean synaptic weight change (%) for Inglebert et al. (2020)'s STDP experiment in which the number of postsynaptic spikes increases. The x-axis marker from 14-21 indicates that only this interval was published without further specification. We use our model to estimate age related changes to Inglebert et al. (2020) protocols. Note that the model does not cover the 1Pre2Post10 properly (model predicts only outcomes near the first data quantile). Notice that single and burst STDP leads to LTD, meanwhile Meredith et al. (2003)'s to LTP or NC. **L)** Mean synaptic weight change (%) for Tigaret et al. (2016)'s STDP experiment which compares single versus burst STDP. The x-axis marker from 50-55 indicates that only a interval was published without further specification. We use our model to estimate age related changes to Tigaret et al. (2016) protocols. It is noticeable that each STDP experiment has a different development.

Figure S4 presents modifications of Inglebert et al. (2020)'s STDP experiment and the reproduction of Mizuno et al. (2001) data.

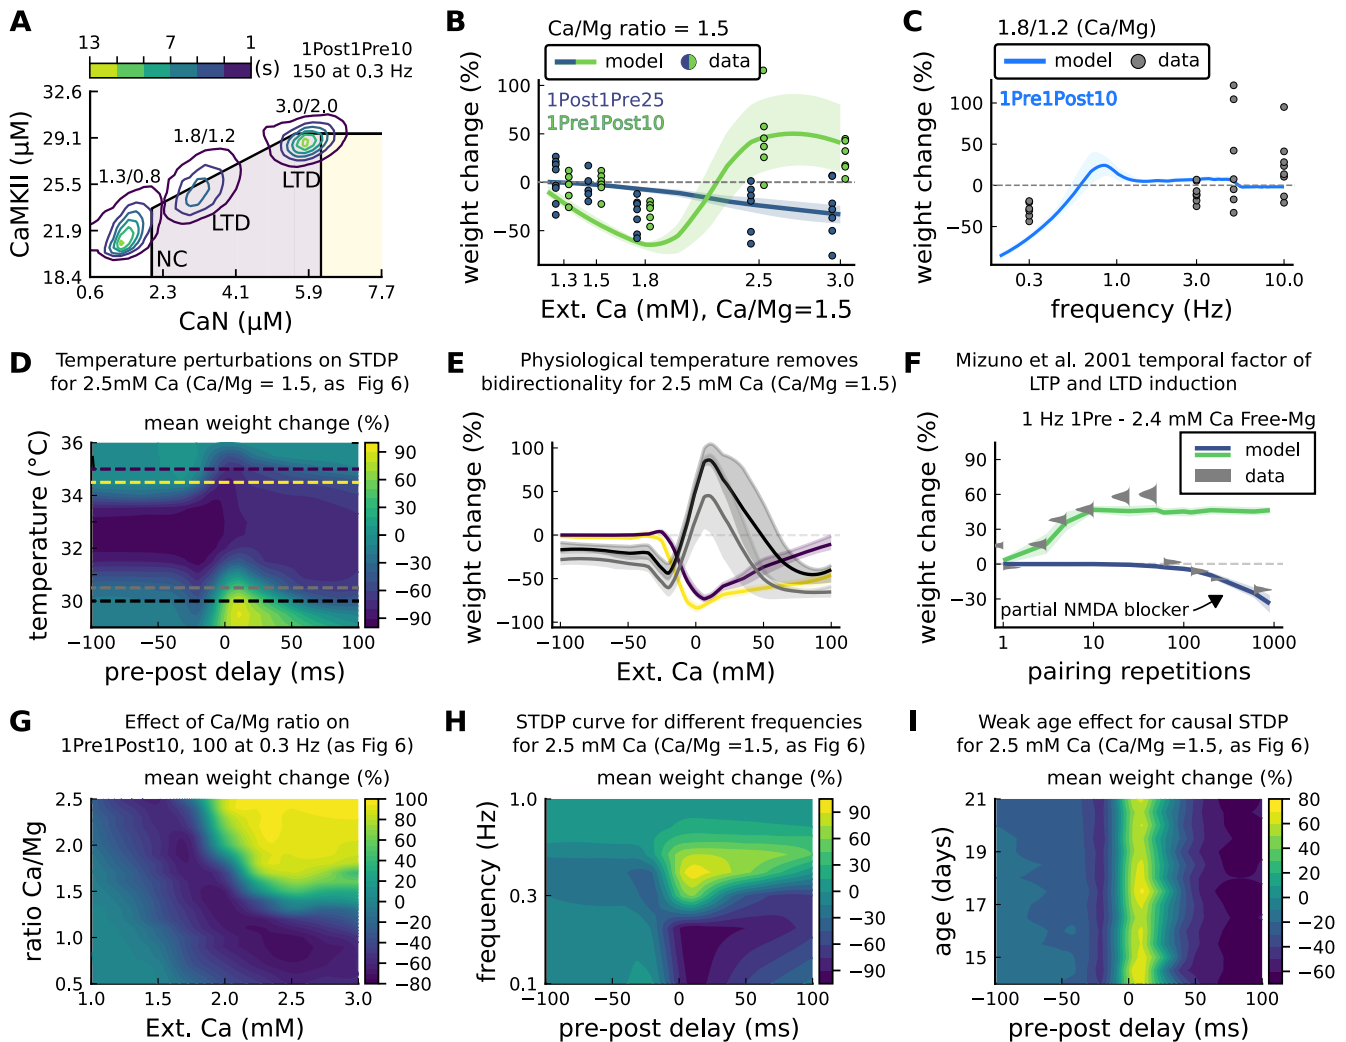

**Figure S4.**  $[\text{Ca}^{2+}]_o$  and  $[\text{Mg}^{2+}]_o$  related modifications for Inglebert et al. (2020)'s experiment. Related to Figure 6. **A**) Mean time spent for anticausal pairing, 1Post1Pre10, at different Ca/Mg concentrations. The contour plots are associated with the Figure 6A, B and C. **B**) STDP and extracellular Ca/Mg. Synaptic weight change (%) for causal (1Pre1Post10, 100 at 0.3 Hz) and anticausal (1Post1Pre10, 150 at 0.3 Hz) pairings varying  $[\text{Ca}^{2+}]_o$  from 1.0 to 3 mM (Ca/Mg ratio = 1.5). **C**) Varying frequency and extracellular Ca/Mg for the causal pairing 1Pre1Post10, 100 at 0.3 Hz. Synaptic weight change (%) for a single causal pairing protocol varying frequency from 0.1 to 10 Hz.  $[\text{Ca}^{2+}]_o$  was fixed at 1.8 mM (Ca/Mg ratio = 1.5). **D**) Mean synaptic weight change (%) for Inglebert et al. (2020)'s STDP experiment showing how temperature qualitatively modifies plasticity. The dashed lines are plotted in panel B. **E**) Mean synaptic weight change (%) showing effects 0.5°C from panel A. Black and grey solid lines represent the same color dashed lines in panel A (30 and 30.5°C). The bidirectional curves, black and grey lines in panel A (dashed) and panel B (solid), becoming full-LTD when temperature increases to 34.5 and 35°C, respectively yellow and purple lines in panel A (dashed) and panel B (solid). Further increase abolishes plasticity. **F**) Mean synaptic weight change (%) for Mizuno et al. (2001)'s experiment in Free-Mg ( $[\text{Mg}^{2+}]_o = 10^{-3}$  mM for best fit) showing the different time requirements to induce LTP and LTD. For LTD, to simulate the NMDAR antagonist D-AP5 which causes a NMDAR partial blocking we reduced the NMDAR conductance by 97%. Note the similarity with Figure S1F. **G**) Mean synaptic weight change (%) of Inglebert et al. (2020)'s STDP experiment changing  $[\text{Ca}^{2+}]_o$  and Ca/Mg ratio. **H**) Mean synaptic weight change (%) of Inglebert et al. (2020)'s STDP experiment changing pre-post delay time and frequency. Note the similarity with Figure S1C. **I**) Mean synaptic weight change (%) of Inglebert et al. (2020)'s STDP experiment changing pre-post delay time and age. Age has a weak effect on this experiment done at  $[\text{Ca}^{2+}]_o = 2.5$  mM.



Figure S5 shows multiple aspects related to temperature in STDP experiments and the temperature and age choices for the publications described in Table M1 compared to physiological conditions. We estimate how the rat's body temperature physiologically evolves in function of age using McCauley et al. (2020) and Wood et al. (2016)'s data.

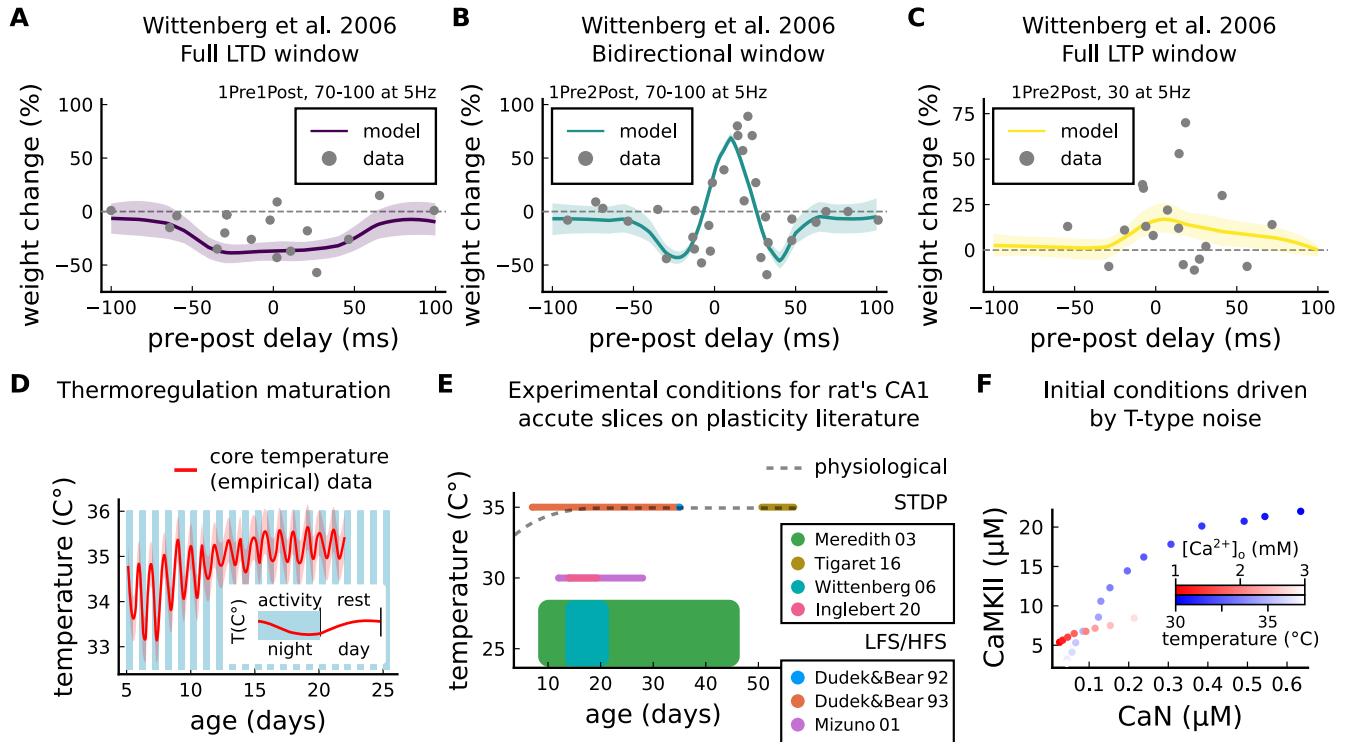

**Figure S5. Age and temperature effects. Related to Figure 3 and 6.** A) Mean synaptic weight change (%) for Wittenberg and Wang (2006)'s STDP experiment for 1Pre1Post10, 70-100 at 5 Hz (see Table M1) showing a full LTD window. Our model also reproduces the fact that increasing temperature to 32-34°C the LTD is abolished (data not shown). B) Mean synaptic weight change (%) for Wittenberg and Wang (2006)'s STDP experiment for 1Pre2Post10, 70-100 at 5 Hz (see Table M1) showing a bidirectional window. We report that for Wittenberg and Wang (2006) experiment done in room temperature the temperature sensitivity was higher than other experiments. C) Mean synaptic weight change (%) for Wittenberg and Wang (2006)'s STDP experiment for 1Pre2Post10, 20-30 at 5 Hz (see Table M1) showing a bidirectional window. D) Core temperature varying with age representing the thermoregulation maturation. This function (not shown) was fitted using rat Wood et al. (2016) and mouse data (McCauley et al., 2020) added by 1°C to compensate species differences (Wood et al., 2016). The blue and white bars represent the circadian rhythm as shown in (McCauley et al., 2020). However, the "rest rhythm" for young rats (P5-14) may vary. E) Plot showing how far from being physiological are plasticity experiments done in physiological temperatures. Suggesting, there is scarcity of physiologically relevant data to model and understand plasticity. The dashed grey line is an approximation of the mean value from panel G. F) Initial conditions for CaN-CaMKII resting concentration for different  $[Ca^{2+}]_o$  and temperature values. When  $[Ca^{2+}]_o$  is changed temperature is fixed at 35°C, while temperature is changed  $[Ca^{2+}]_o$  is fixed at 2 mM.
